# Supplementary material
Source: Elsevier journal article supplement (https://comptes-rendus.academie-sciences.fr/biologies/article/10.1016/j.crvi.2018.10.001/file/attach/mmc1.pdf)

subcluster\_100\_log2\_medianCentered\_fpkm.matrix, 35 tr subcluster\_101\_log2\_medianCentered\_fpkm.matrix, 8 tr

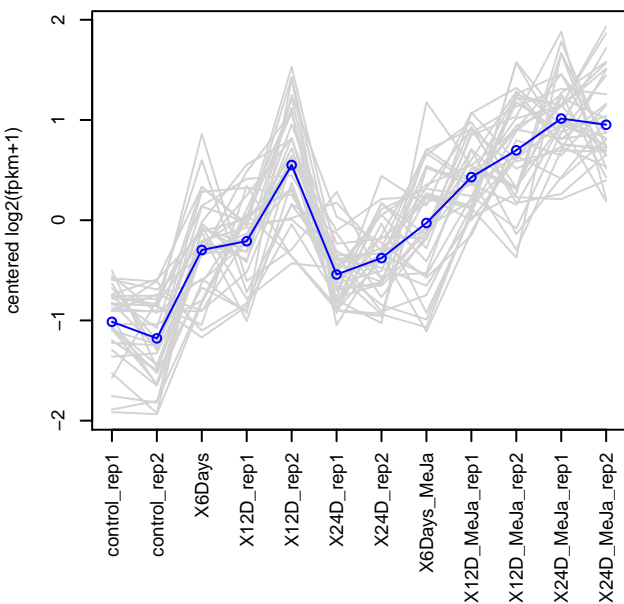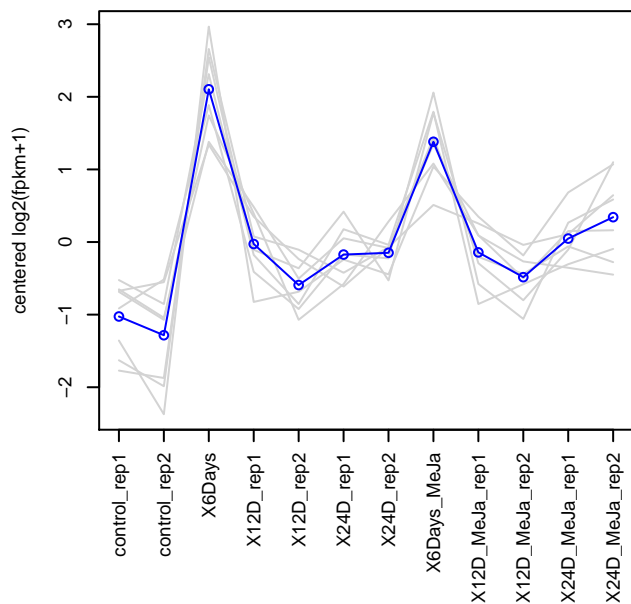

subcluster\_102\_log2\_medianCentered\_fpkm.matrix, 38 tr subcluster\_103\_log2\_medianCentered\_fpkm.matrix, 8 tr

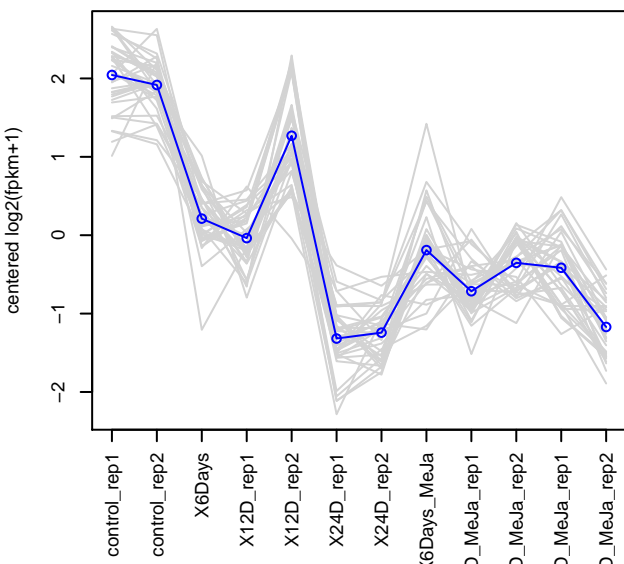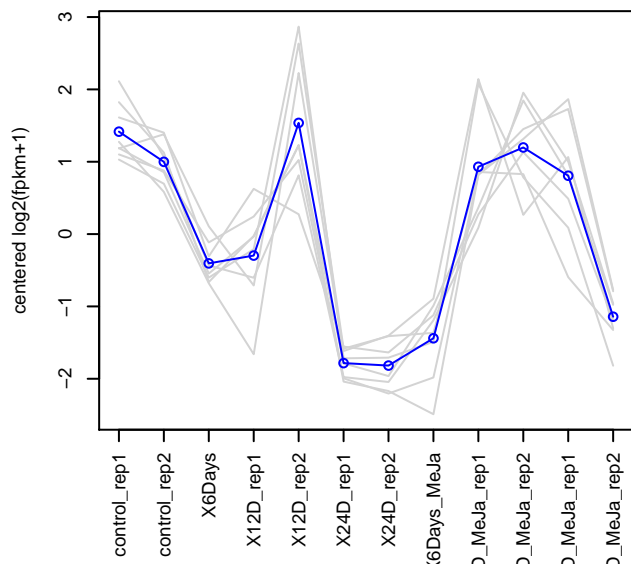

subcluster\_104\_log2\_medianCentered\_fpkm.matrix, 6 tra

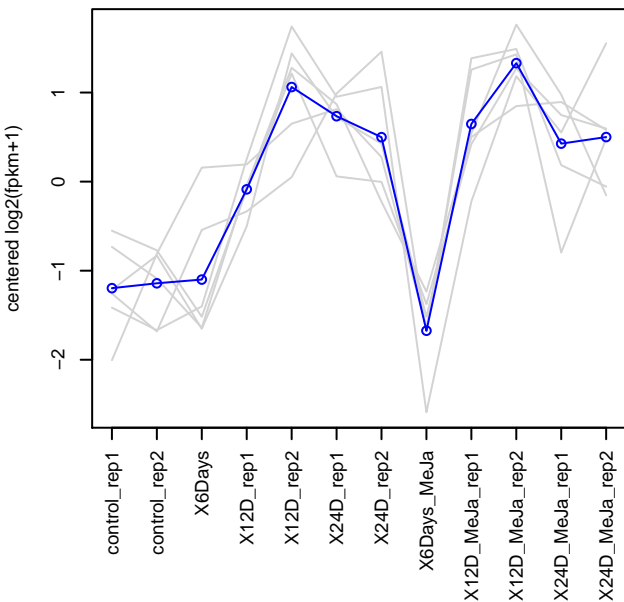

subcluster\_105\_log2\_medianCentered\_fpkm.matrix, 2 tra

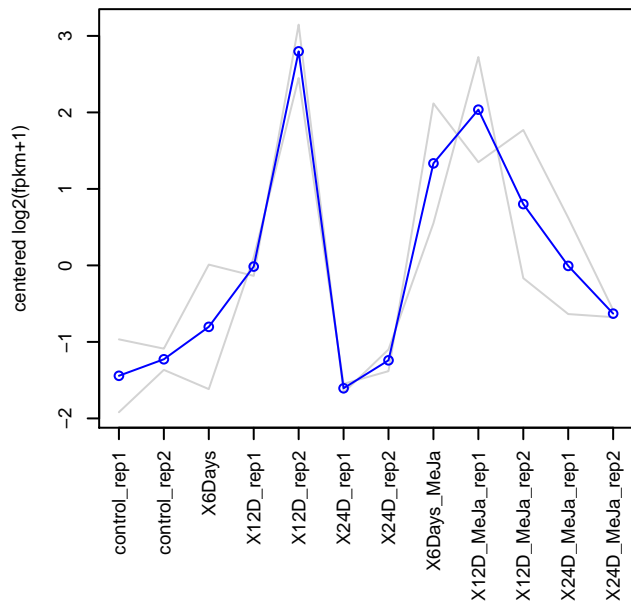

subcluster\_106\_log2\_medianCentered\_fpkm.matrix, 23 tra

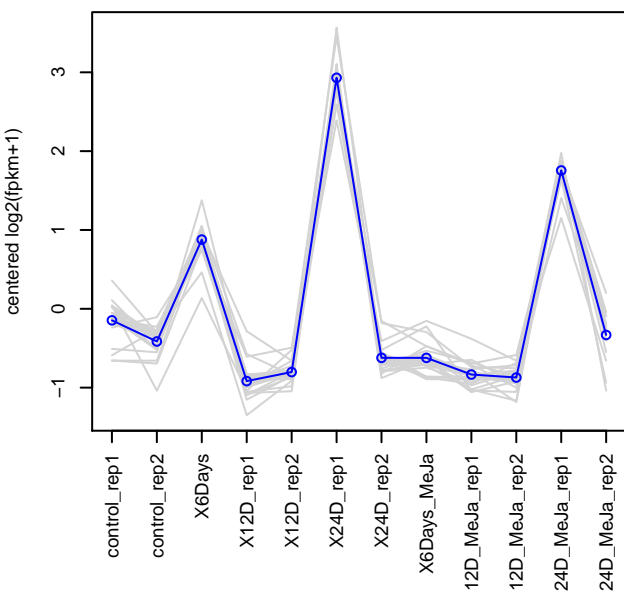

subcluster\_107\_log2\_medianCentered\_fpkm.matrix, 4 tra

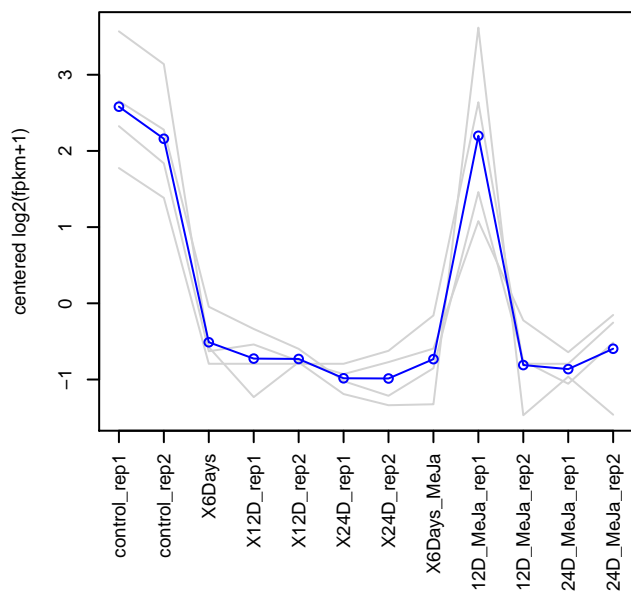

subcluster\_108\_log2\_medianCentered\_fpk.m.matrix, 13 tr: subcluster\_109\_log2\_medianCentered\_fpk.m.matrix, 74 tr

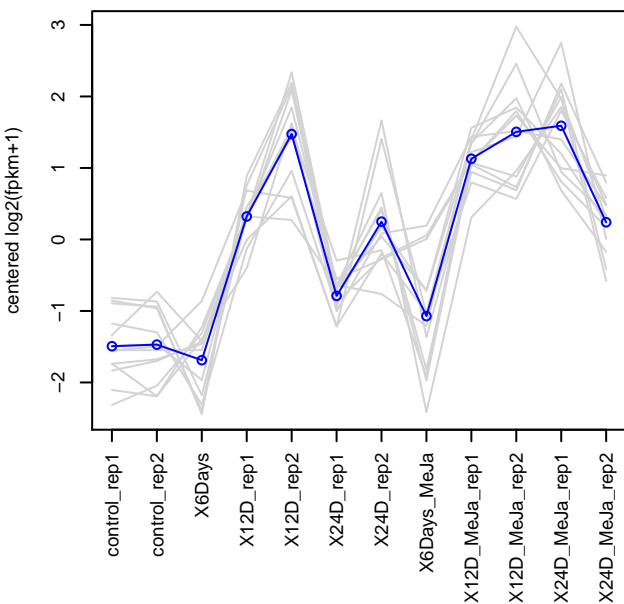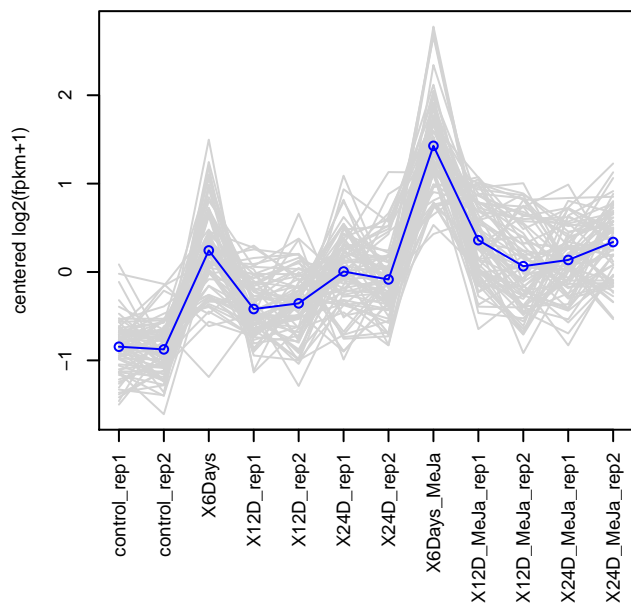

subcluster\_10\_log2\_medianCentered\_fpk.m.matrix, 124 tr: subcluster\_110\_log2\_medianCentered\_fpk.m.matrix, 15 tr

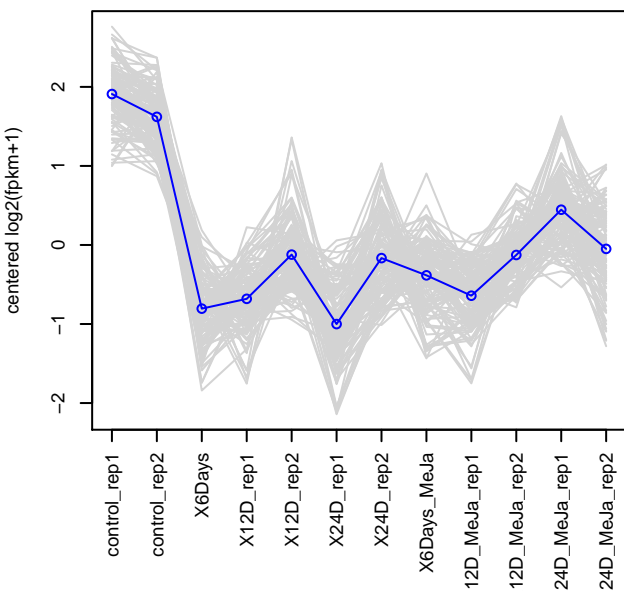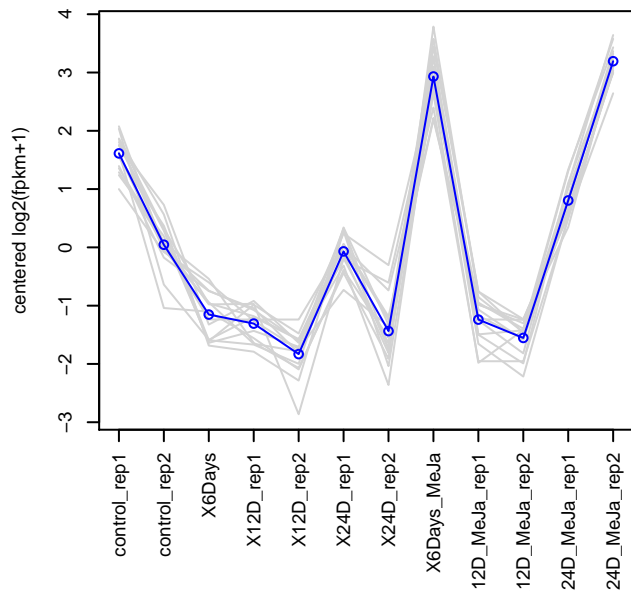

subcluster\_111\_log2\_medianCentered\_fpk.m.matrix, 18 tr: subcluster\_112\_log2\_medianCentered\_fpk.m.matrix, 20 tr

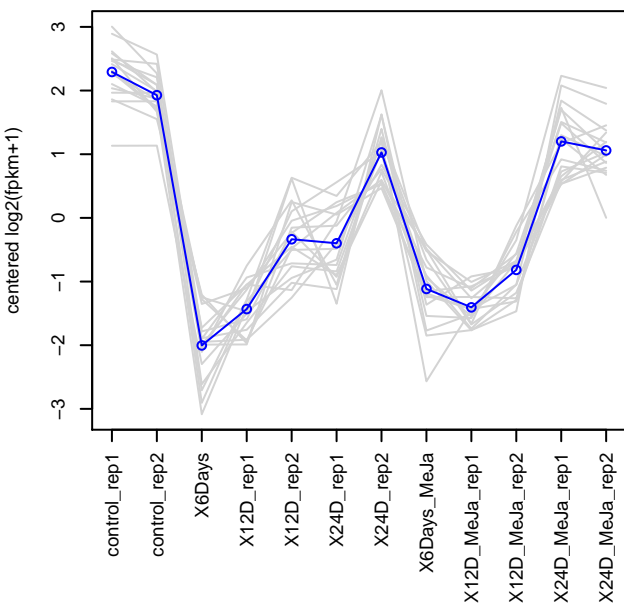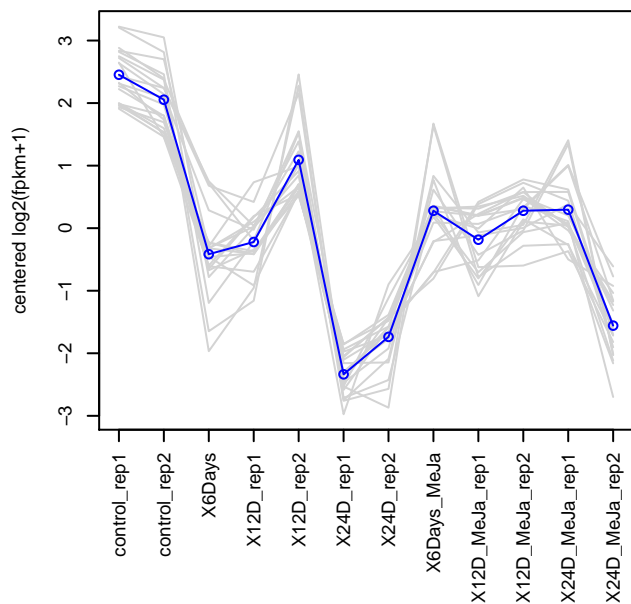

subcluster\_113\_log2\_medianCentered\_fpk.m.matrix, 16 tr: subcluster\_114\_log2\_medianCentered\_fpk.m.matrix, 22 tr

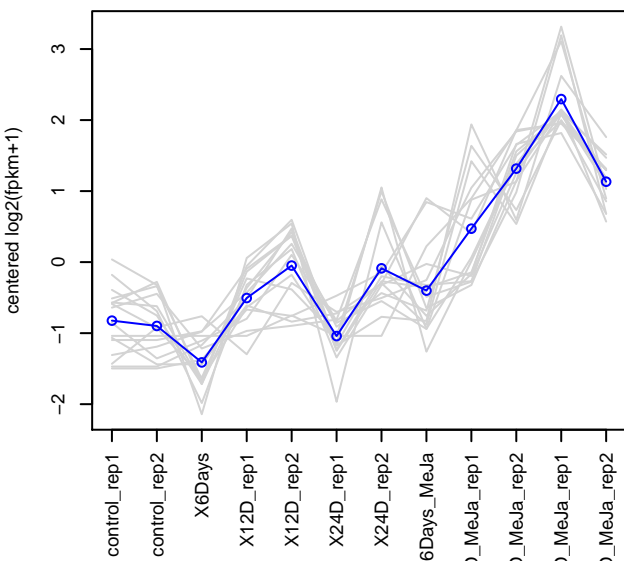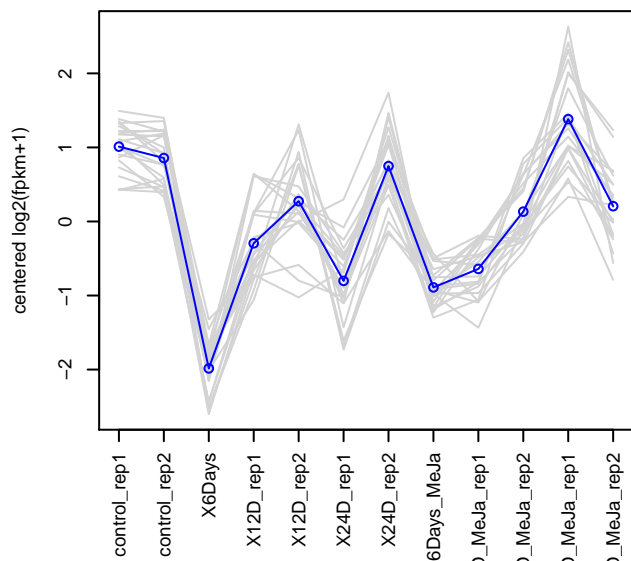

subcluster\_115\_log2\_medianCentered\_fpkm.matrix, 5 tra

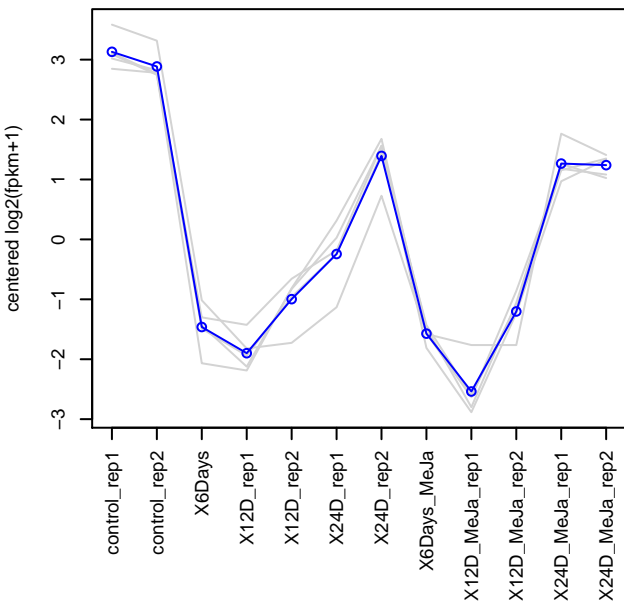

subcluster\_116\_log2\_medianCentered\_fpkm.matrix, 41 tra

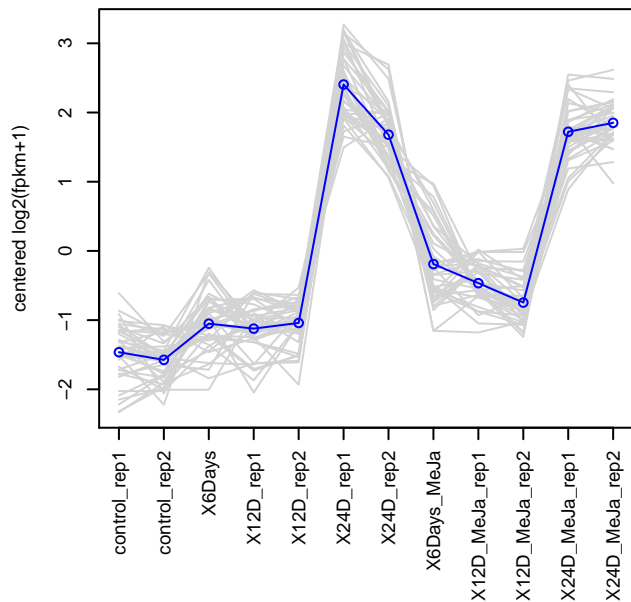

subcluster\_117\_log2\_medianCentered\_fpkm.matrix, 12 tra

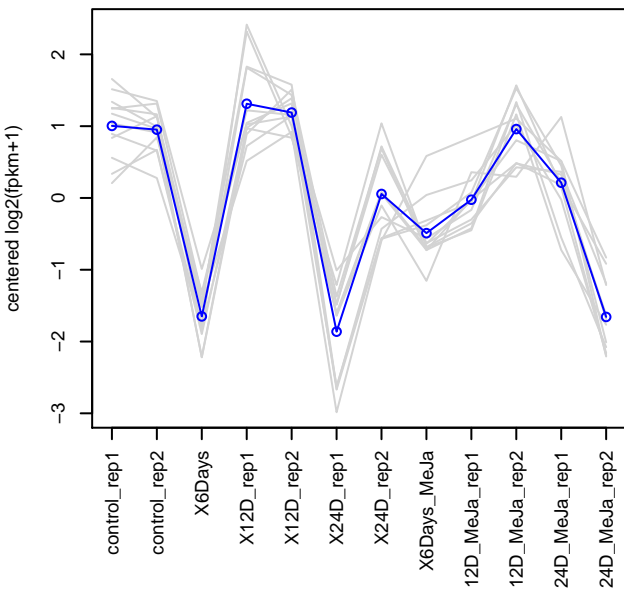

subcluster\_118\_log2\_medianCentered\_fpkm.matrix, 5 tra

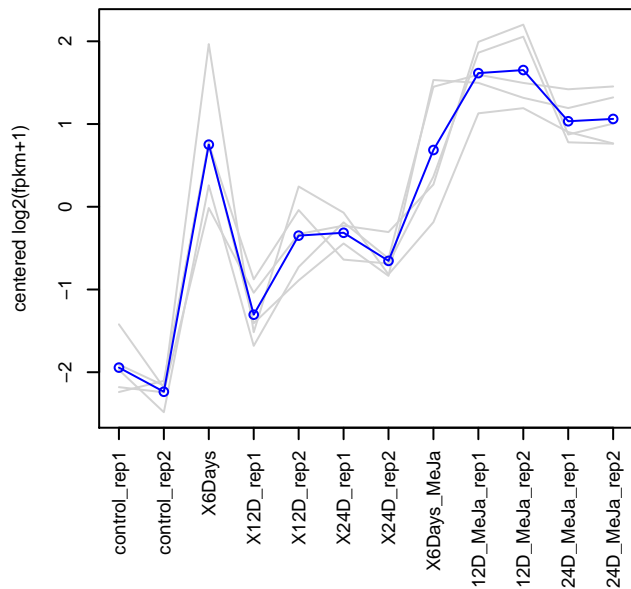

subcluster\_119\_log2\_medianCentered\_fpk.m.matrix, 20 tra

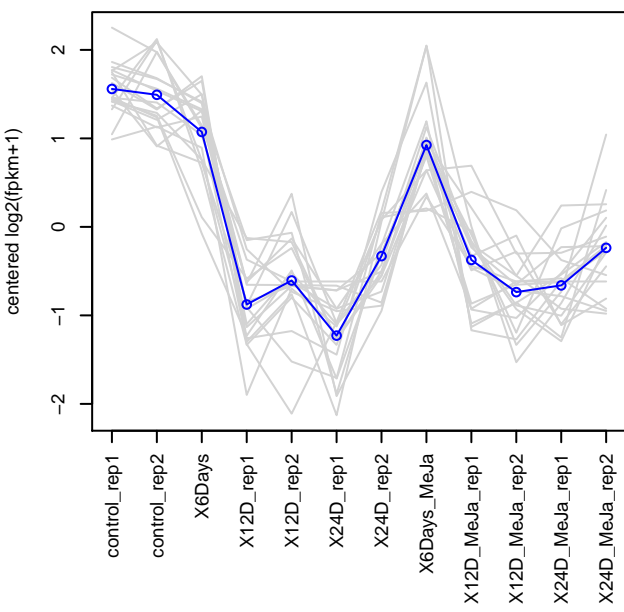

subcluster\_11\_log2\_medianCentered\_fpk.m.matrix, 5 tra

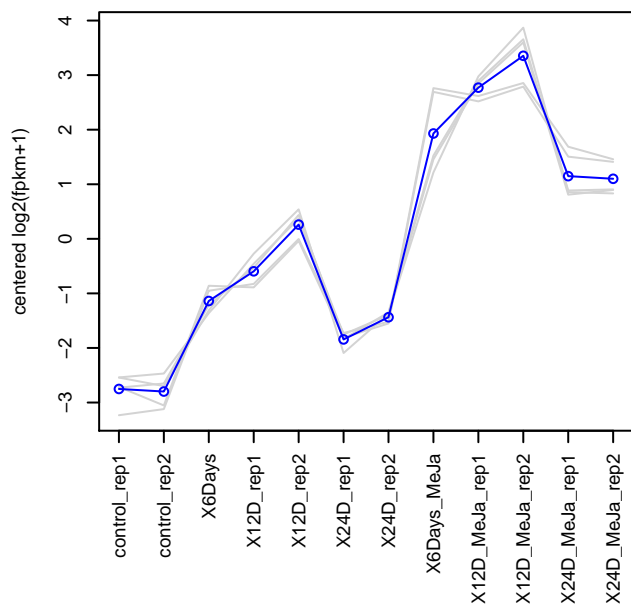

subcluster\_120\_log2\_medianCentered\_fpk.m.matrix, 17 tra

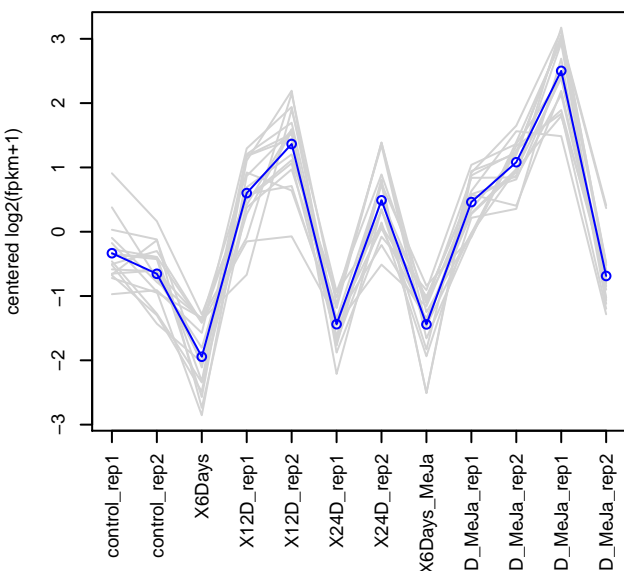

subcluster\_121\_log2\_medianCentered\_fpk.m.matrix, 5 tra

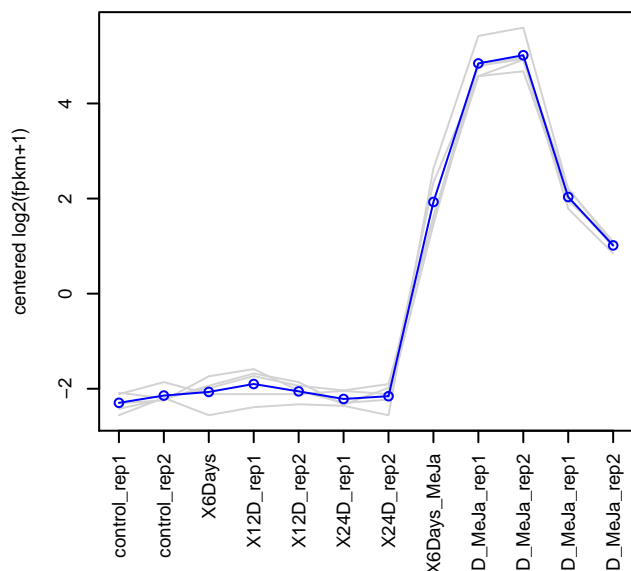

subcluster\_122\_log2\_medianCentered\_fpkm.matrix, 22 transcripts

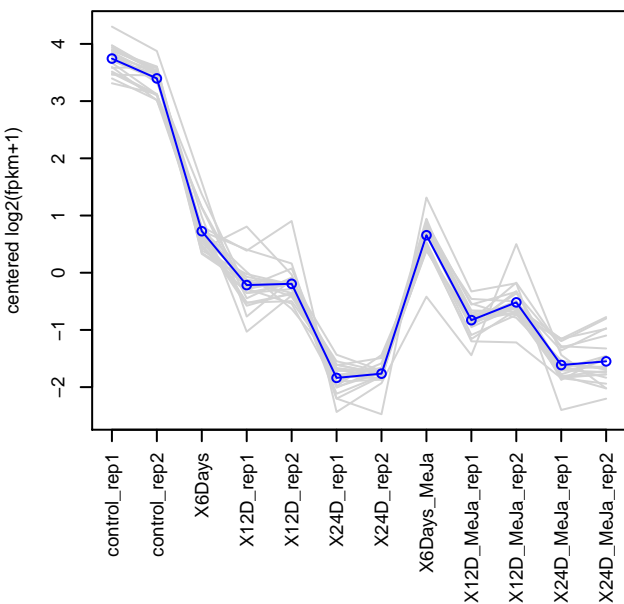

subcluster\_123\_log2\_medianCentered\_fpkm.matrix, 6 transcripts

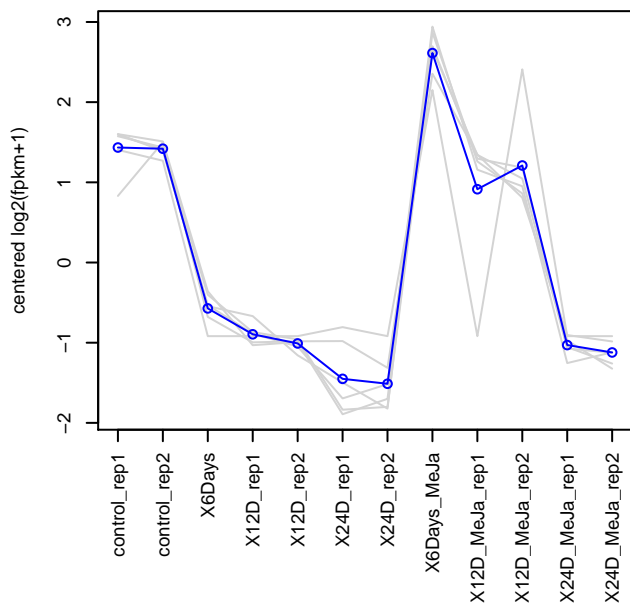

subcluster\_124\_log2\_medianCentered\_fpkm.matrix, 27 transcripts

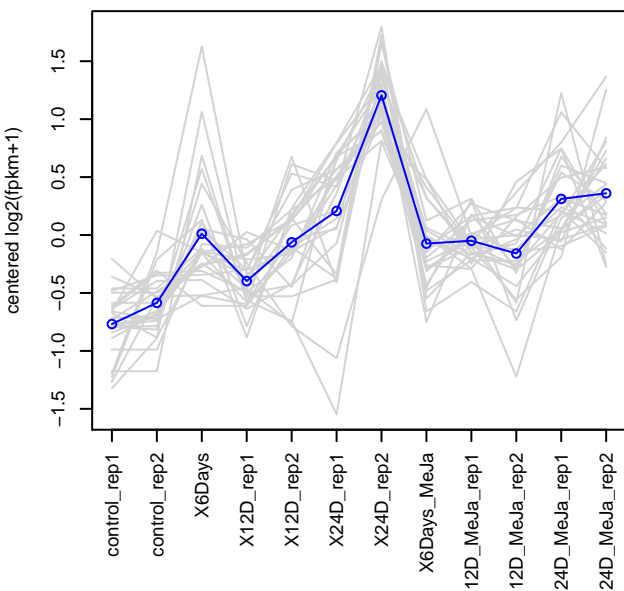

subcluster\_125\_log2\_medianCentered\_fpkm.matrix, 7 transcripts

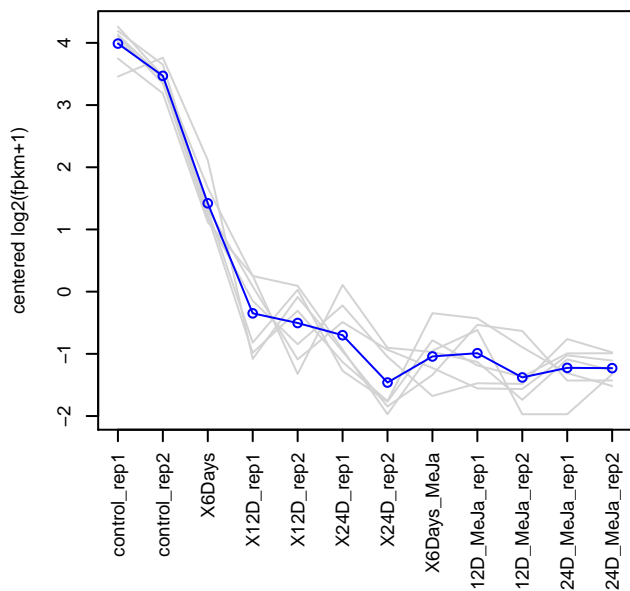

subcluster\_126\_log2\_medianCentered\_fpkm.matrix, 5 tra

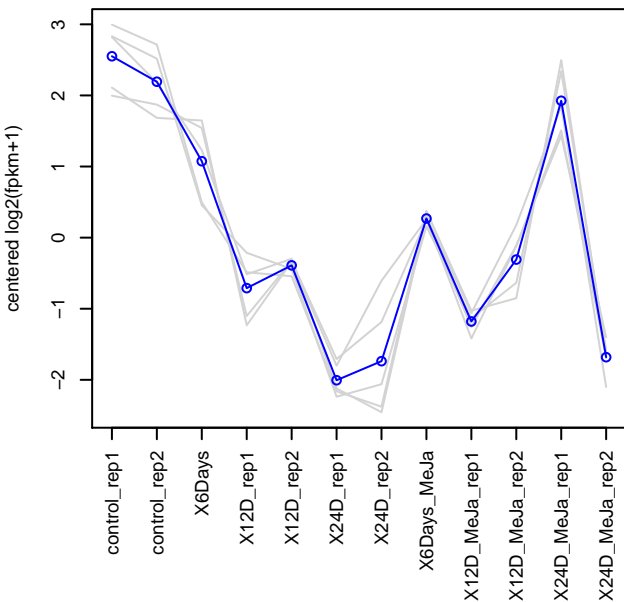

subcluster\_127\_log2\_medianCentered\_fpkm.matrix, 1 tra

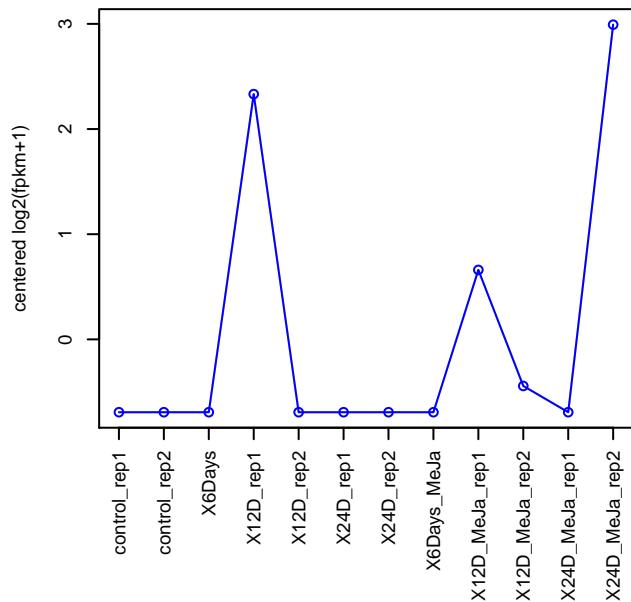

subcluster\_128\_log2\_medianCentered\_fpkm.matrix, 7 tra

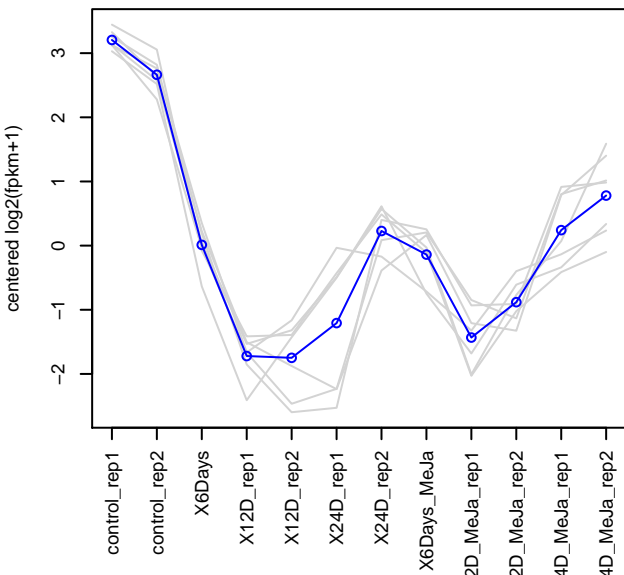

subcluster\_129\_log2\_medianCentered\_fpkm.matrix, 24 tra

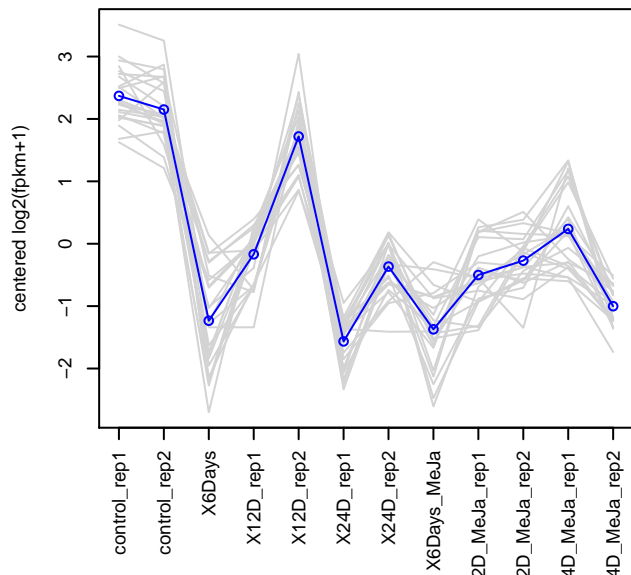



subcluster\_12\_log2\_medianCentered\_fpk.m.matrix, 3 trar

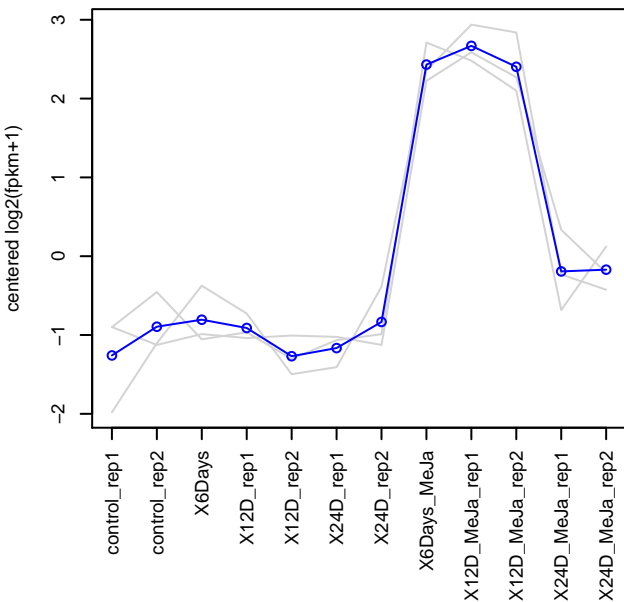

subcluster\_130\_log2\_medianCentered\_fpk.m.matrix, 63 tra

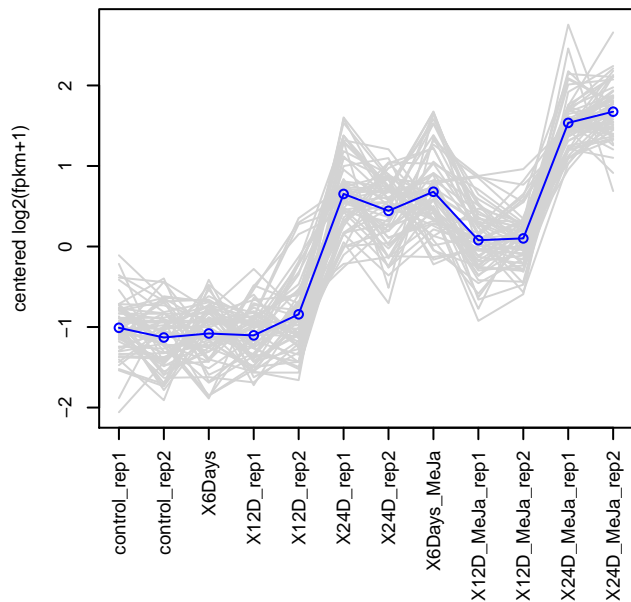

subcluster\_131\_log2\_medianCentered\_fpk.m.matrix, 29 tra

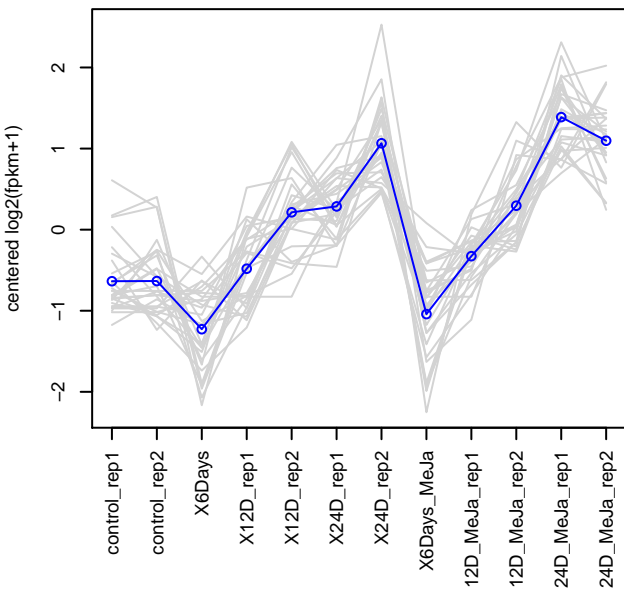

subcluster\_132\_log2\_medianCentered\_fpk.m.matrix, 41 tra

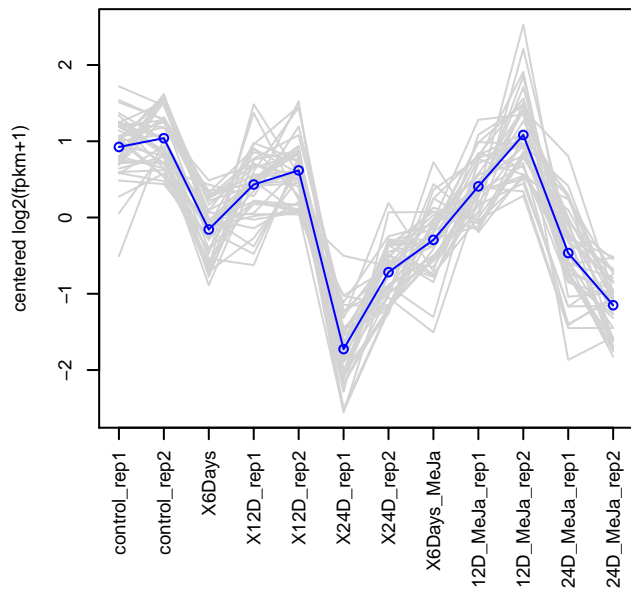

subcluster\_133\_log2\_medianCentered\_fpkm.matrix, 40 tr: subcluster\_134\_log2\_medianCentered\_fpkm.matrix, 11 tr

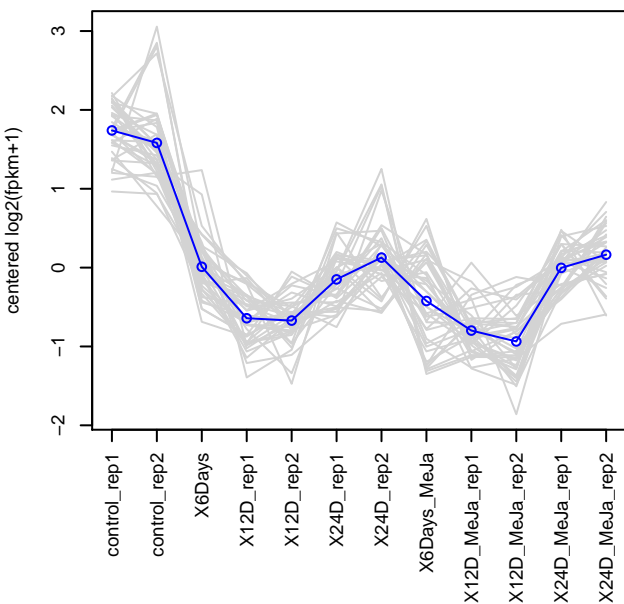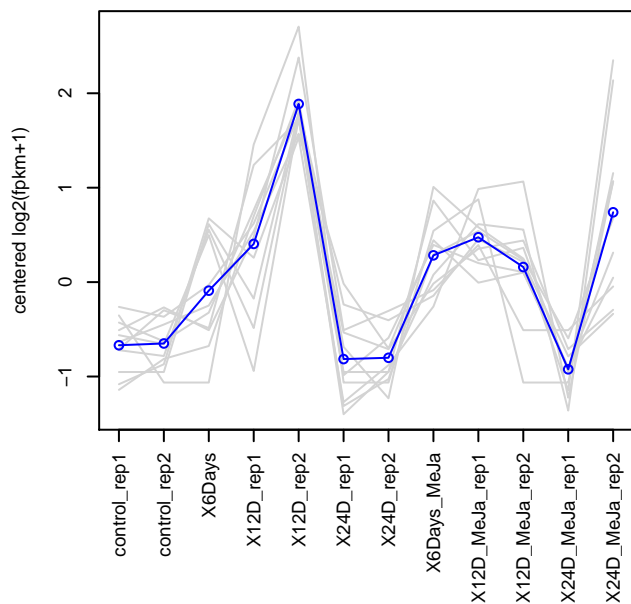

subcluster\_135\_log2\_medianCentered\_fpkm.matrix, 16 tr: subcluster\_136\_log2\_medianCentered\_fpkm.matrix, 2 tr

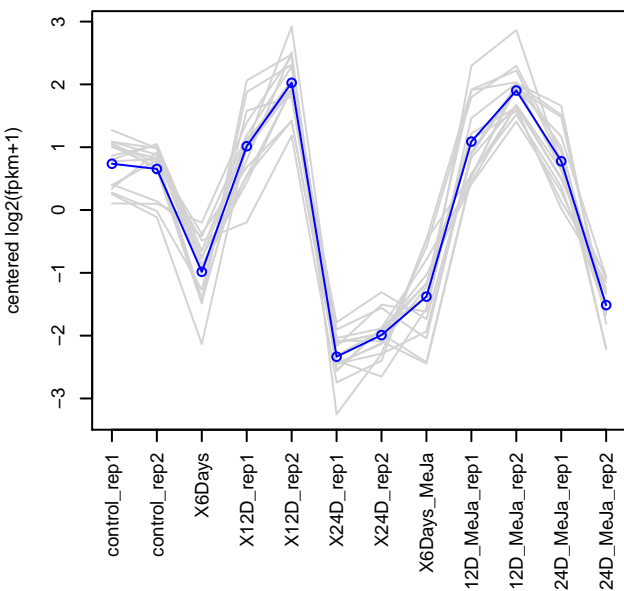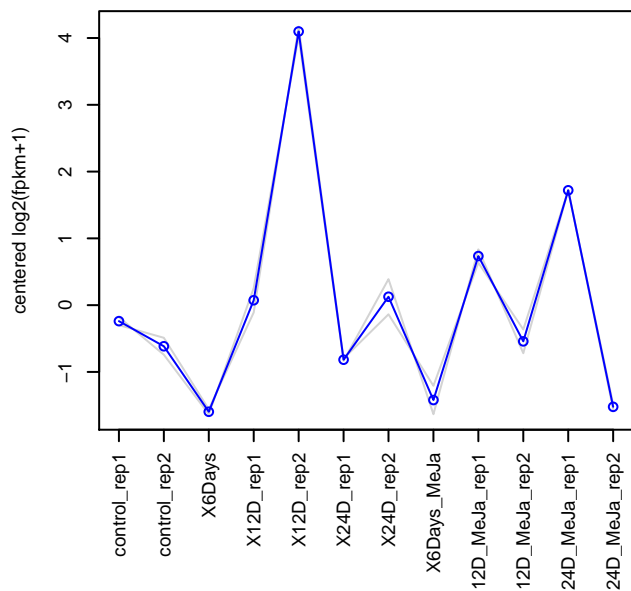

subcluster\_137\_log2\_medianCentered\_fpk.m.matrix, 37 tr; subcluster\_138\_log2\_medianCentered\_fpk.m.matrix, 16 tr

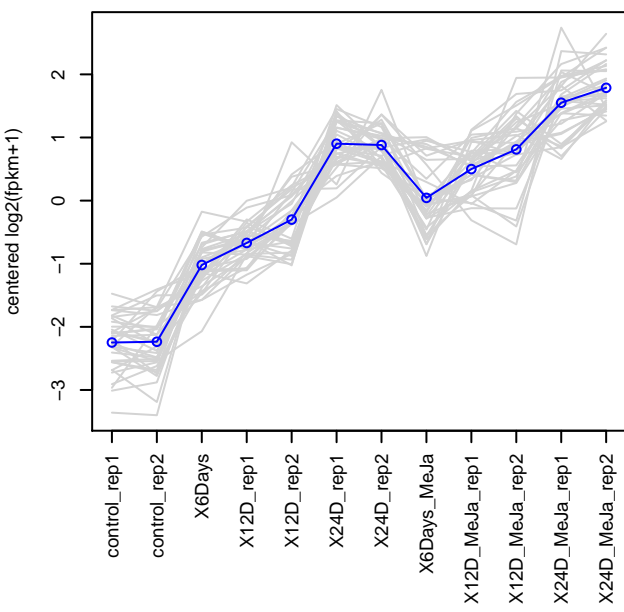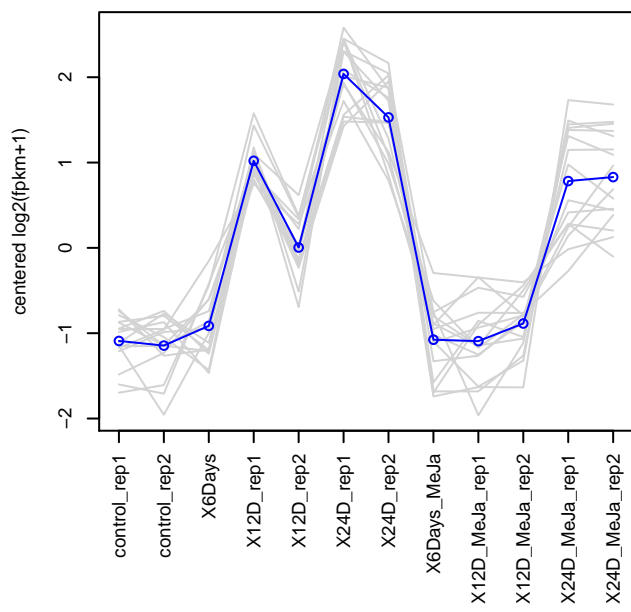

subcluster\_139\_log2\_medianCentered\_fpk.m.matrix, 13 tr; subcluster\_13\_log2\_medianCentered\_fpk.m.matrix, 14 tr

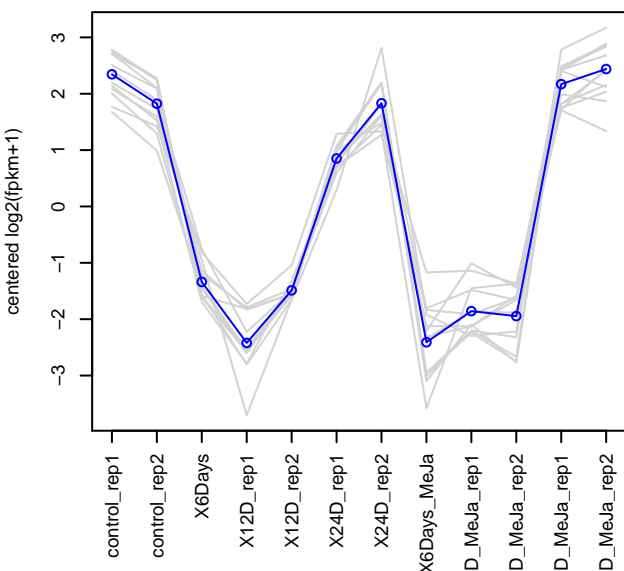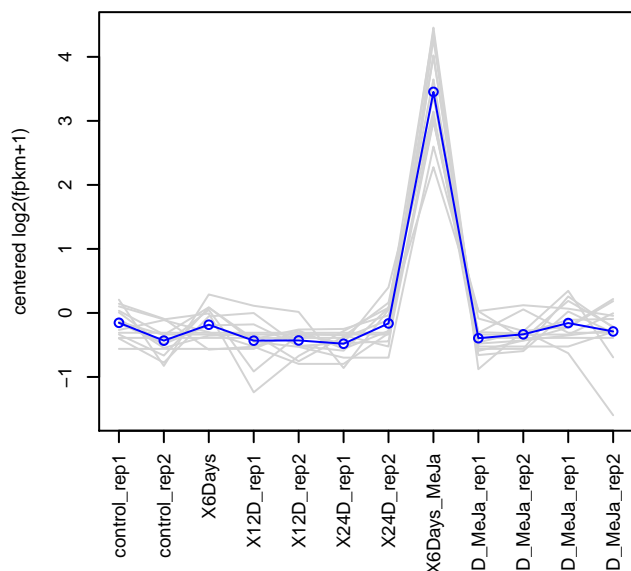

subcluster\_140\_log2\_medianCentered\_fpk.m.matrix, 25 tra

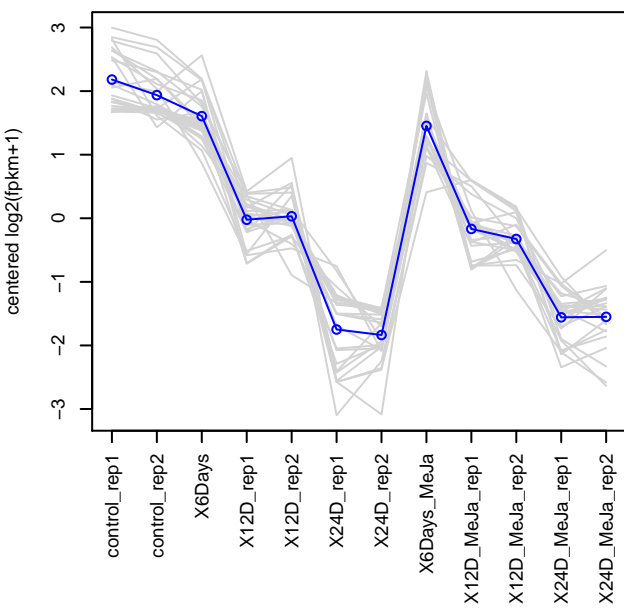

subcluster\_141\_log2\_medianCentered\_fpk.m.matrix, 19 tra

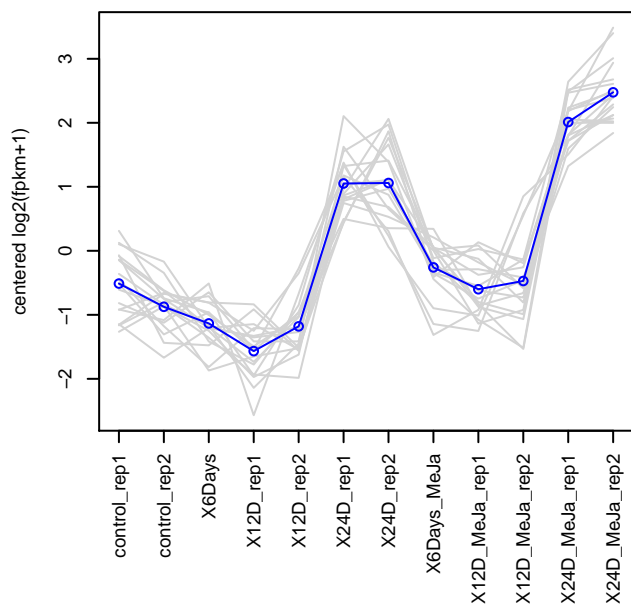

subcluster\_142\_log2\_medianCentered\_fpk.m.matrix, 5 tra

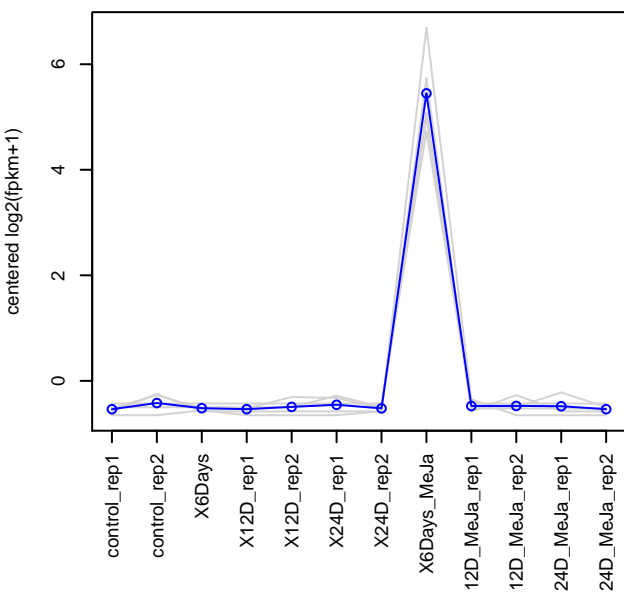

subcluster\_143\_log2\_medianCentered\_fpk.m.matrix, 10 tra

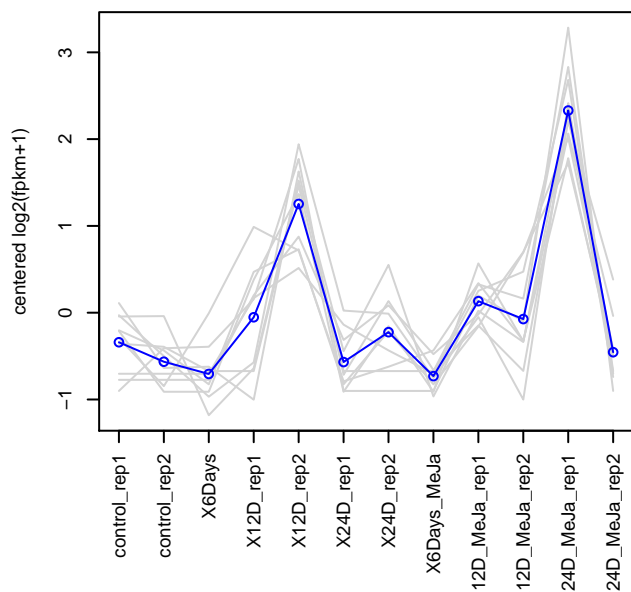

subcluster\_144\_log2\_medianCentered\_fpk.m.matrix, 24 tr; subcluster\_145\_log2\_medianCentered\_fpk.m.matrix, 26 tr

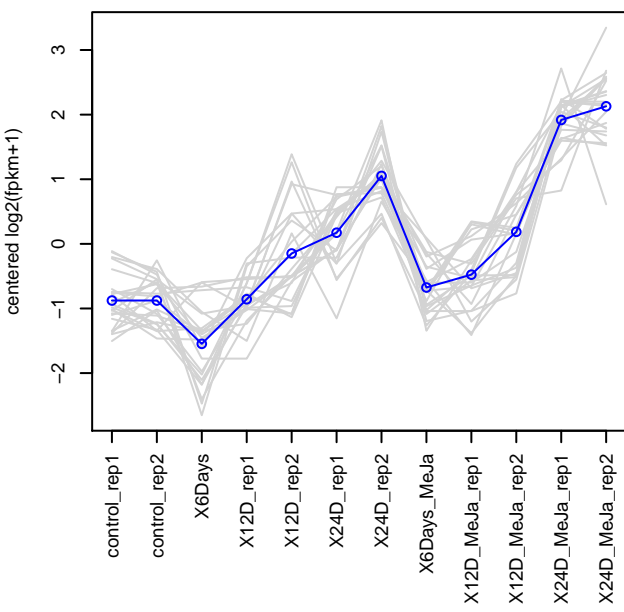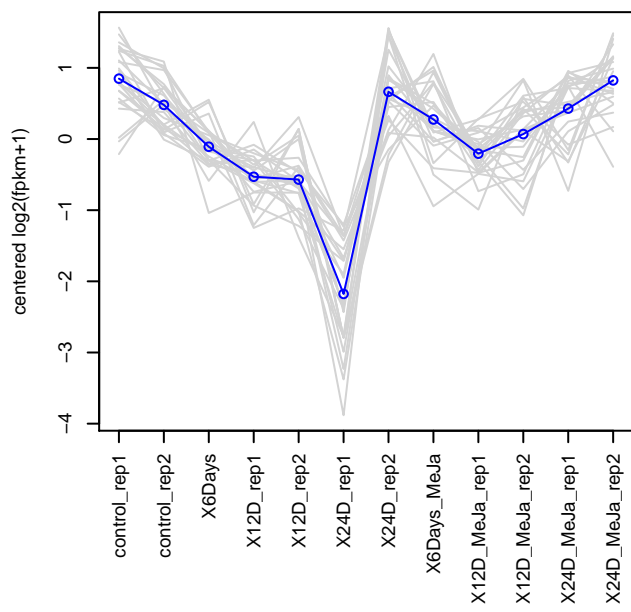

subcluster\_146\_log2\_medianCentered\_fpk.m.matrix, 27 tr; subcluster\_147\_log2\_medianCentered\_fpk.m.matrix, 2 tr

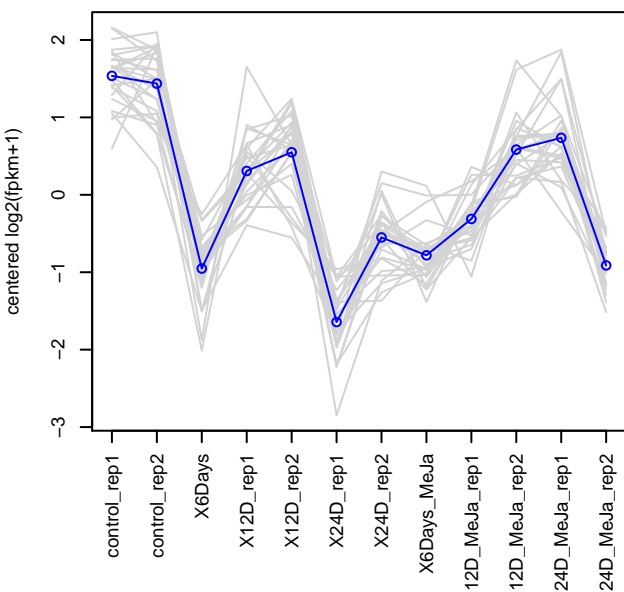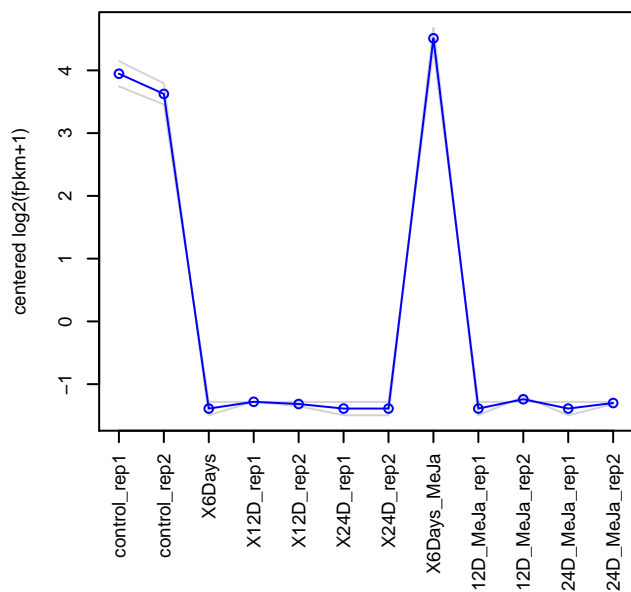

subcluster\_148\_log2\_medianCentered\_fpk.m.matrix, 25 tr: subcluster\_149\_log2\_medianCentered\_fpk.m.matrix, 12 tr

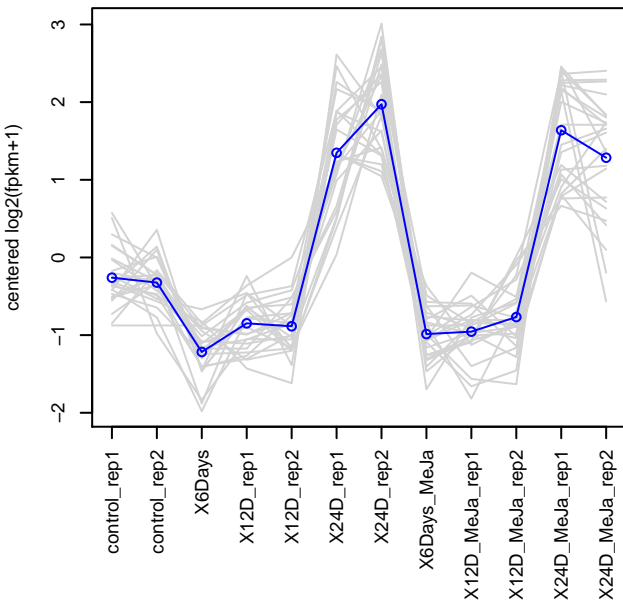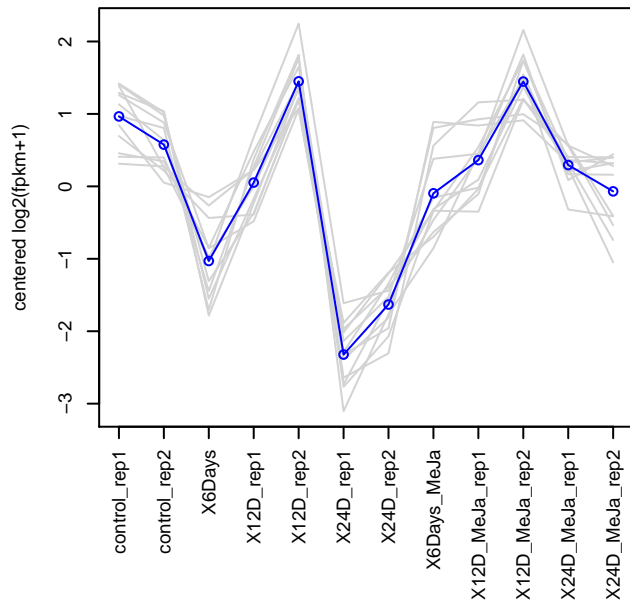

subcluster\_14\_log2\_medianCentered\_fpk.m.matrix, 267 tr: subcluster\_150\_log2\_medianCentered\_fpk.m.matrix, 27 tr

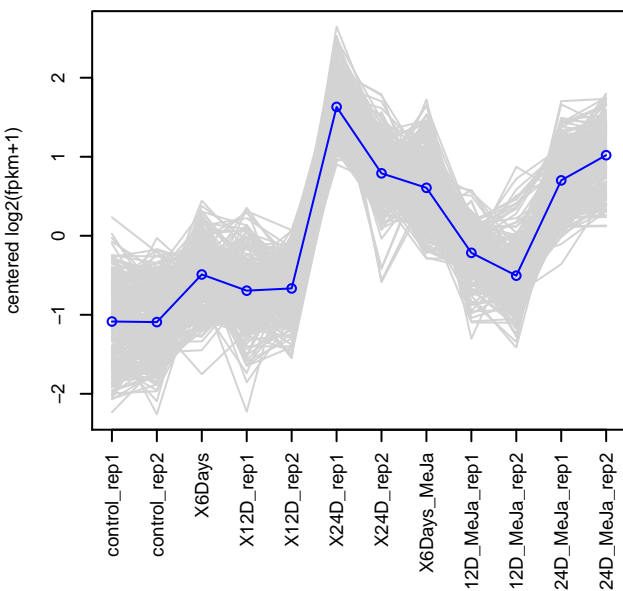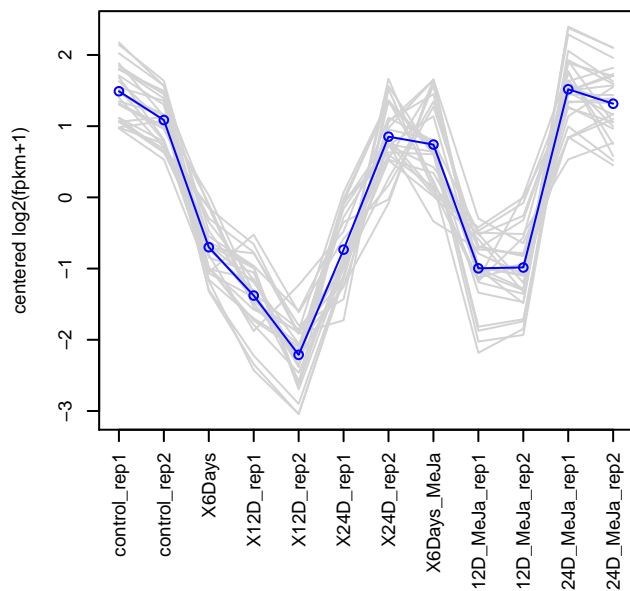

subcluster\_151\_log2\_medianCentered\_fpk.m.matrix, 34 tra subcluster\_152\_log2\_medianCentered\_fpk.m.matrix, 18 tra

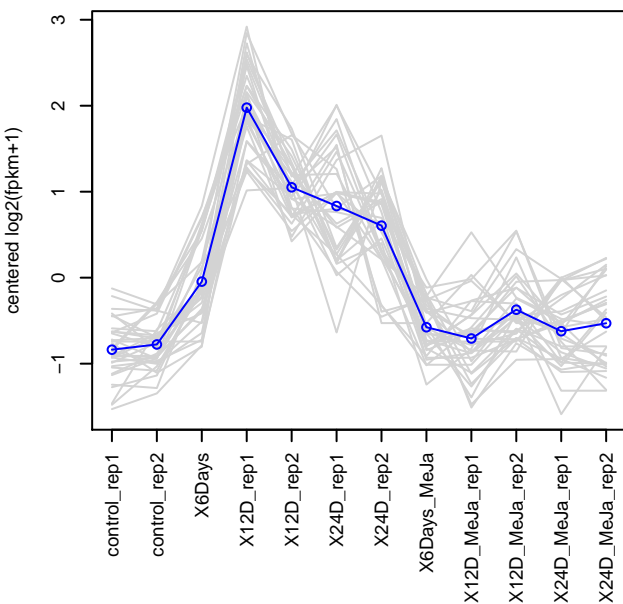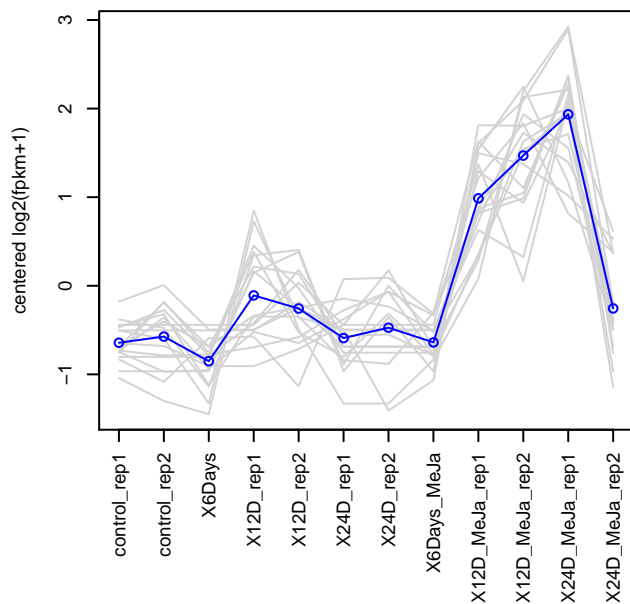

subcluster\_153\_log2\_medianCentered\_fpk.m.matrix, 7 tra subcluster\_154\_log2\_medianCentered\_fpk.m.matrix, 13 tra

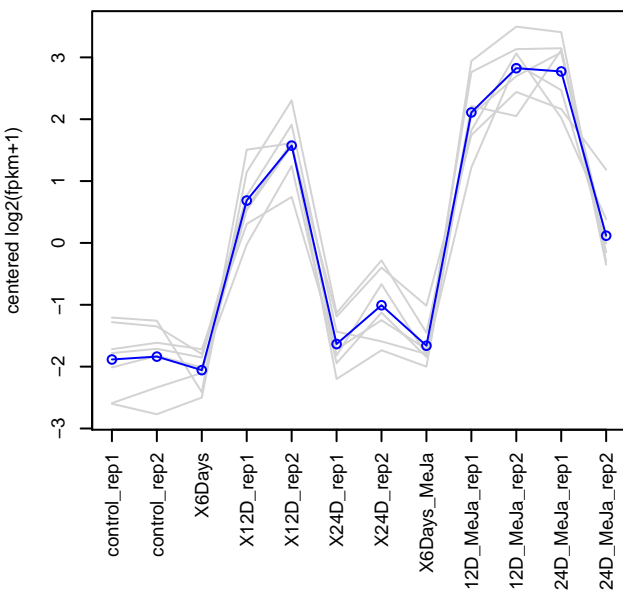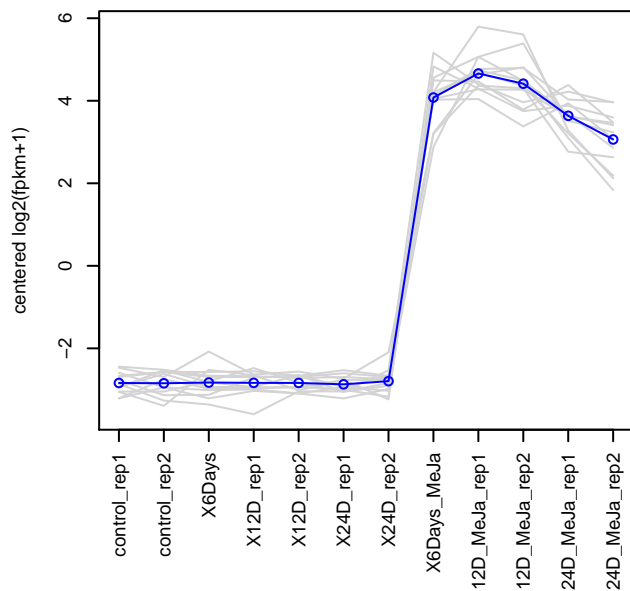

subcluster\_155\_log2\_medianCentered\_fpkm.matrix, 7 tra subcluster\_156\_log2\_medianCentered\_fpkm.matrix, 9 tra

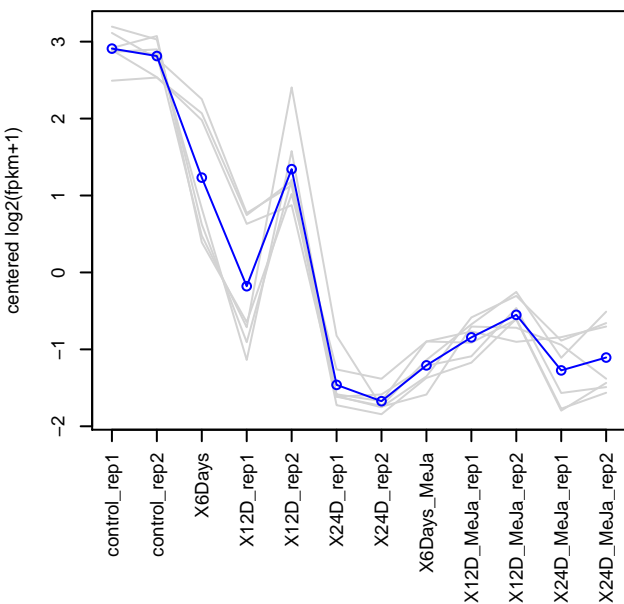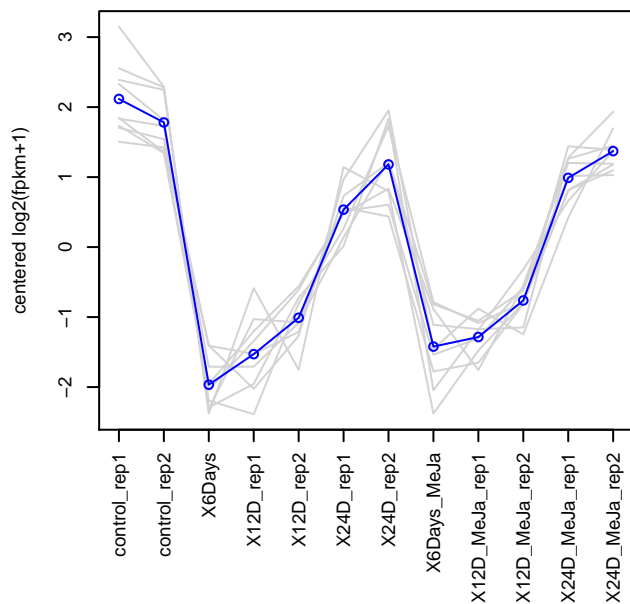

subcluster\_157\_log2\_medianCentered\_fpkm.matrix, 22 tra subcluster\_158\_log2\_medianCentered\_fpkm.matrix, 3 tra

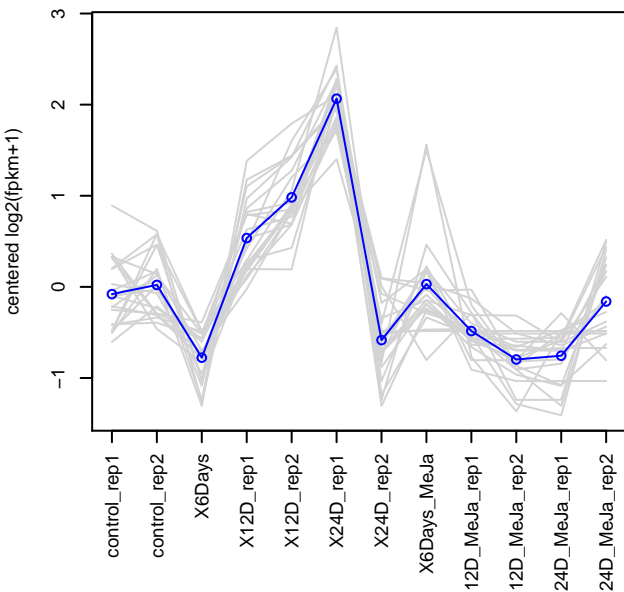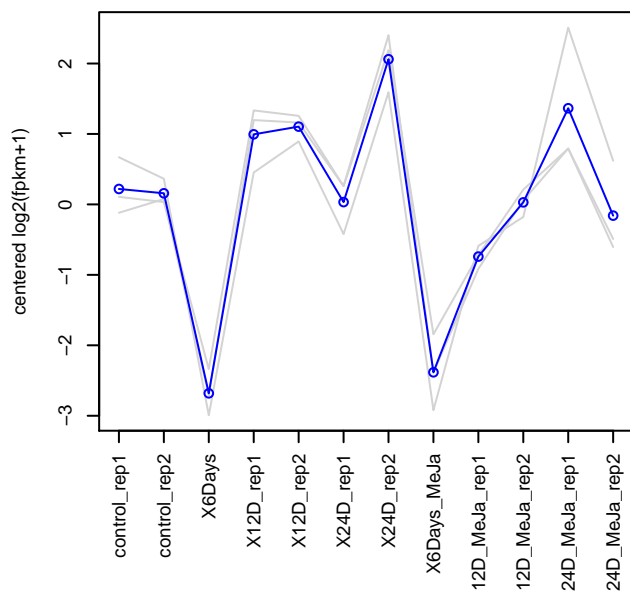



subcluster\_159\_log2\_medianCentered\_fpk.m.matrix, 2 tra

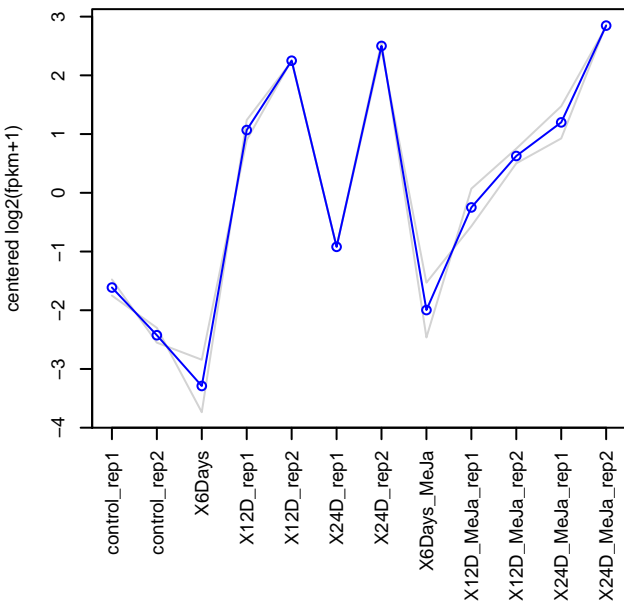

subcluster\_15\_log2\_medianCentered\_fpk.m.matrix, 4 tra

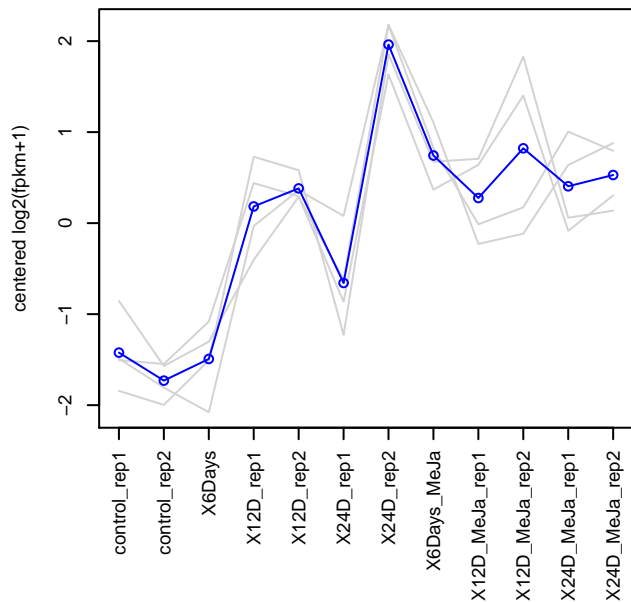

subcluster\_160\_log2\_medianCentered\_fpk.m.matrix, 21 tra

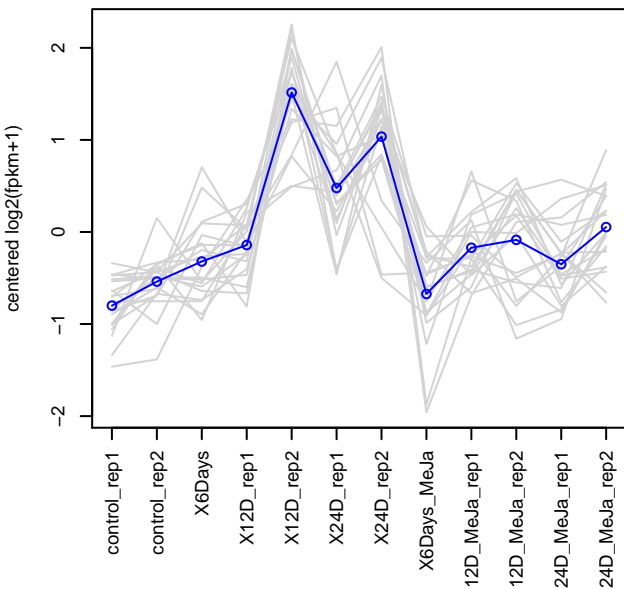

subcluster\_161\_log2\_medianCentered\_fpk.m.matrix, 16 tra

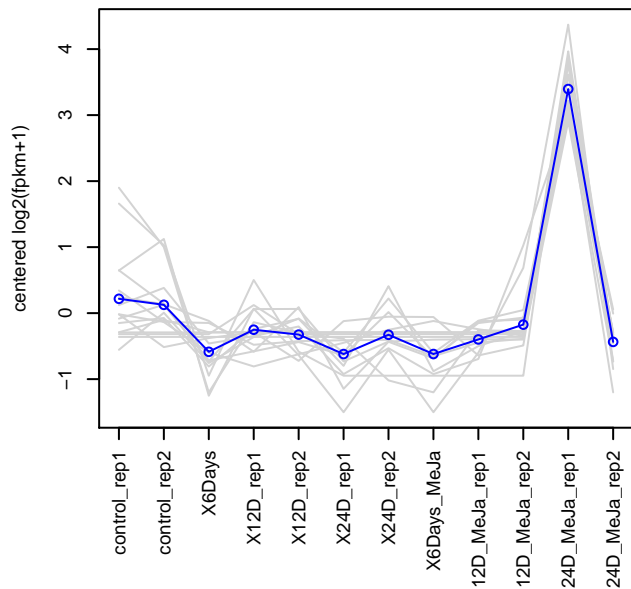

subcluster\_162\_log2\_medianCentered\_fpkm.matrix, 7 tra subcluster\_163\_log2\_medianCentered\_fpkm.matrix, 9 tra

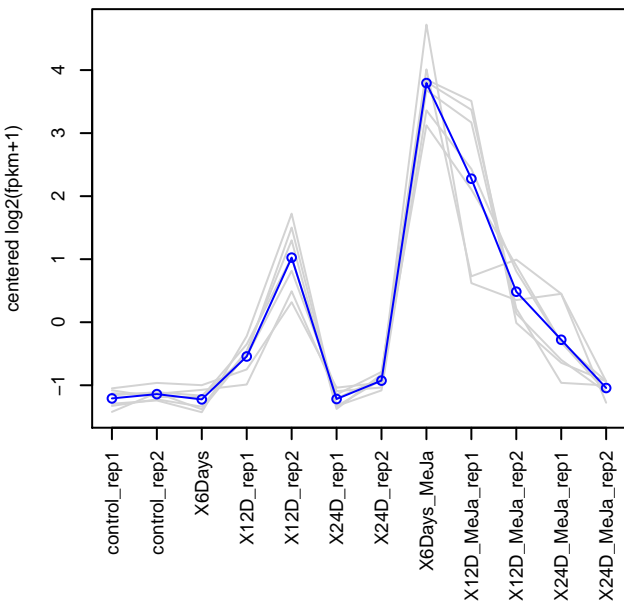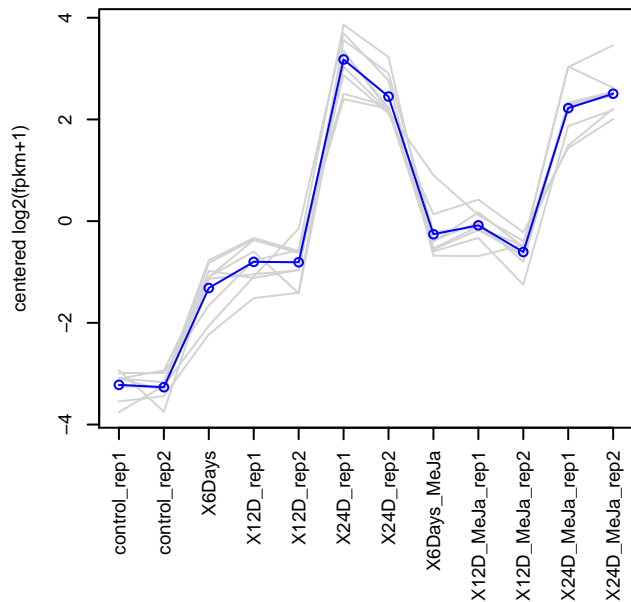

subcluster\_164\_log2\_medianCentered\_fpkm.matrix, 7 tra subcluster\_165\_log2\_medianCentered\_fpkm.matrix, 61 tra

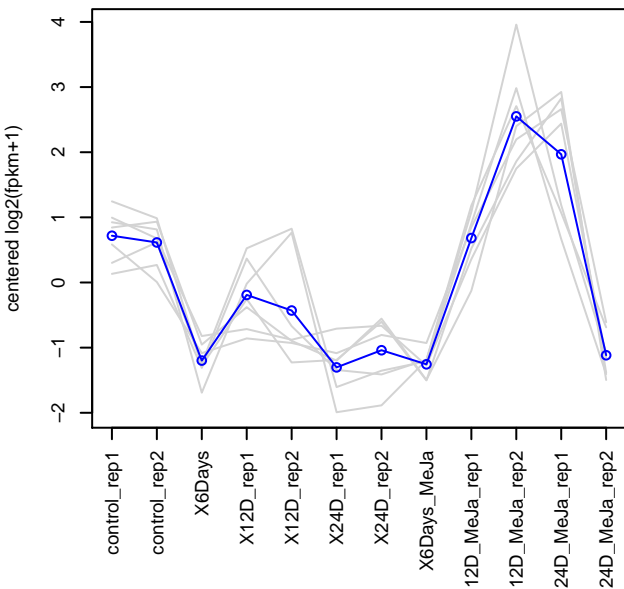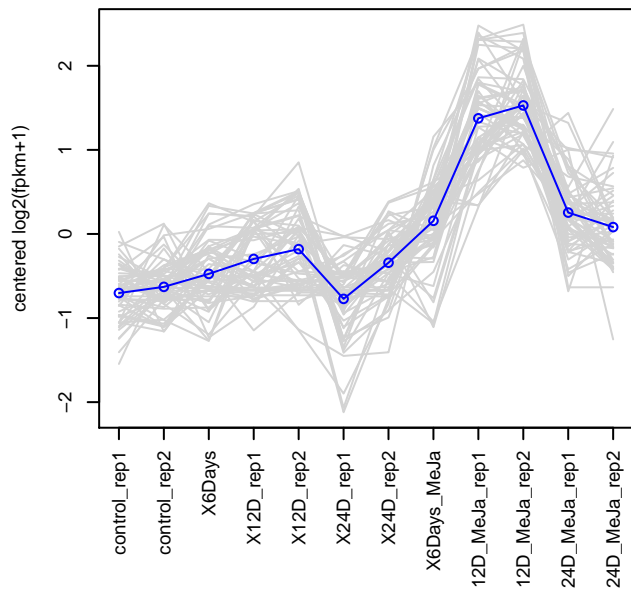

subcluster\_166\_log2\_medianCentered\_fpkm.matrix, 7 tra subcluster\_167\_log2\_medianCentered\_fpkm.matrix, 3 tra

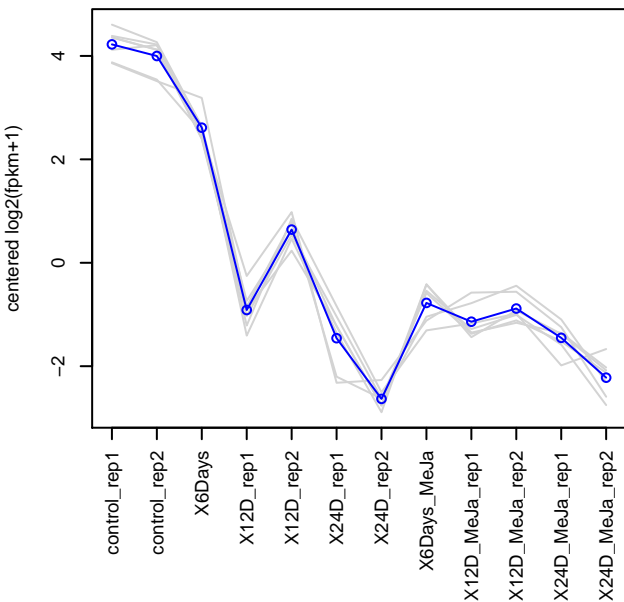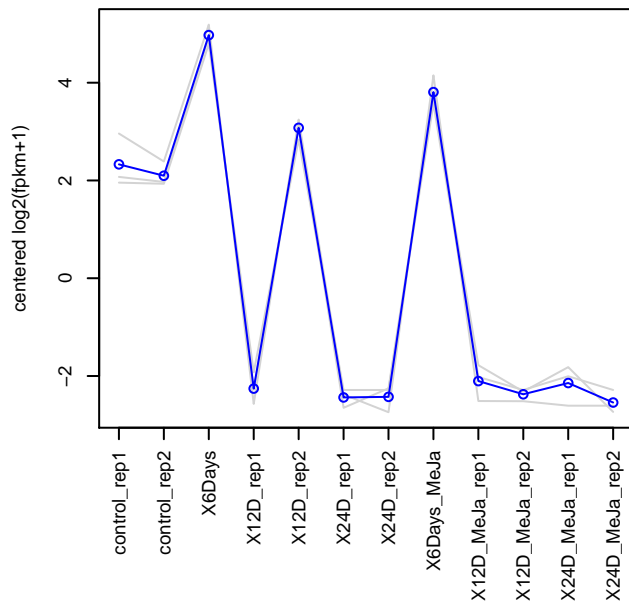

subcluster\_168\_log2\_medianCentered\_fpkm.matrix, 19 tra subcluster\_169\_log2\_medianCentered\_fpkm.matrix, 4 tra

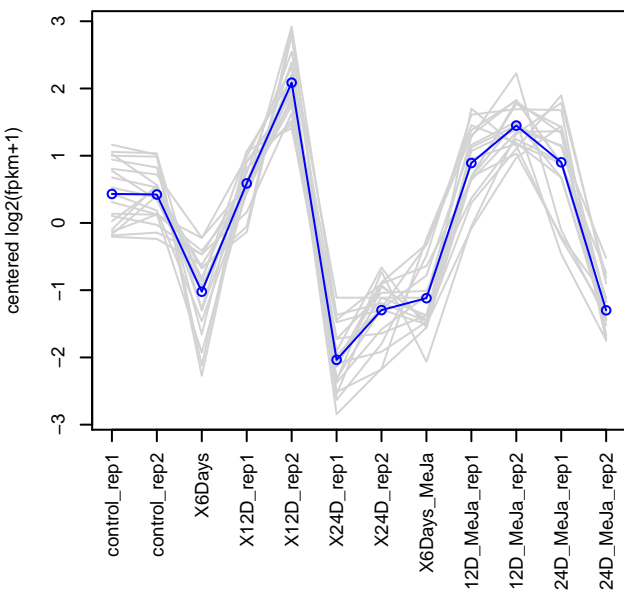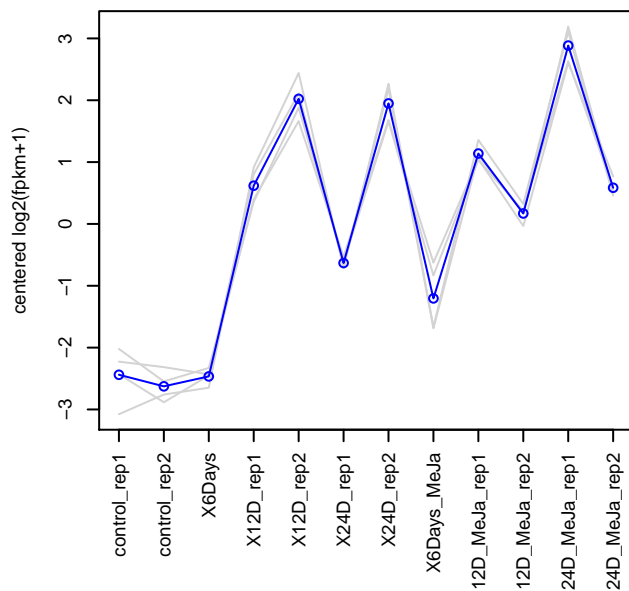

subcluster\_16\_log2\_medianCentered\_fpk.matrix, 44 tra subcluster\_170\_log2\_medianCentered\_fpk.matrix, 12 tra

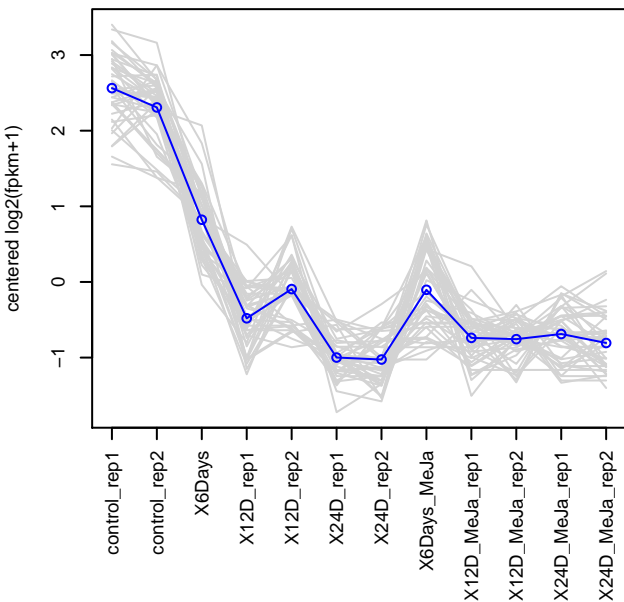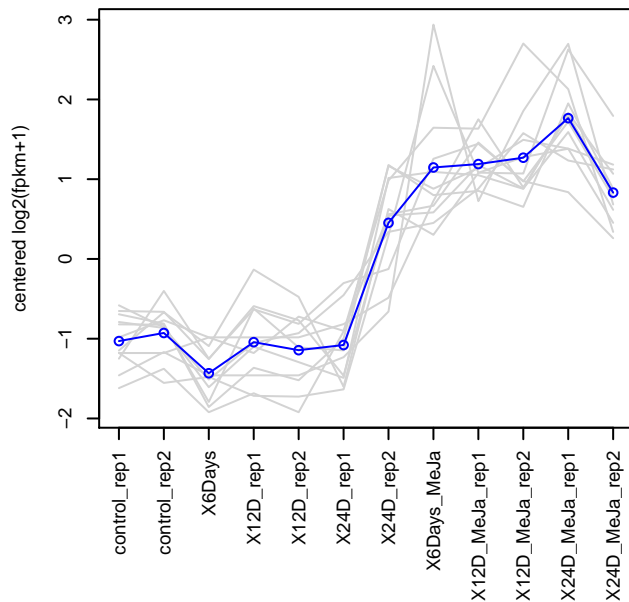

subcluster\_171\_log2\_medianCentered\_fpk.matrix, 31 tra subcluster\_172\_log2\_medianCentered\_fpk.matrix, 9 tra

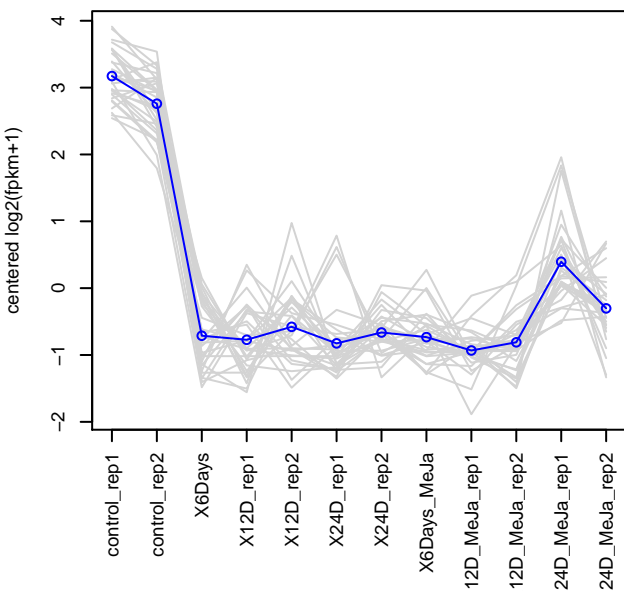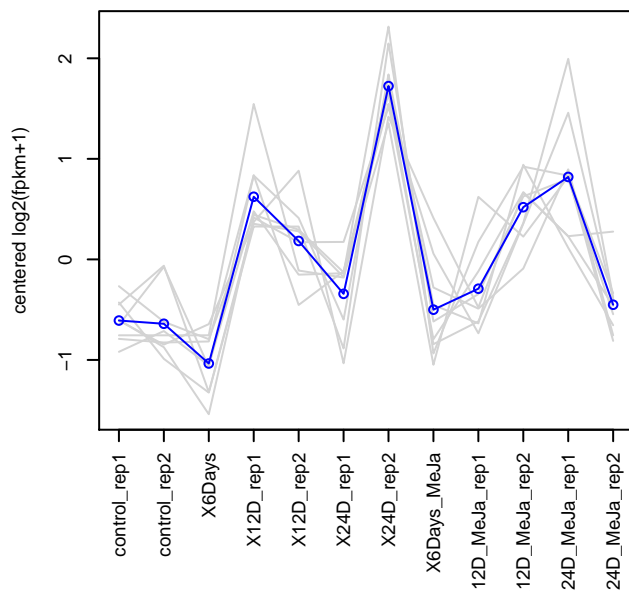

subcluster\_173\_log2\_medianCentered\_fpkm.matrix, 8 tra subcluster\_174\_log2\_medianCentered\_fpkm.matrix, 2 tra

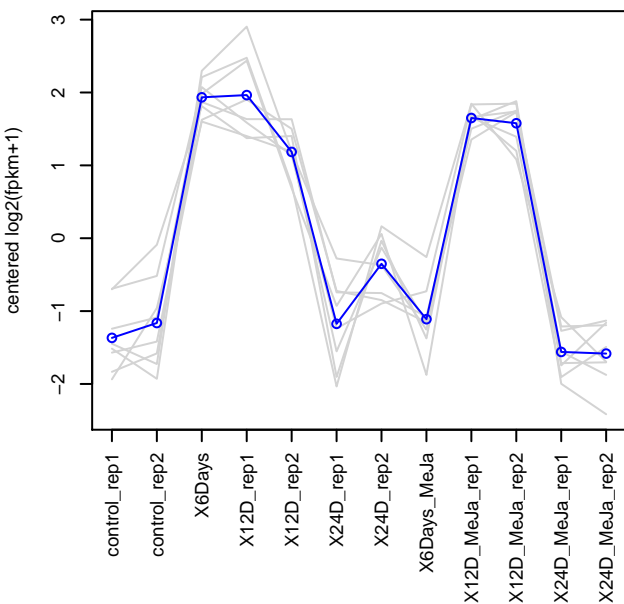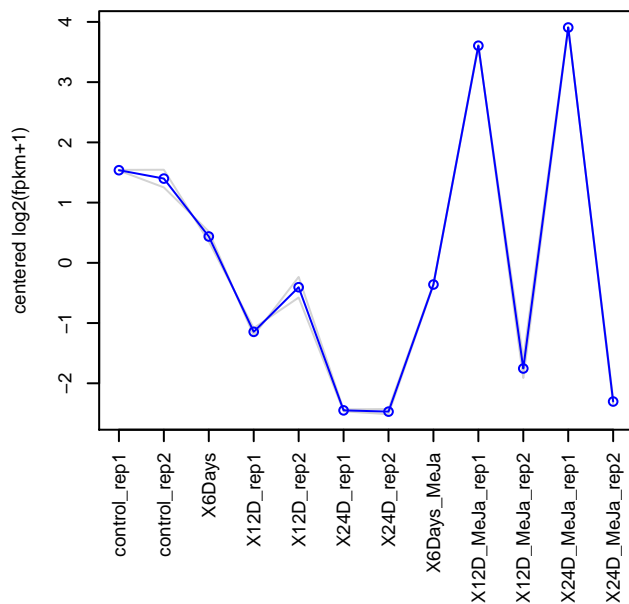

subcluster\_175\_log2\_medianCentered\_fpkm.matrix, 25 tra subcluster\_176\_log2\_medianCentered\_fpkm.matrix, 29 tra

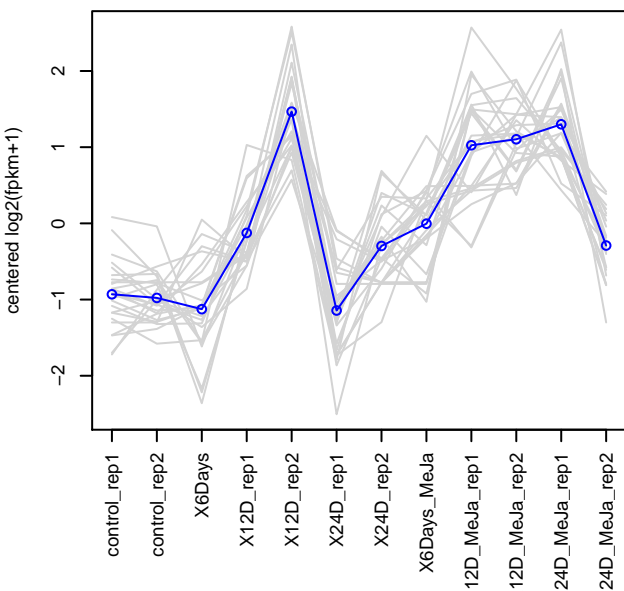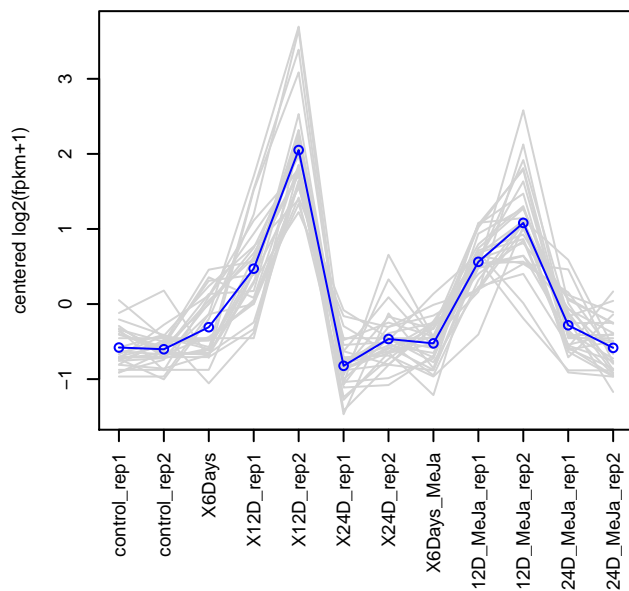

subcluster\_177\_log2\_medianCentered\_fpk.m.matrix, 20 tr; subcluster\_178\_log2\_medianCentered\_fpk.m.matrix, 30 tr

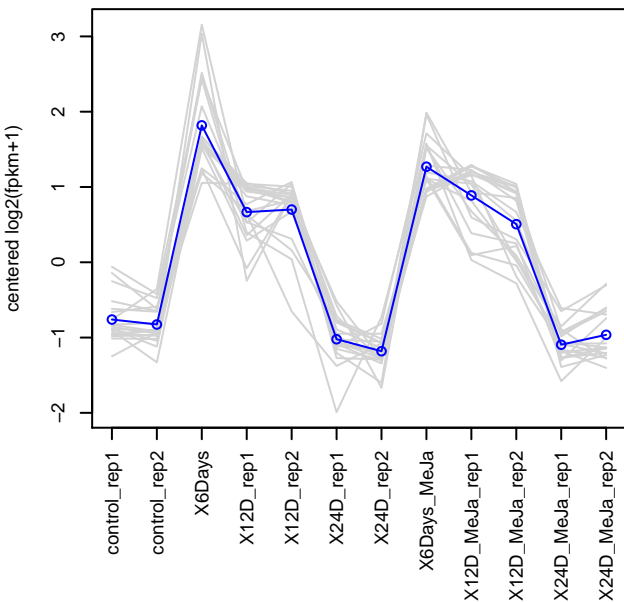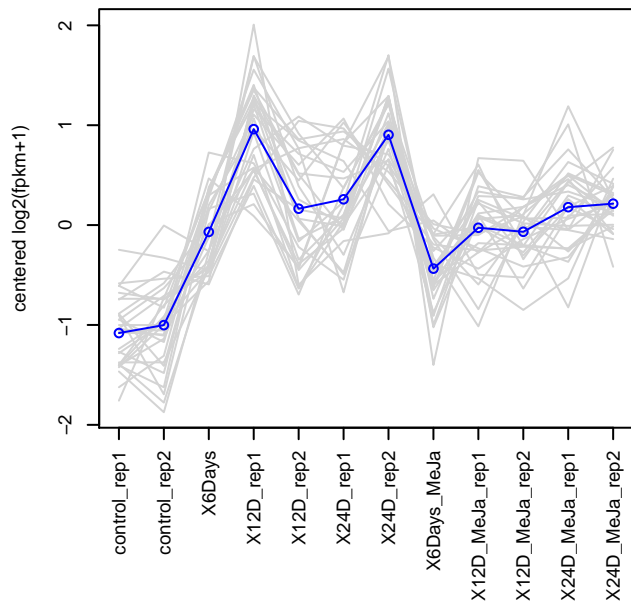

subcluster\_179\_log2\_medianCentered\_fpk.m.matrix, 43 tr; subcluster\_17\_log2\_medianCentered\_fpk.m.matrix, 380 tr

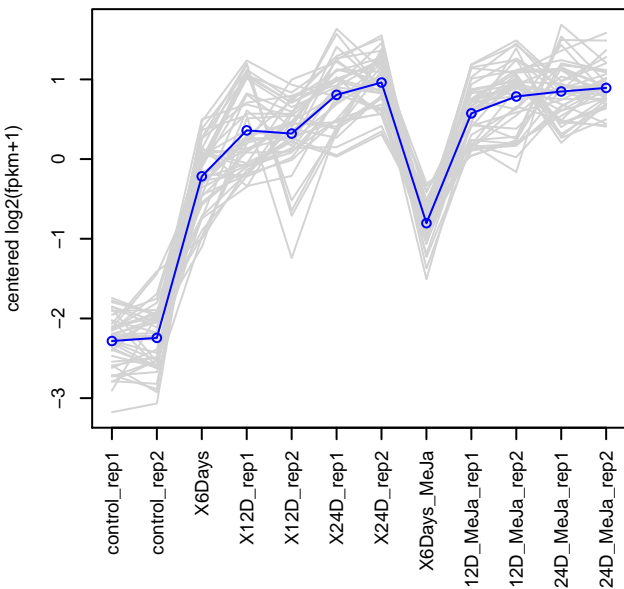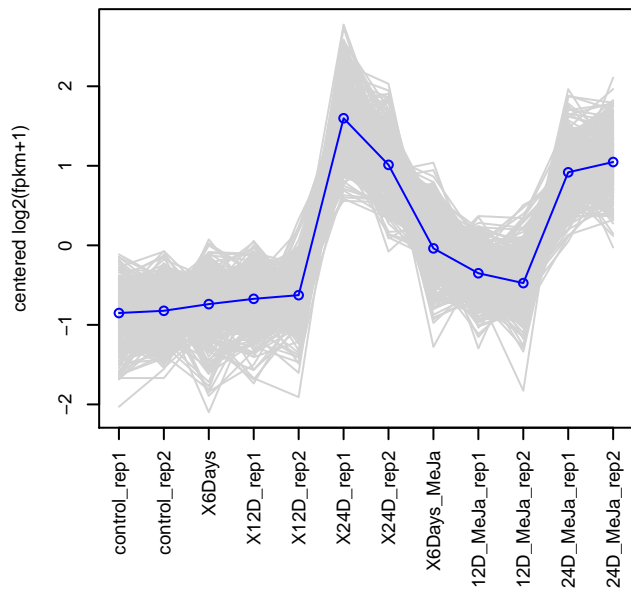

subcluster\_180\_log2\_medianCentered\_fpkm.matrix, 9 tra

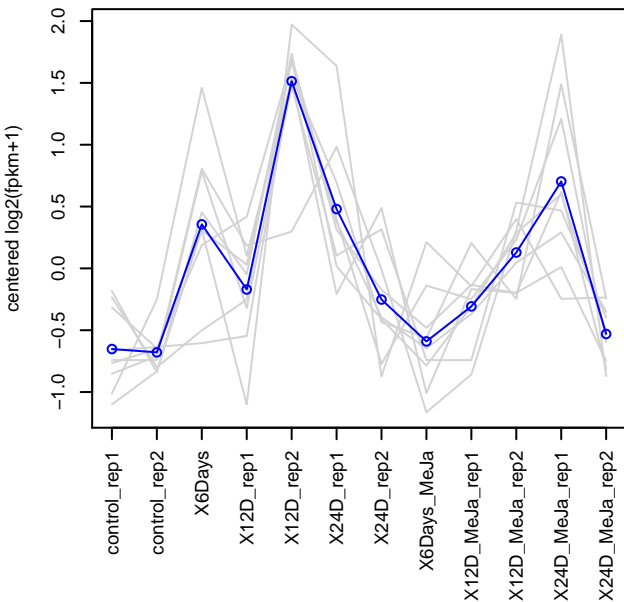

subcluster\_181\_log2\_medianCentered\_fpkm.matrix, 13 tra

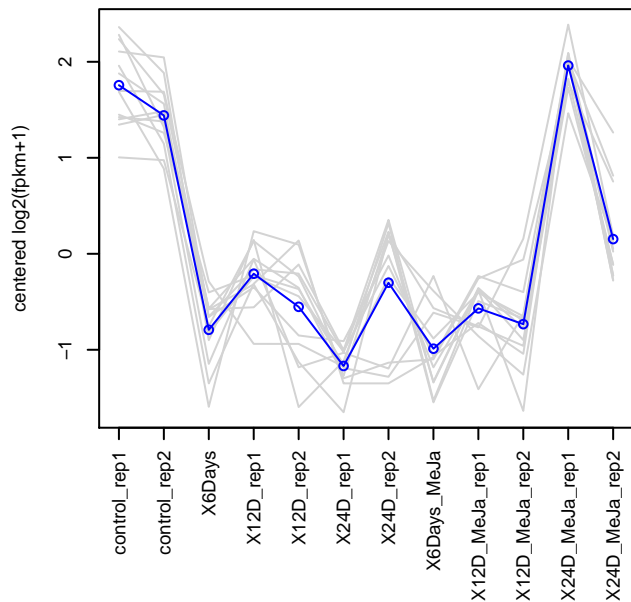

subcluster\_182\_log2\_medianCentered\_fpkm.matrix, 5 tra

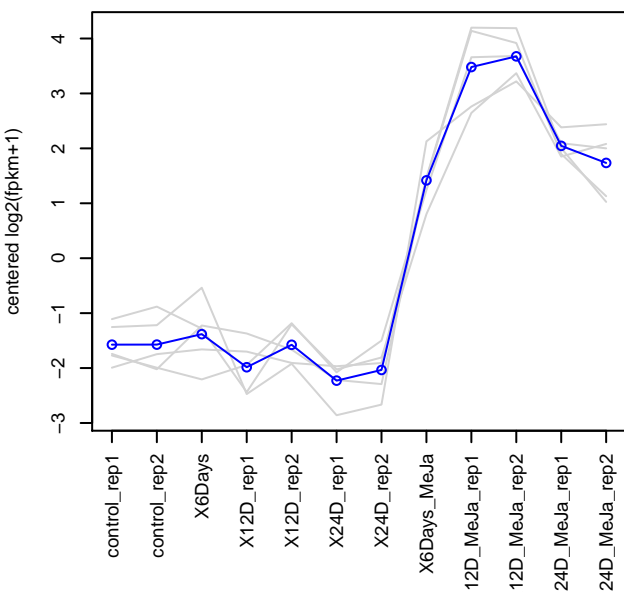

subcluster\_183\_log2\_medianCentered\_fpkm.matrix, 31 tra

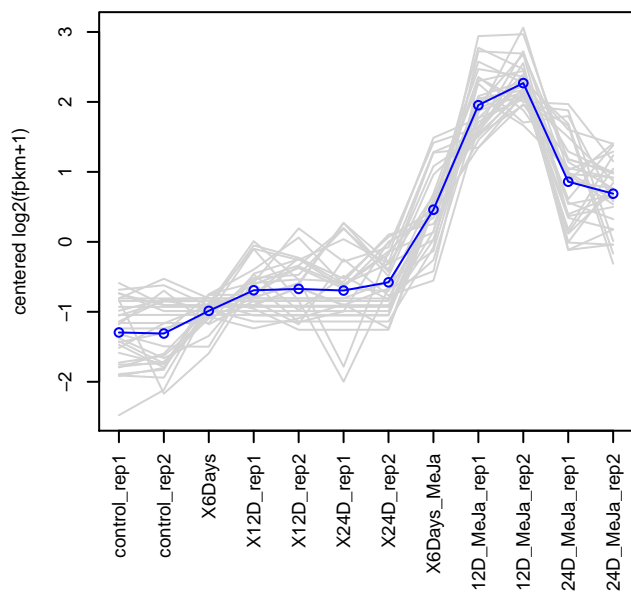

subcluster\_184\_log2\_medianCentered\_fpk.m.matrix, 4 tra

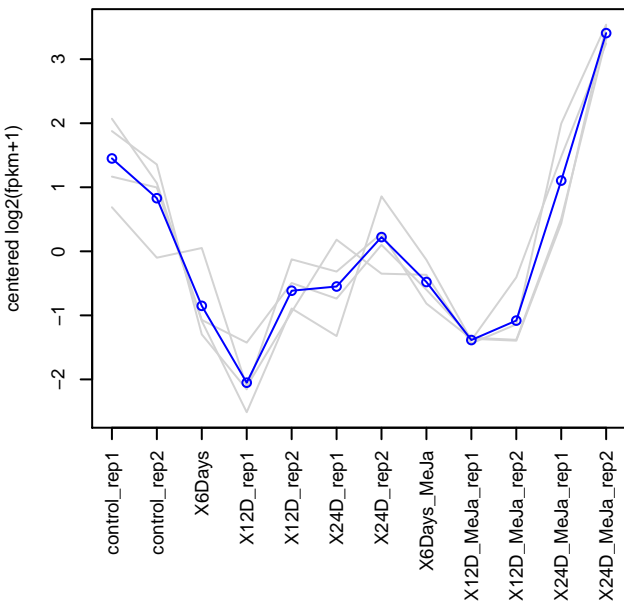

subcluster\_185\_log2\_medianCentered\_fpk.m.matrix, 20 tra

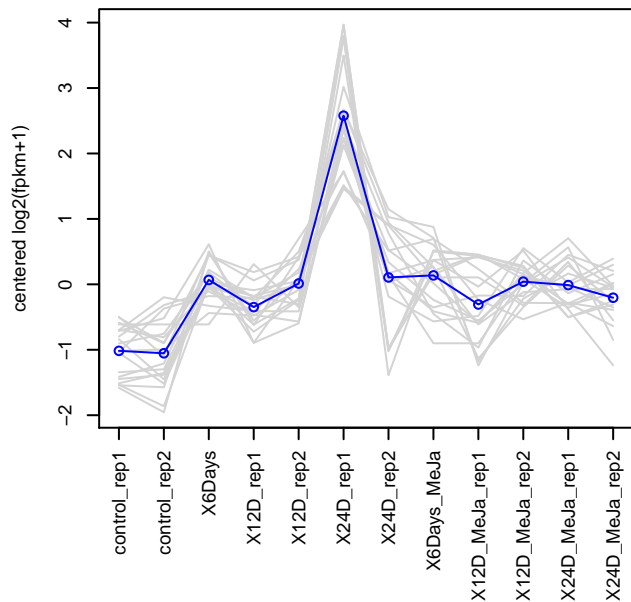

subcluster\_186\_log2\_medianCentered\_fpk.m.matrix, 10 tra

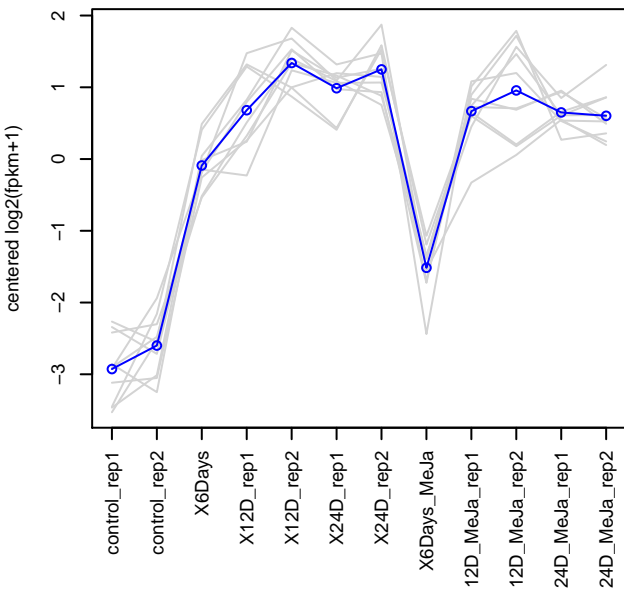

subcluster\_187\_log2\_medianCentered\_fpk.m.matrix, 1 tra

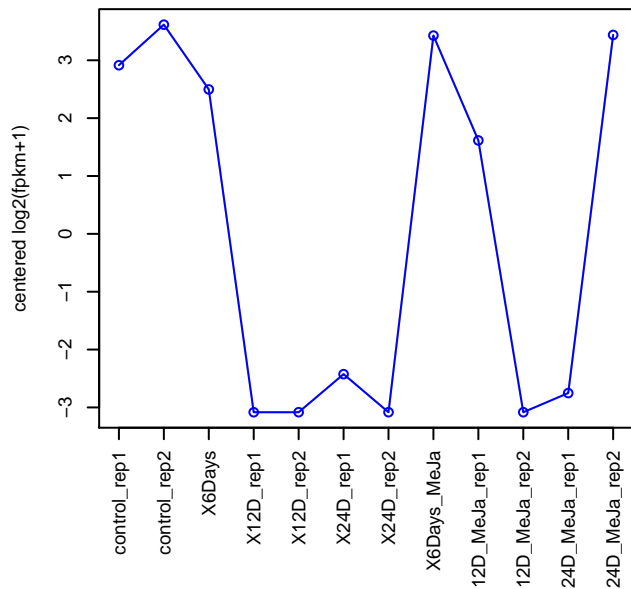



subcluster\_188\_log2\_medianCentered\_fpk.matrix, 21 tra subcluster\_189\_log2\_medianCentered\_fpk.matrix, 9 tra

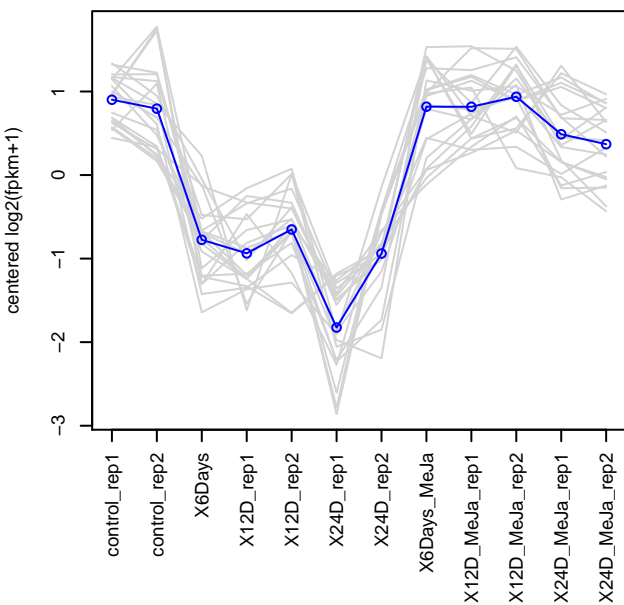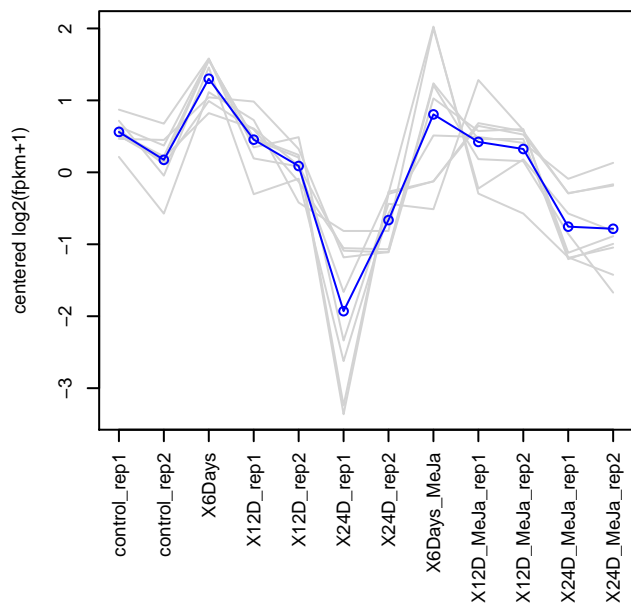

subcluster\_18\_log2\_medianCentered\_fpk.matrix, 15 tra subcluster\_190\_log2\_medianCentered\_fpk.matrix, 14 tra

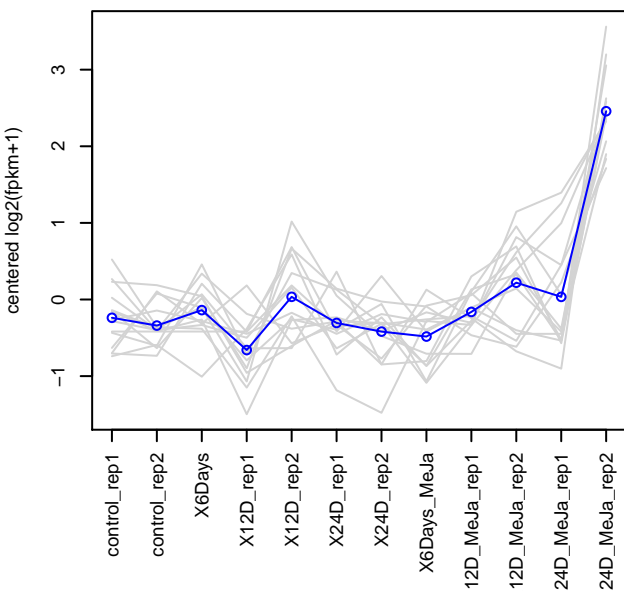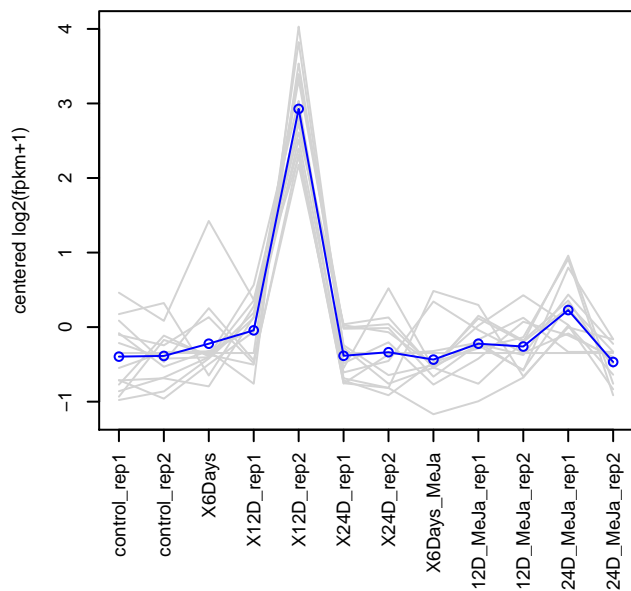

subcluster\_191\_log2\_medianCentered\_fpkm.matrix, 13 tr subcluster\_192\_log2\_medianCentered\_fpkm.matrix, 7 tr

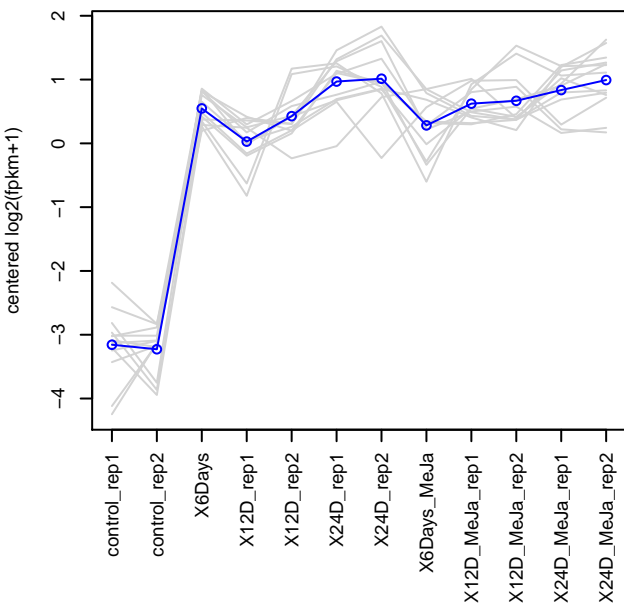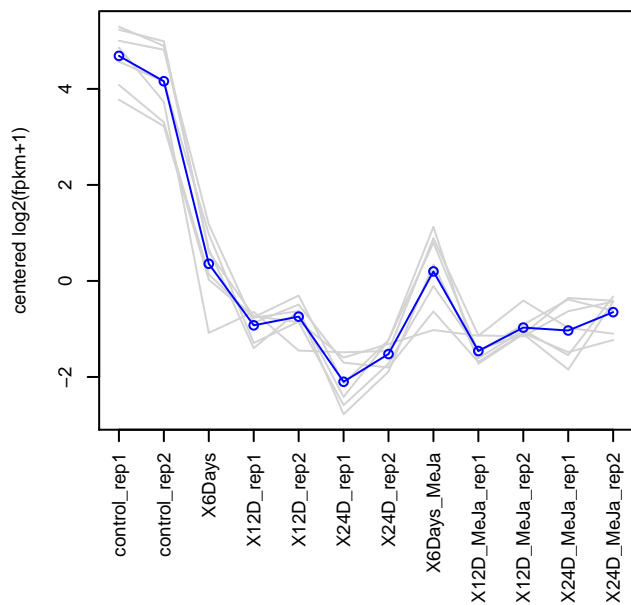

subcluster\_193\_log2\_medianCentered\_fpkm.matrix, 10 tr subcluster\_194\_log2\_medianCentered\_fpkm.matrix, 11 tr

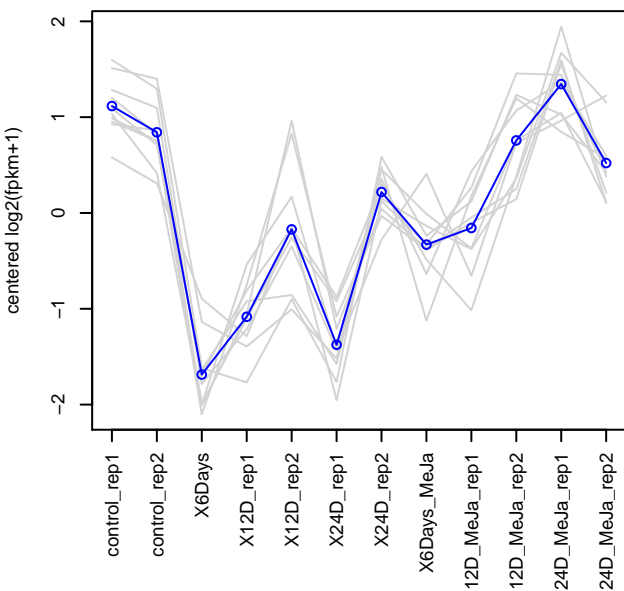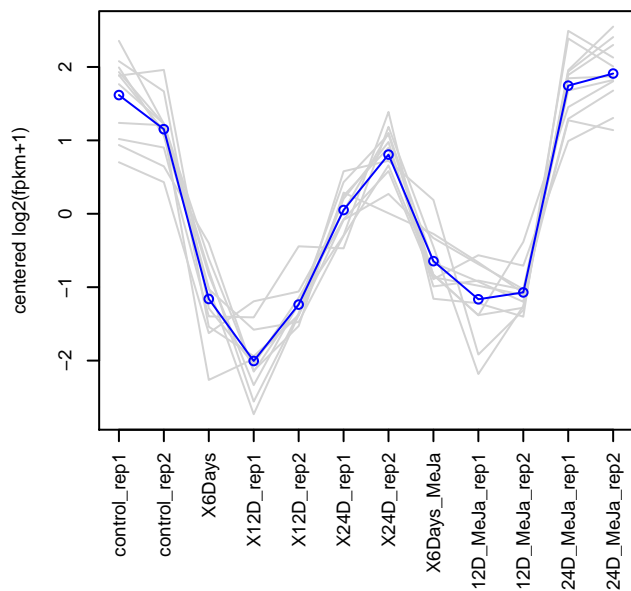

subcluster\_195\_log2\_medianCentered\_fpkm.matrix, 9 tra

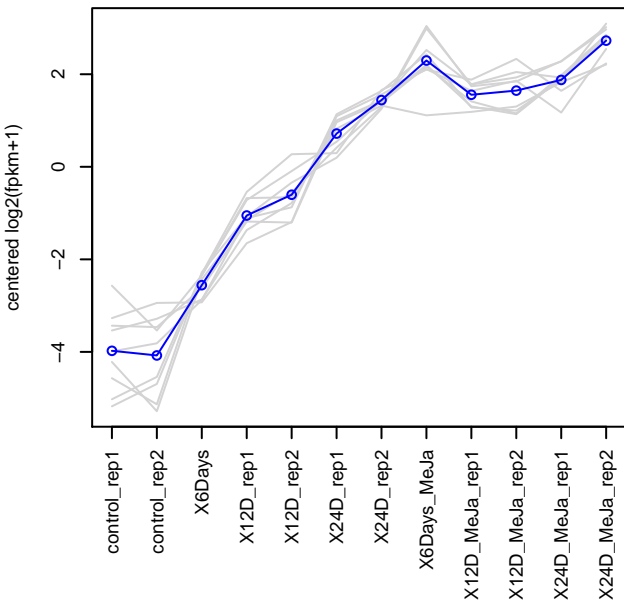

subcluster\_196\_log2\_medianCentered\_fpkm.matrix, 3 tra

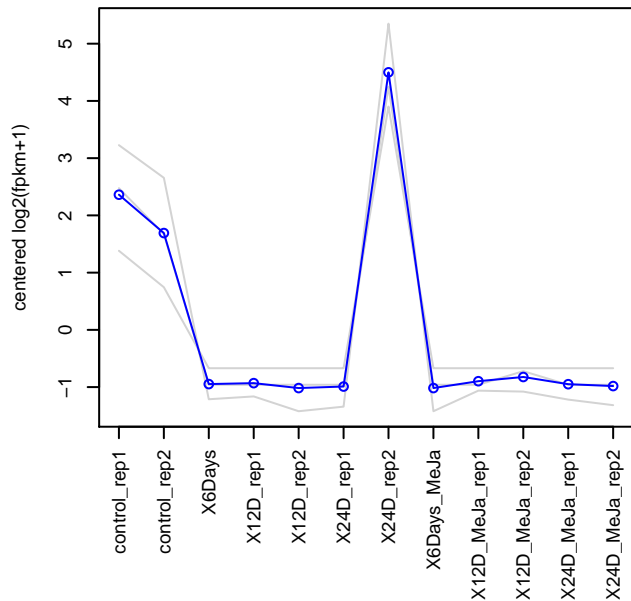

subcluster\_197\_log2\_medianCentered\_fpkm.matrix, 9 tra

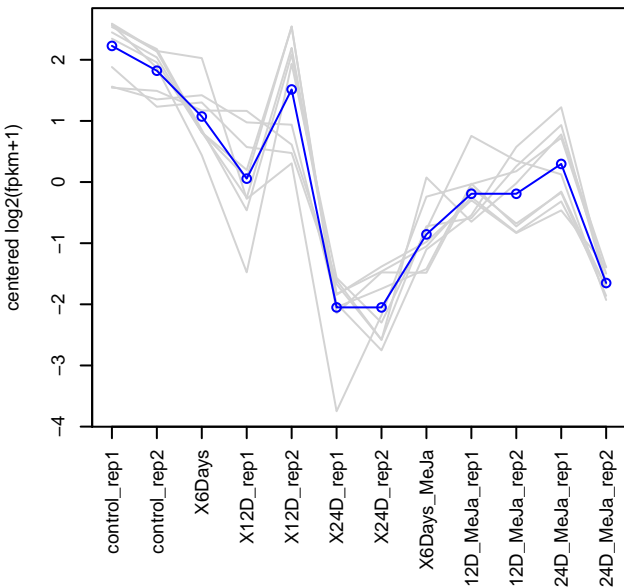

subcluster\_198\_log2\_medianCentered\_fpkm.matrix, 3 tra

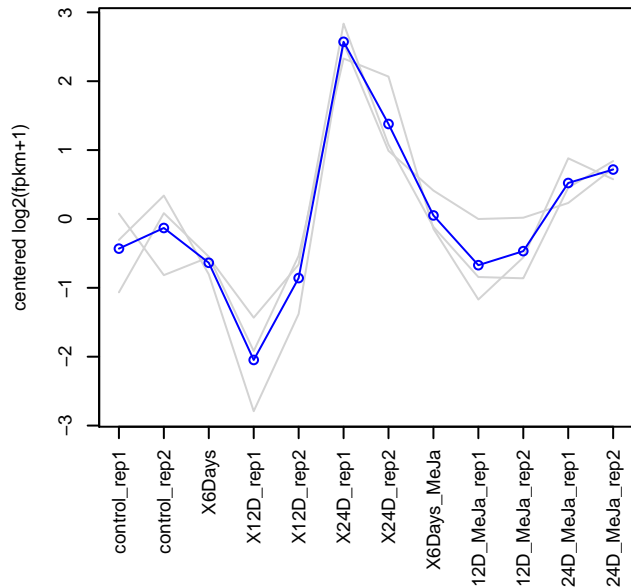

subcluster\_199\_log2\_medianCentered\_fpkm.matrix, 10 tra subcluster\_19\_log2\_medianCentered\_fpkm.matrix, 335 tra

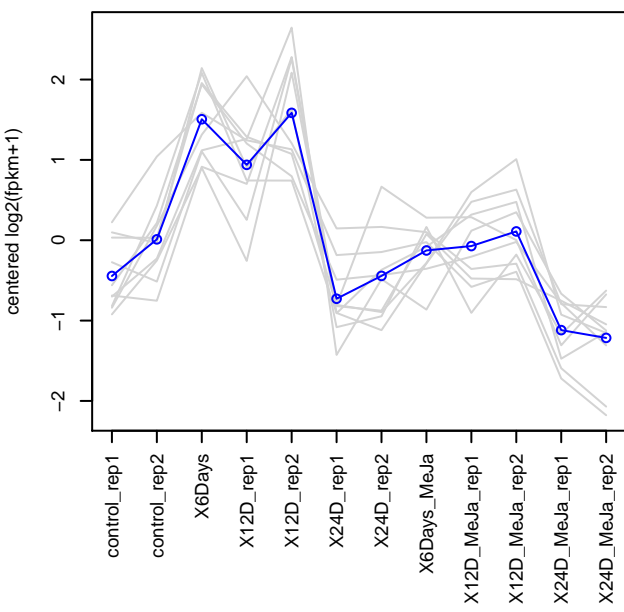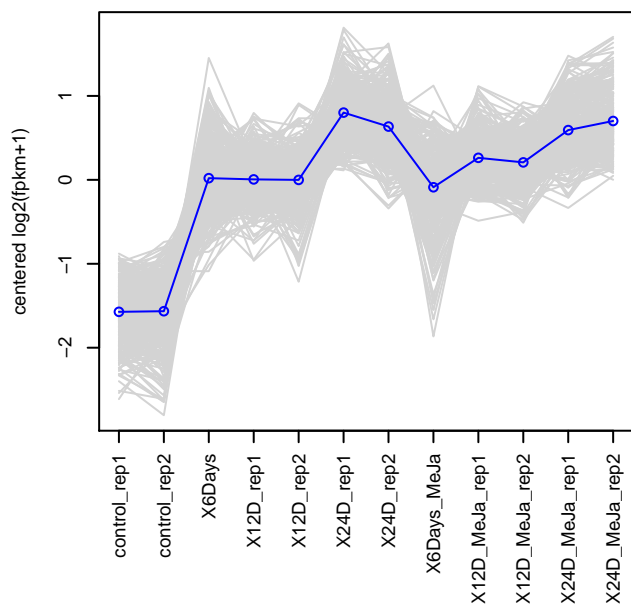

subcluster\_1\_log2\_medianCentered\_fpkm.matrix, 56 tra subcluster\_200\_log2\_medianCentered\_fpkm.matrix, 15 tra

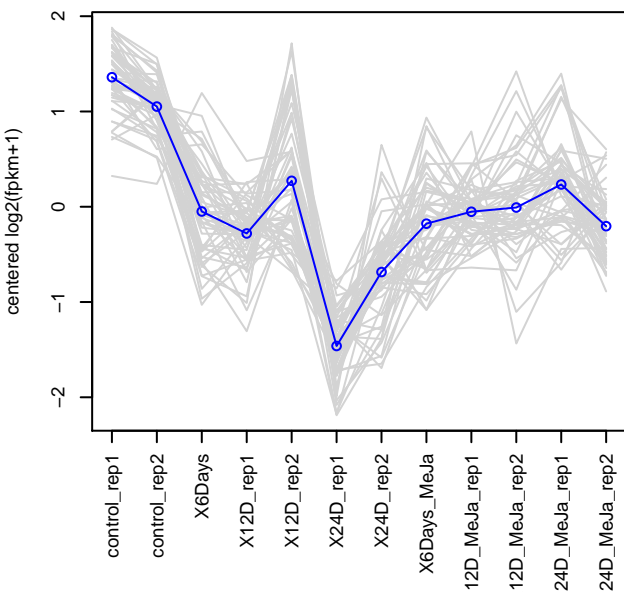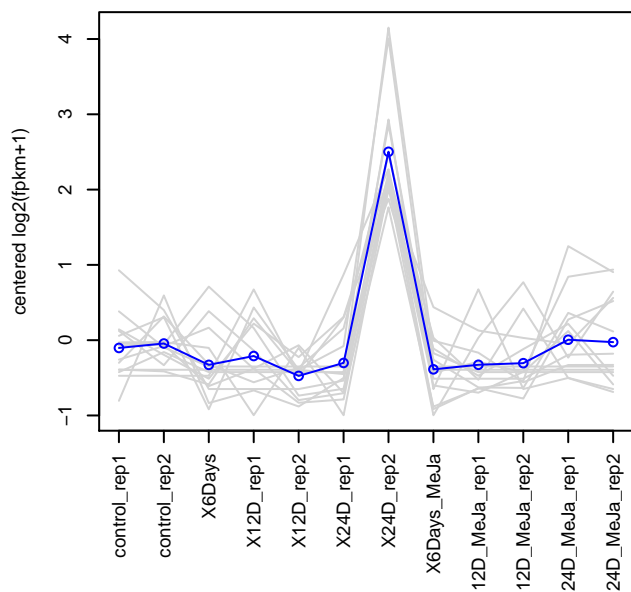

subcluster\_201\_log2\_medianCentered\_fpkm.matrix, 3 tra subcluster\_202\_log2\_medianCentered\_fpkm.matrix, 2 tra

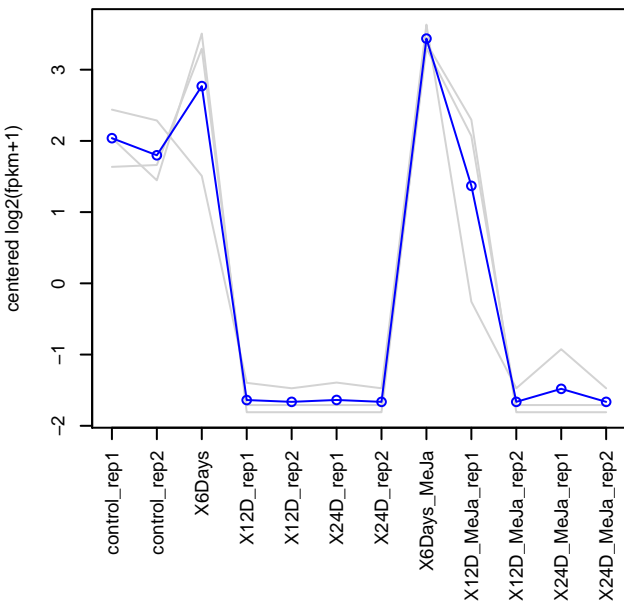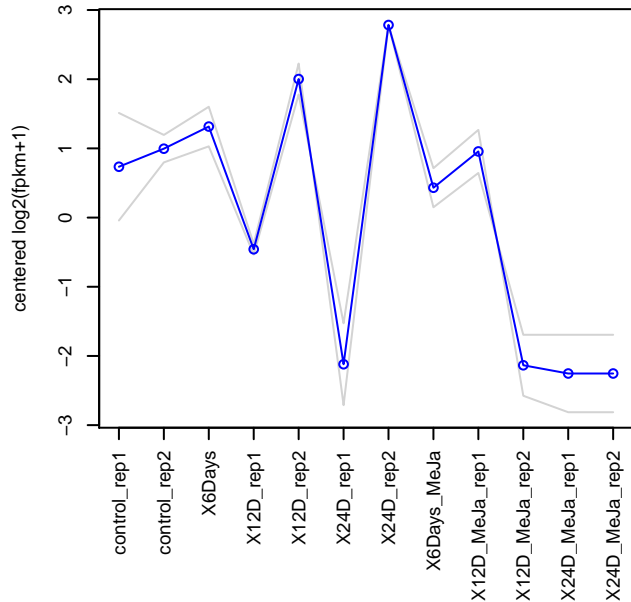

subcluster\_203\_log2\_medianCentered\_fpkm.matrix, 8 tra subcluster\_204\_log2\_medianCentered\_fpkm.matrix, 7 tra

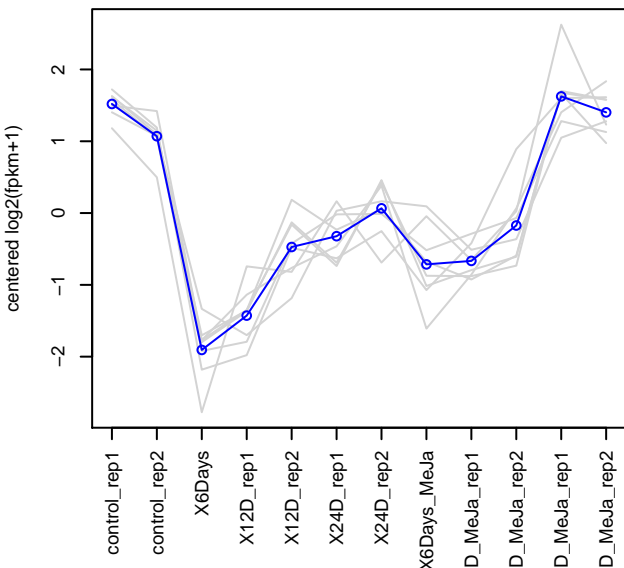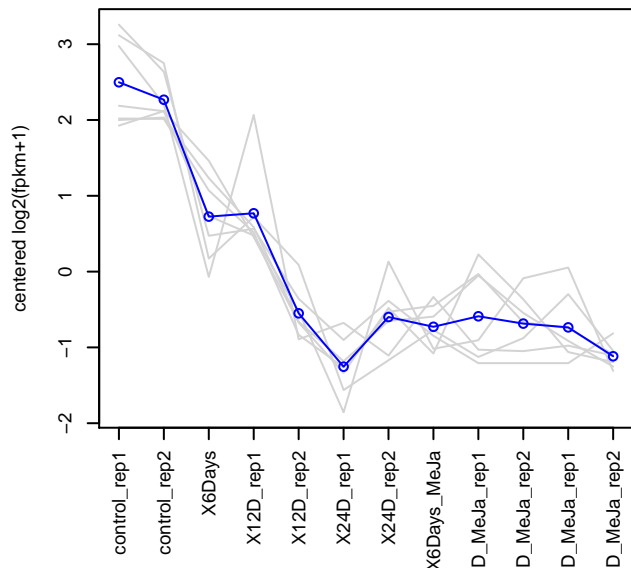

subcluster\_205\_log2\_medianCentered\_fpkm.matrix, 15 tr subcluster\_206\_log2\_medianCentered\_fpkm.matrix, 6 tr

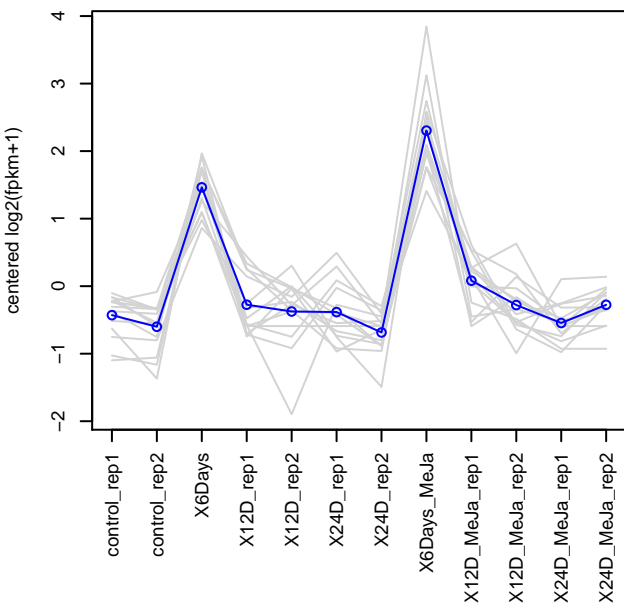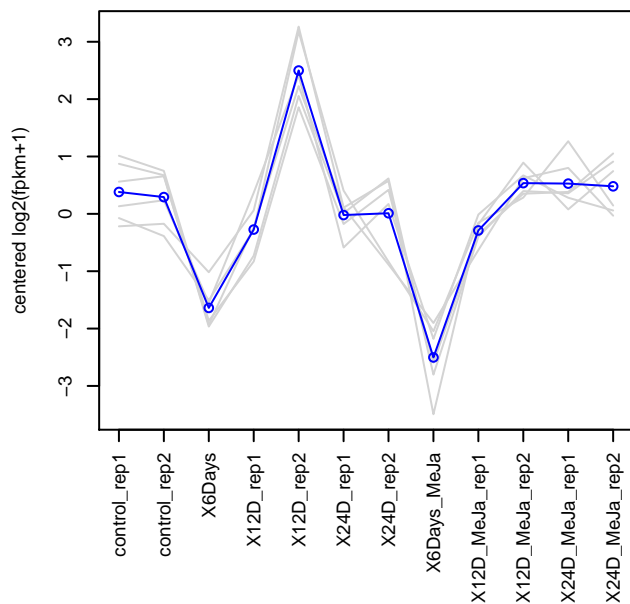

subcluster\_207\_log2\_medianCentered\_fpkm.matrix, 45 tr subcluster\_208\_log2\_medianCentered\_fpkm.matrix, 3 tr

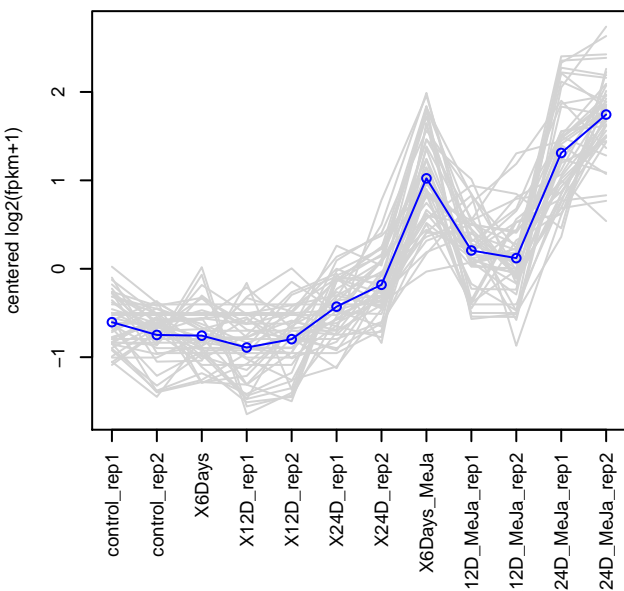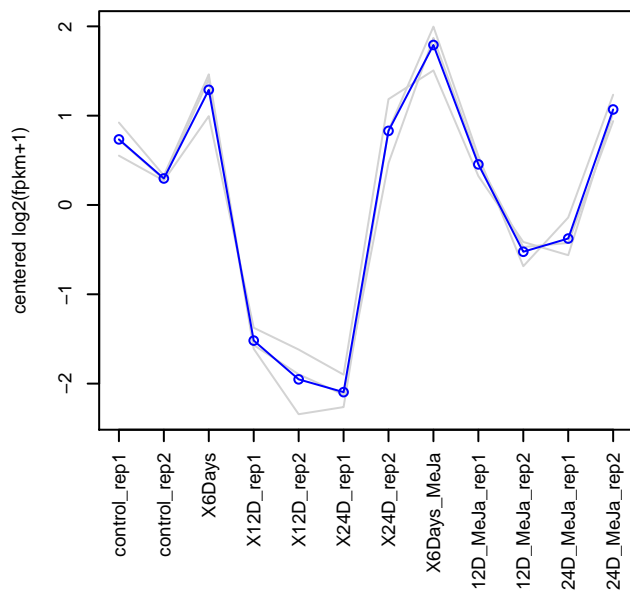

subcluster\_209\_log2\_medianCentered\_fpkm.matrix, 6 tra subcluster\_20\_log2\_medianCentered\_fpkm.matrix, 17 tra

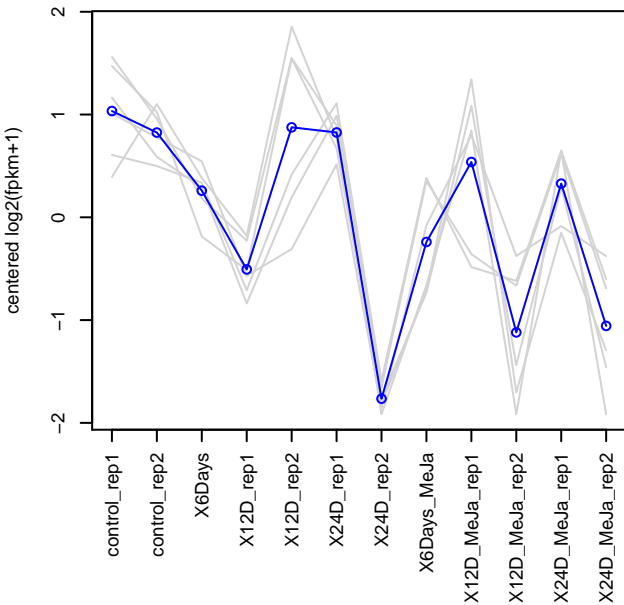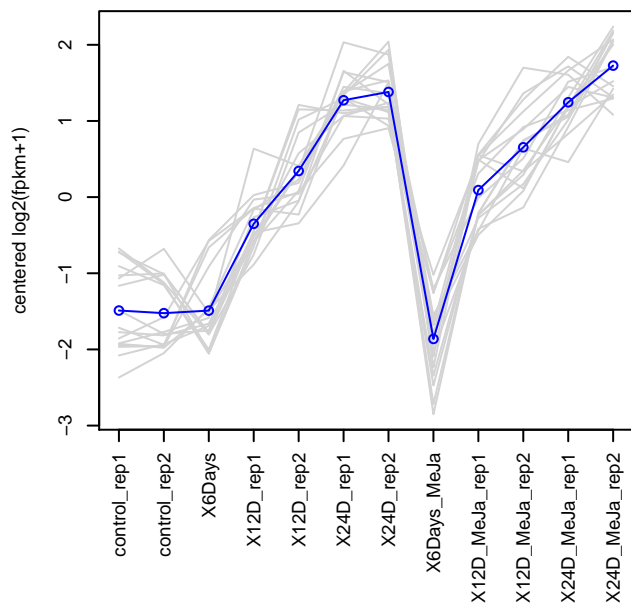

subcluster\_210\_log2\_medianCentered\_fpkm.matrix, 7 tra subcluster\_211\_log2\_medianCentered\_fpkm.matrix, 12 tra

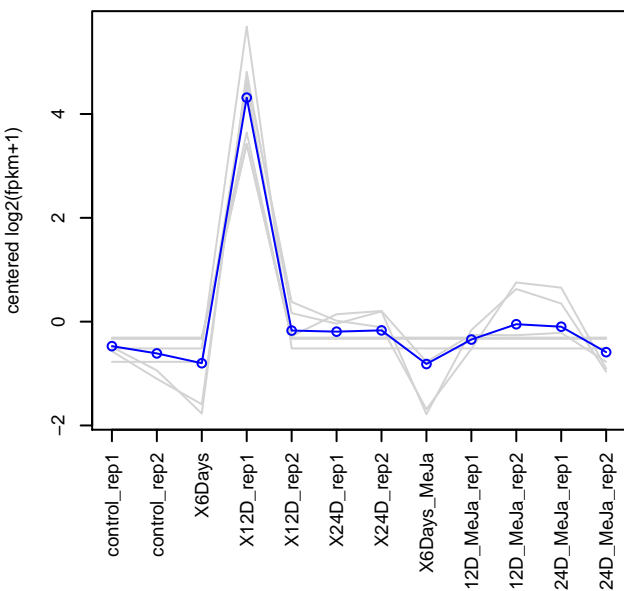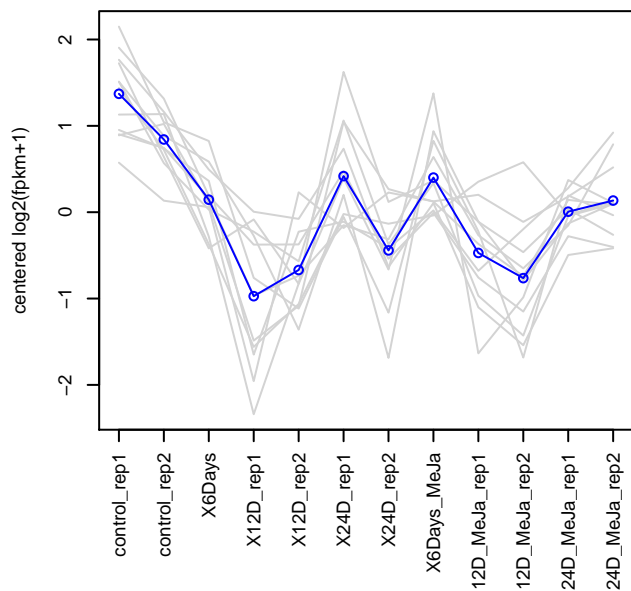

subcluster\_212\_log2\_medianCentered\_fpkm.matrix, 6 tra

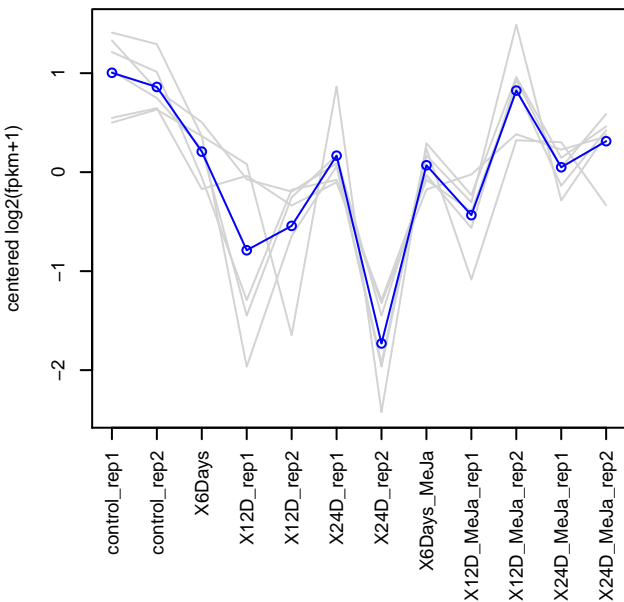

subcluster\_213\_log2\_medianCentered\_fpkm.matrix, 11 tra

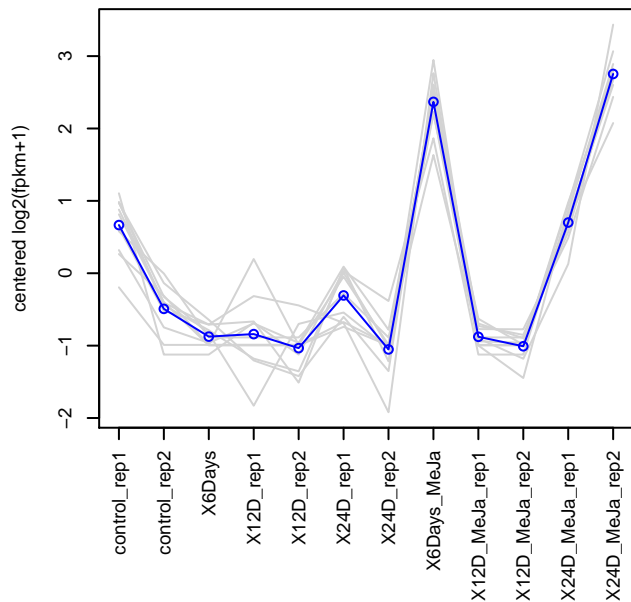

subcluster\_214\_log2\_medianCentered\_fpkm.matrix, 2 tra

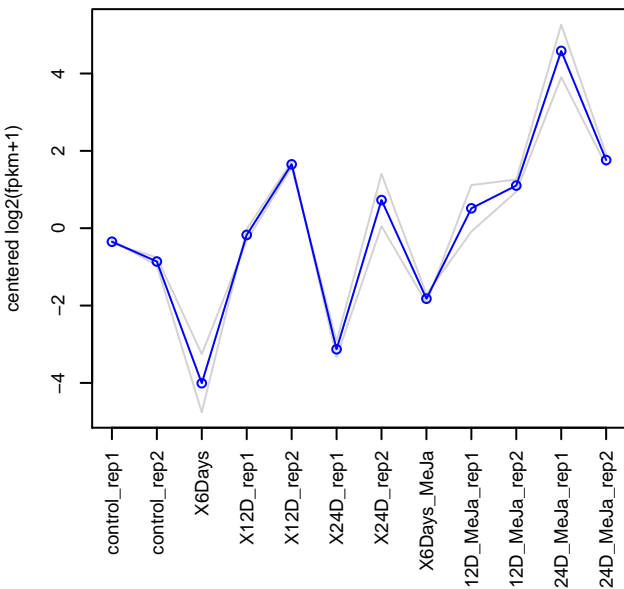

subcluster\_215\_log2\_medianCentered\_fpkm.matrix, 12 tra

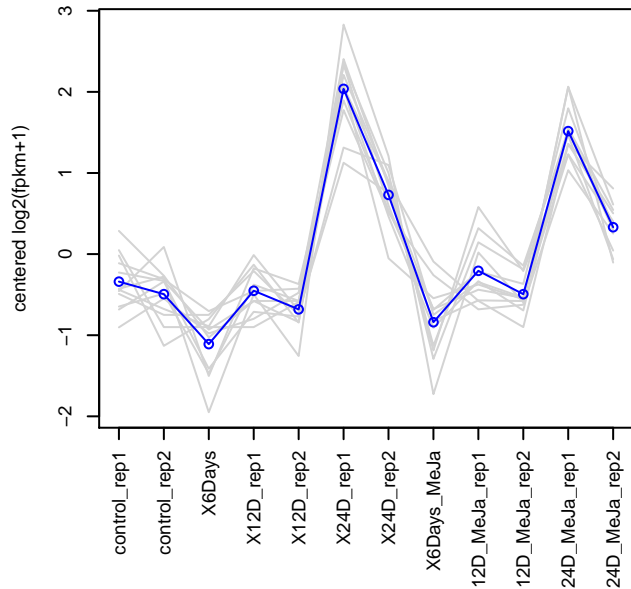



subcluster\_216\_log2\_medianCentered\_fpk.m.matrix, 14 tra

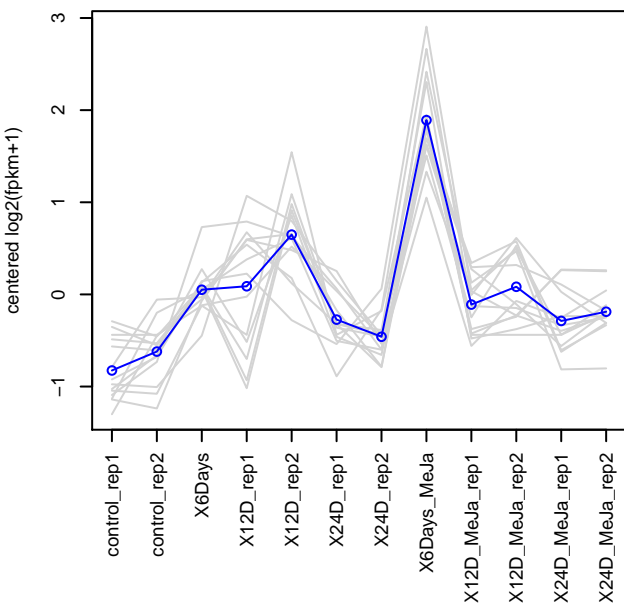

subcluster\_217\_log2\_medianCentered\_fpk.m.matrix, 3 tra

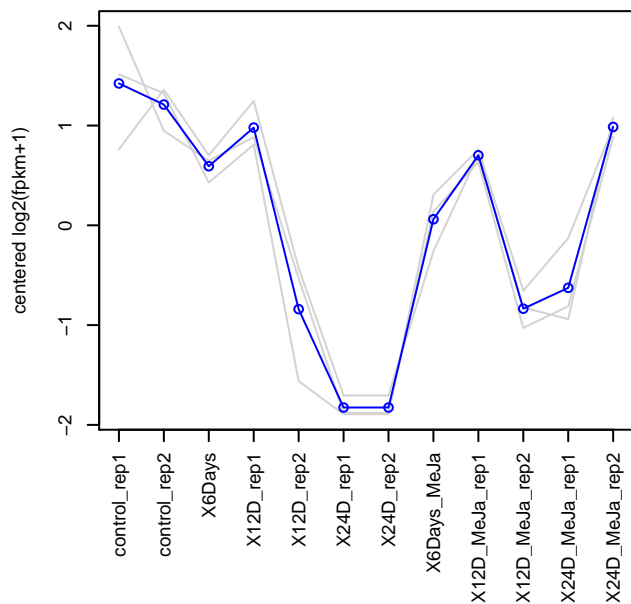

subcluster\_218\_log2\_medianCentered\_fpk.m.matrix, 4 tra

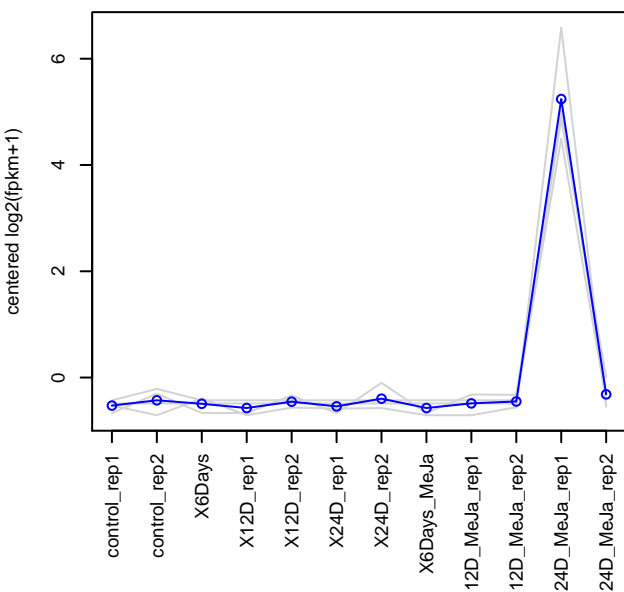

subcluster\_219\_log2\_medianCentered\_fpk.m.matrix, 19 tra

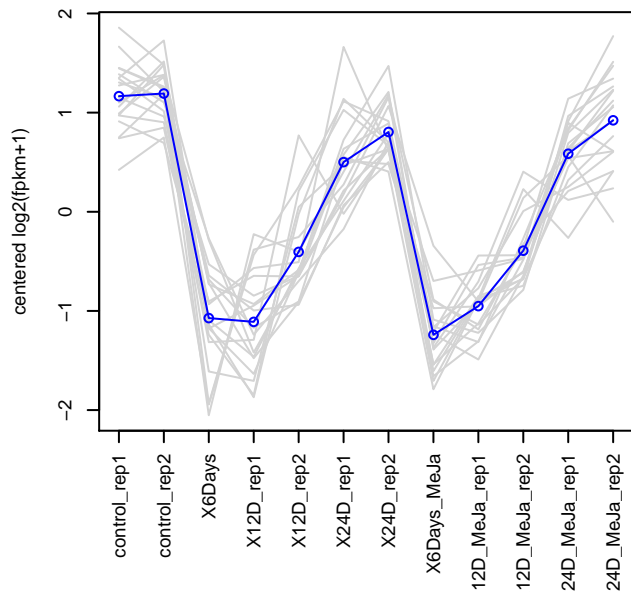

subcluster\_21\_log2\_medianCentered\_fpkm.matrix, 34 tra subcluster\_220\_log2\_medianCentered\_fpkm.matrix, 7 tra

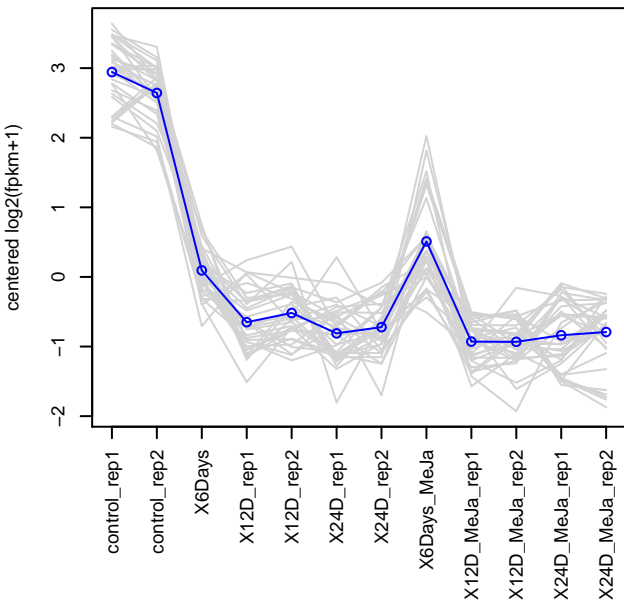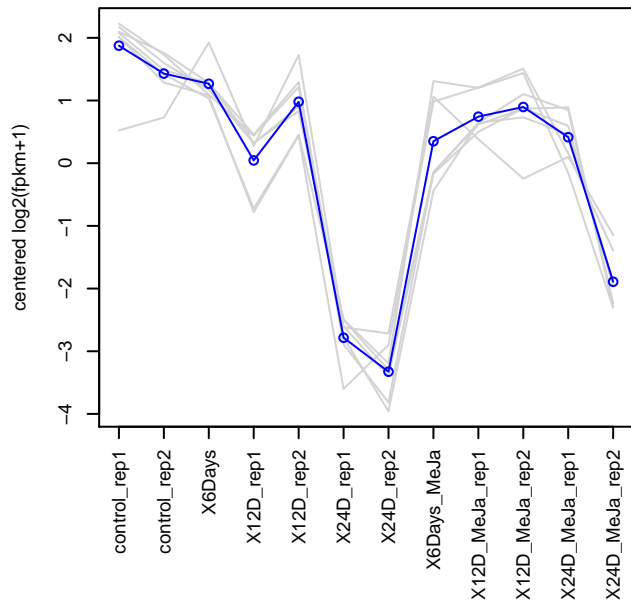

subcluster\_221\_log2\_medianCentered\_fpkm.matrix, 4 tra subcluster\_222\_log2\_medianCentered\_fpkm.matrix, 3 tra

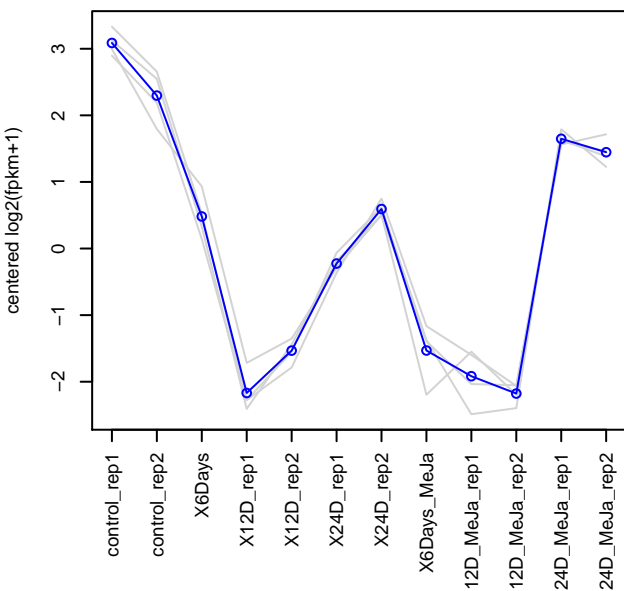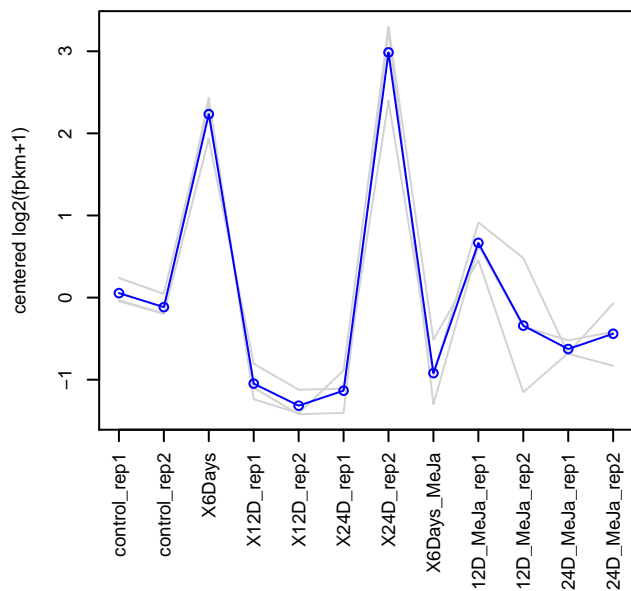

subcluster\_223\_log2\_medianCentered\_fpkm.matrix, 4 tra

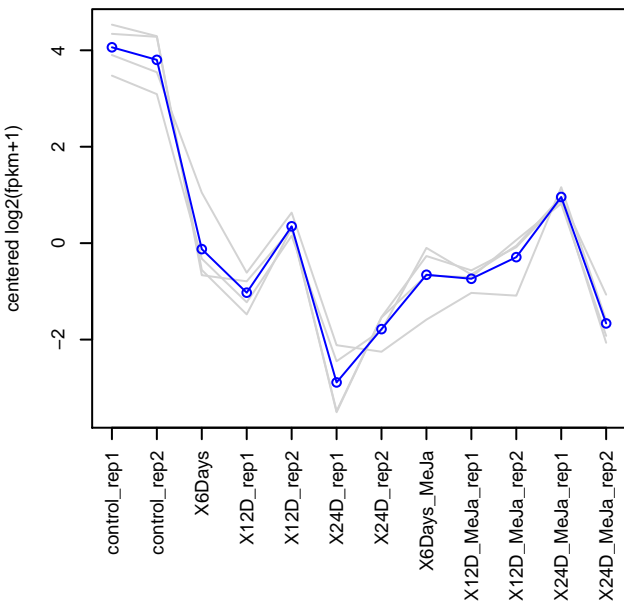

subcluster\_224\_log2\_medianCentered\_fpkm.matrix, 13 tra

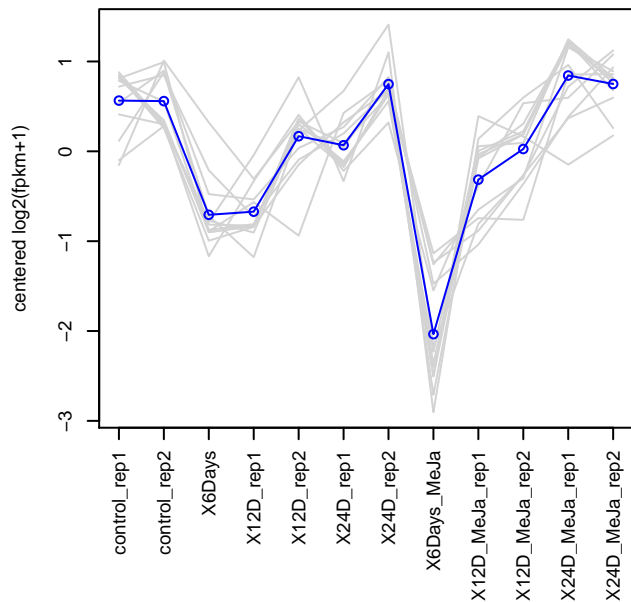

subcluster\_225\_log2\_medianCentered\_fpkm.matrix, 4 tra

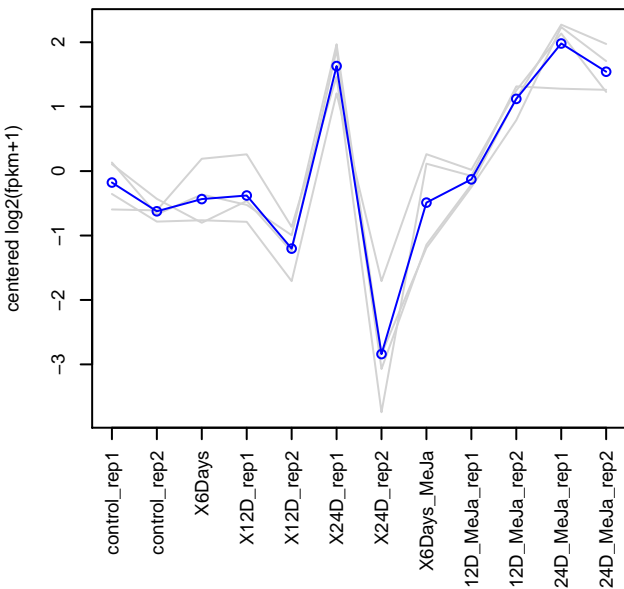

subcluster\_226\_log2\_medianCentered\_fpkm.matrix, 5 tra

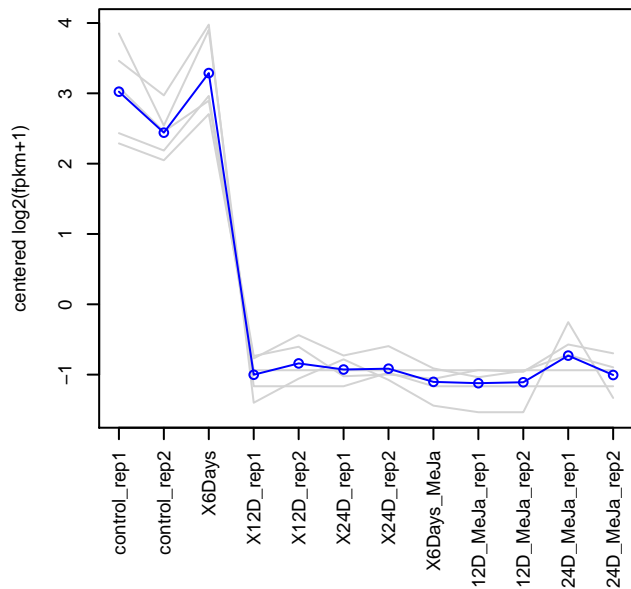

subcluster\_227\_log2\_medianCentered\_fpkm.matrix, 9 tra subcluster\_228\_log2\_medianCentered\_fpkm.matrix, 7 tra

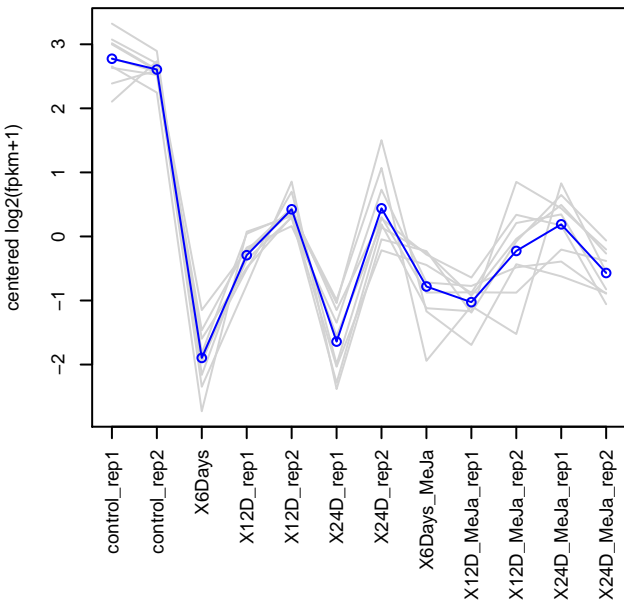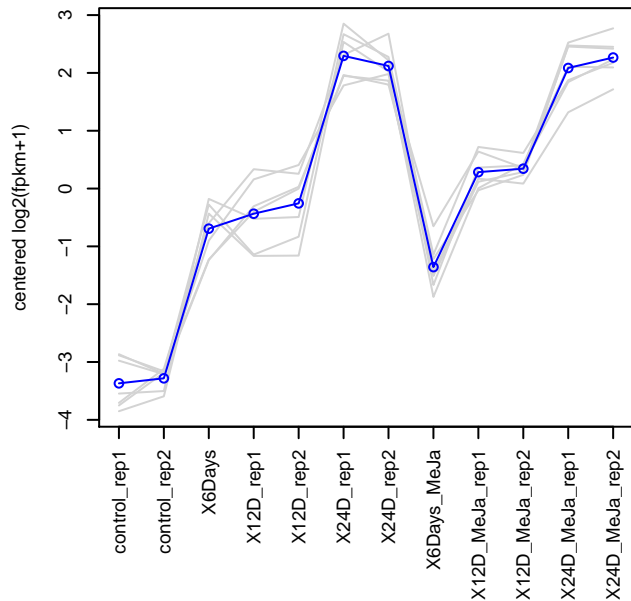

subcluster\_229\_log2\_medianCentered\_fpkm.matrix, 8 tra subcluster\_22\_log2\_medianCentered\_fpkm.matrix, 30 tra

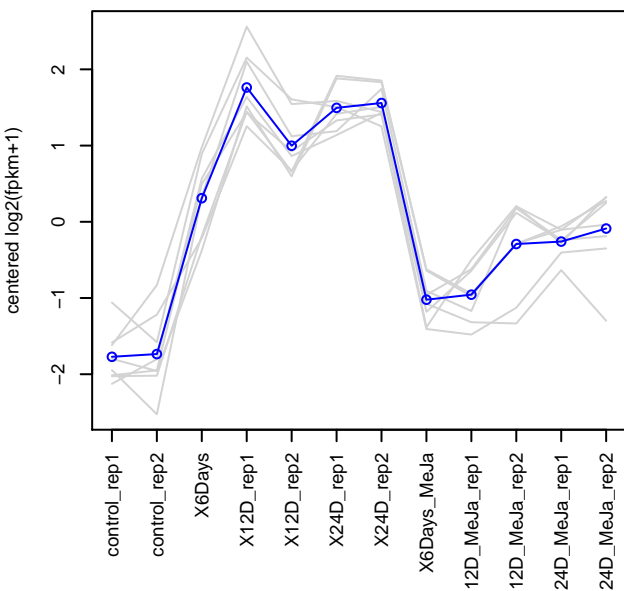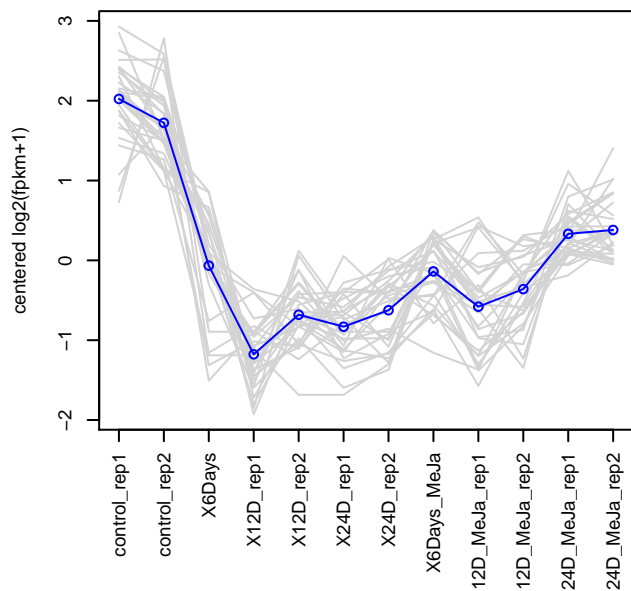

subcluster\_230\_log2\_medianCentered\_fpkm.matrix, 6 tra subcluster\_231\_log2\_medianCentered\_fpkm.matrix, 6 tra

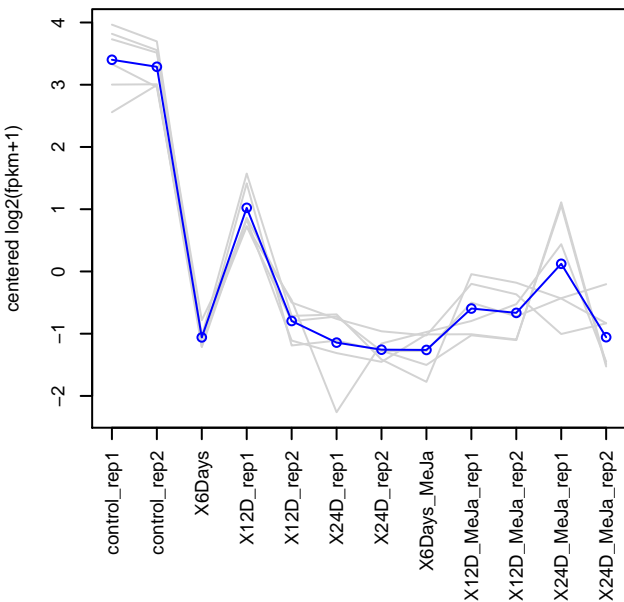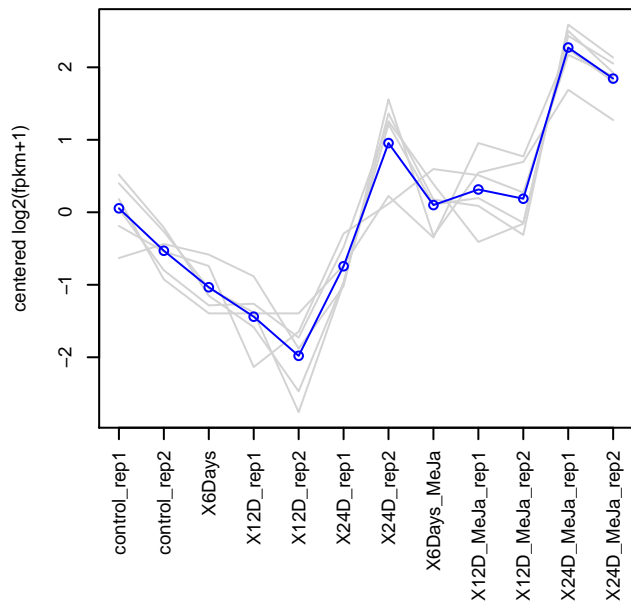

subcluster\_232\_log2\_medianCentered\_fpkm.matrix, 8 tra subcluster\_233\_log2\_medianCentered\_fpkm.matrix, 3 tra

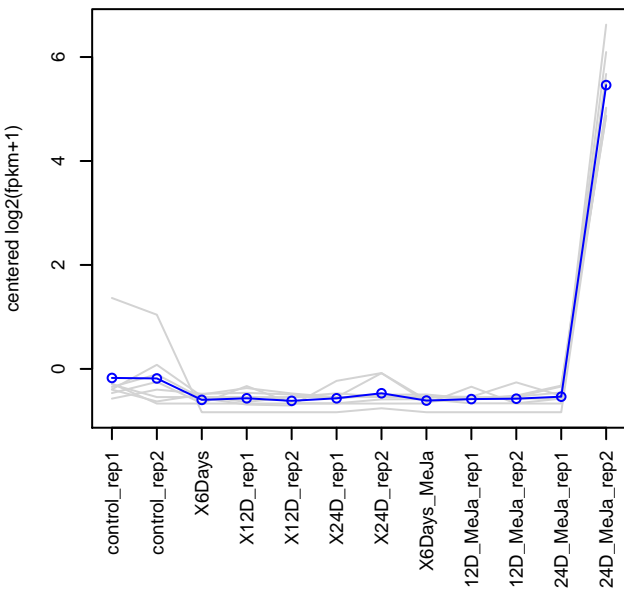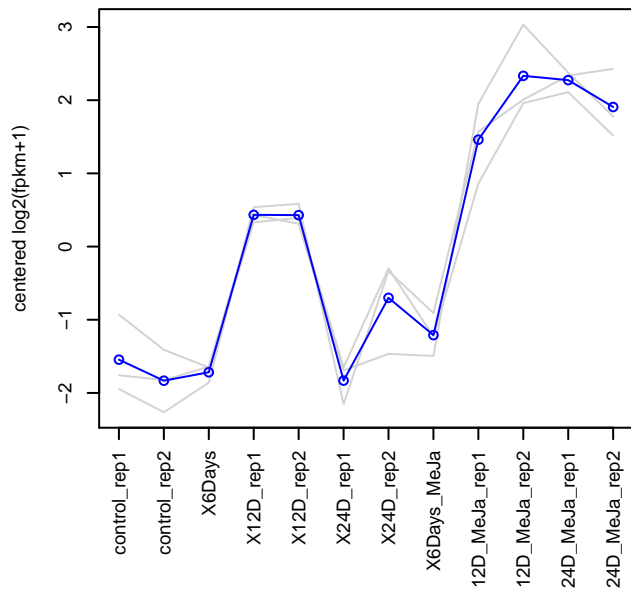

subcluster\_234\_log2\_medianCentered\_fpkm.matrix, 8 tra subcluster\_235\_log2\_medianCentered\_fpkm.matrix, 4 tra

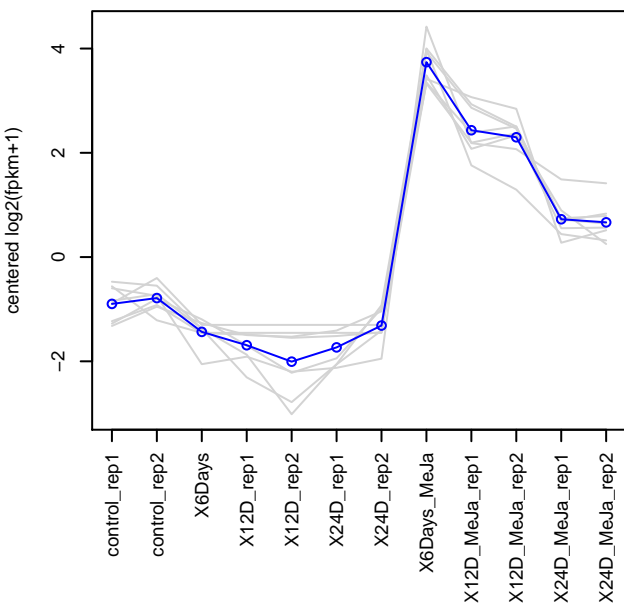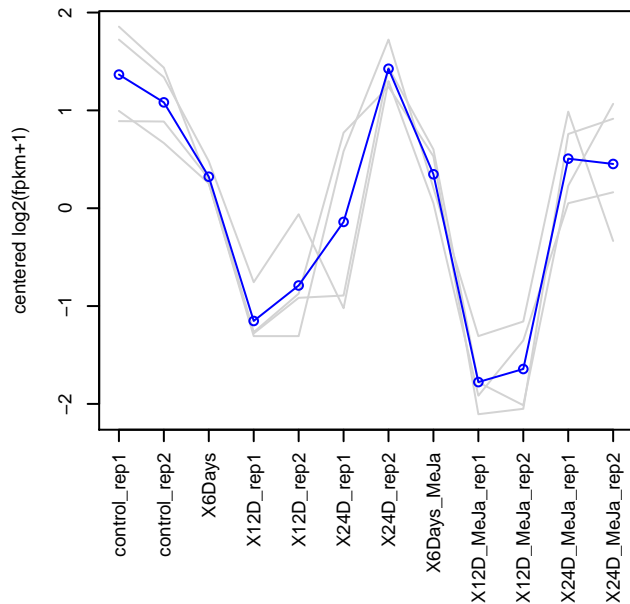

subcluster\_236\_log2\_medianCentered\_fpkm.matrix, 16 tra subcluster\_237\_log2\_medianCentered\_fpkm.matrix, 1 tra

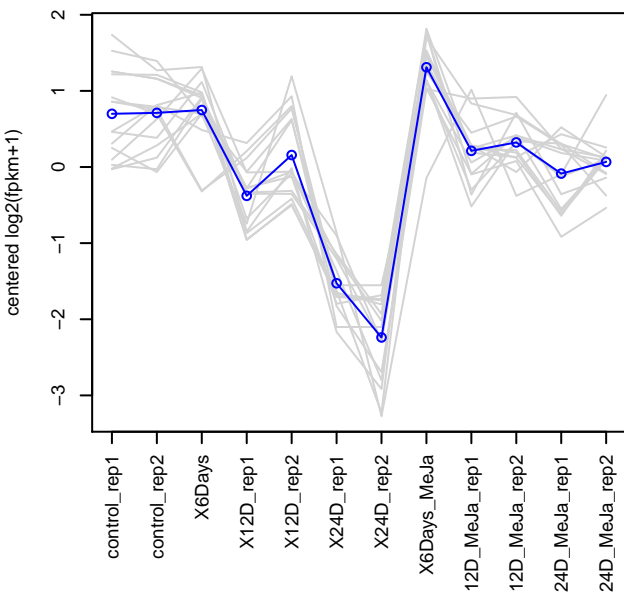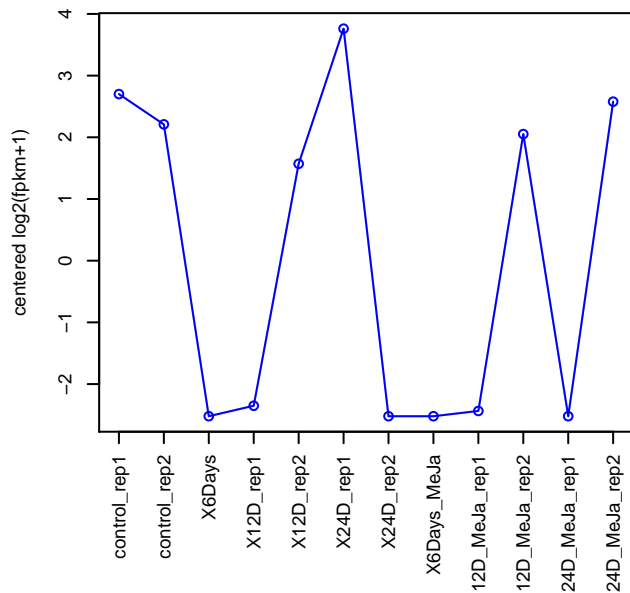

subcluster\_238\_log2\_medianCentered\_fpkm.matrix, 7 tra subcluster\_239\_log2\_medianCentered\_fpkm.matrix, 5 tra

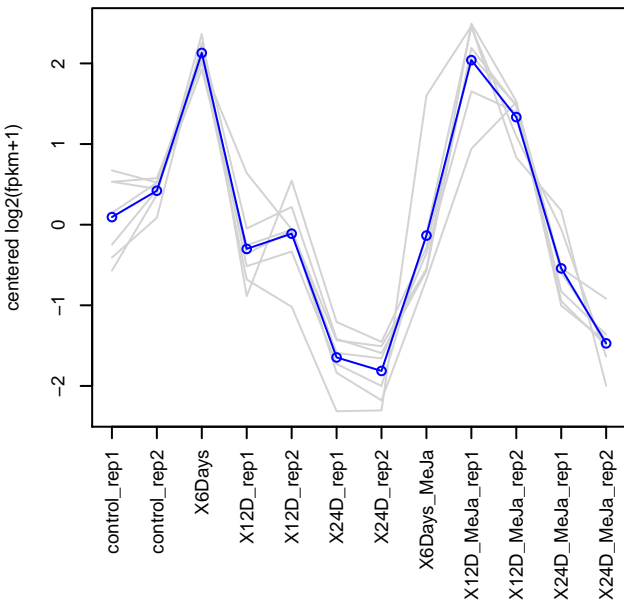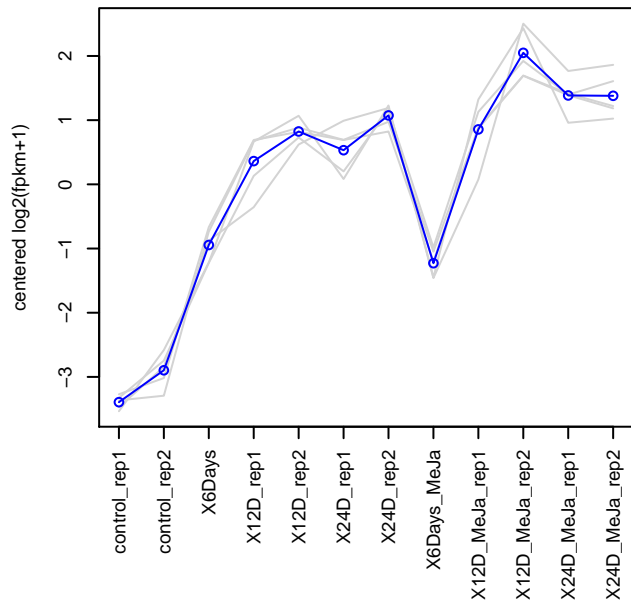

subcluster\_23\_log2\_medianCentered\_fpkm.matrix, 4 tra subcluster\_240\_log2\_medianCentered\_fpkm.matrix, 3 tra

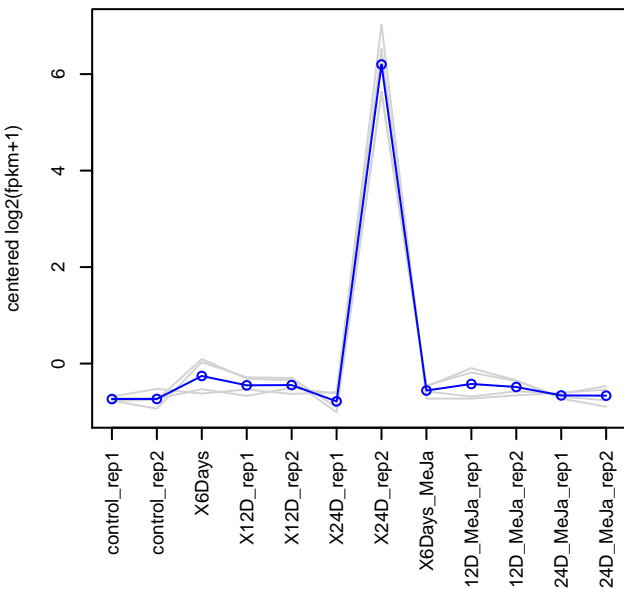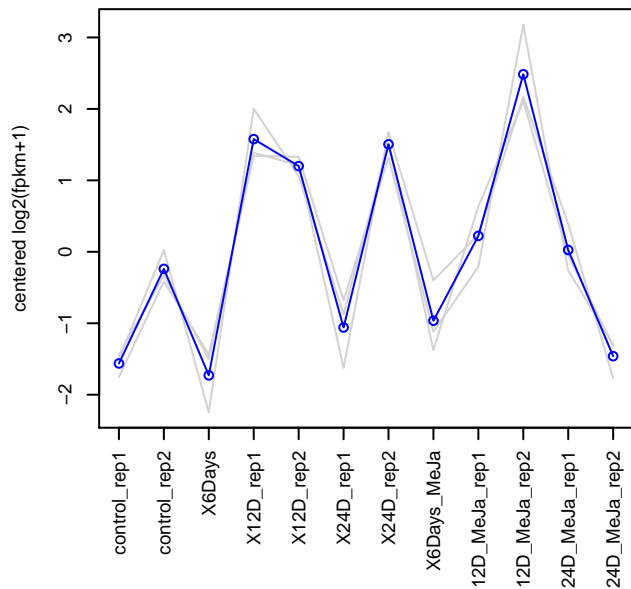

subcluster\_241\_log2\_medianCentered\_fpkm.matrix, 4 tra subcluster\_242\_log2\_medianCentered\_fpkm.matrix, 9 tra

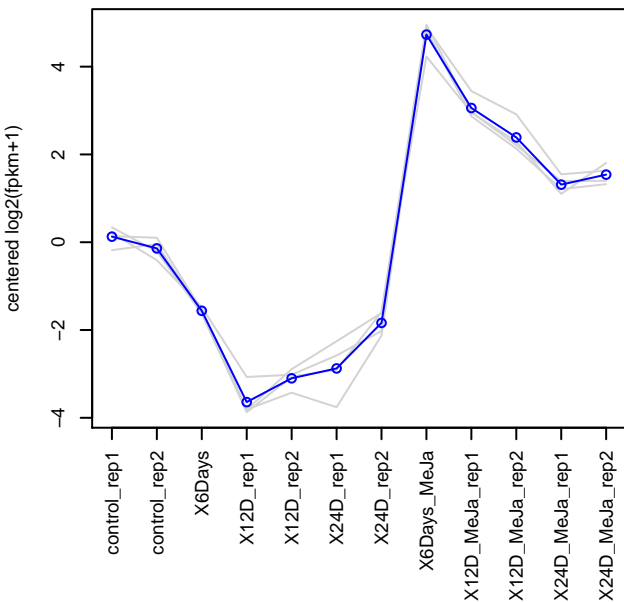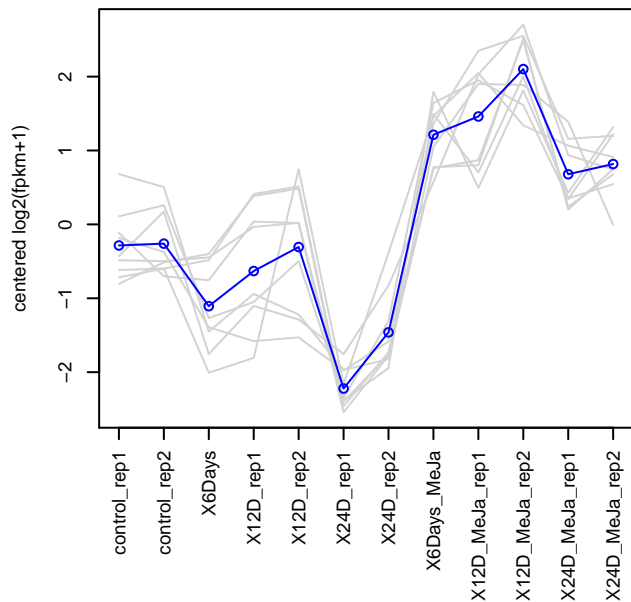

subcluster\_243\_log2\_medianCentered\_fpkm.matrix, 4 tra subcluster\_244\_log2\_medianCentered\_fpkm.matrix, 4 tra

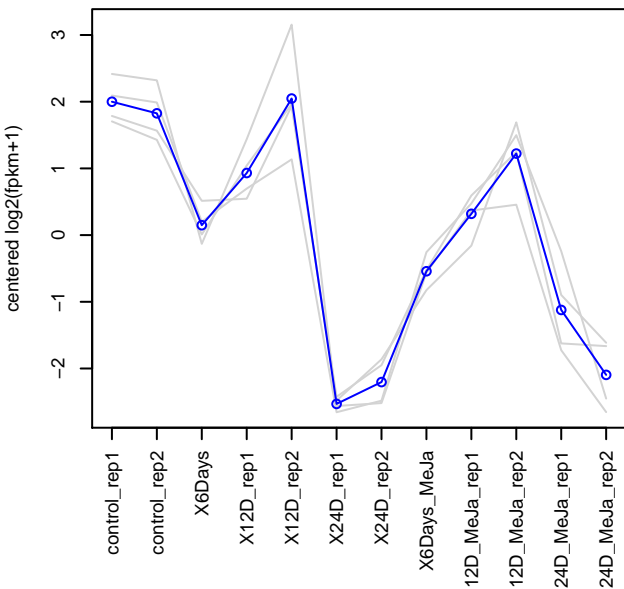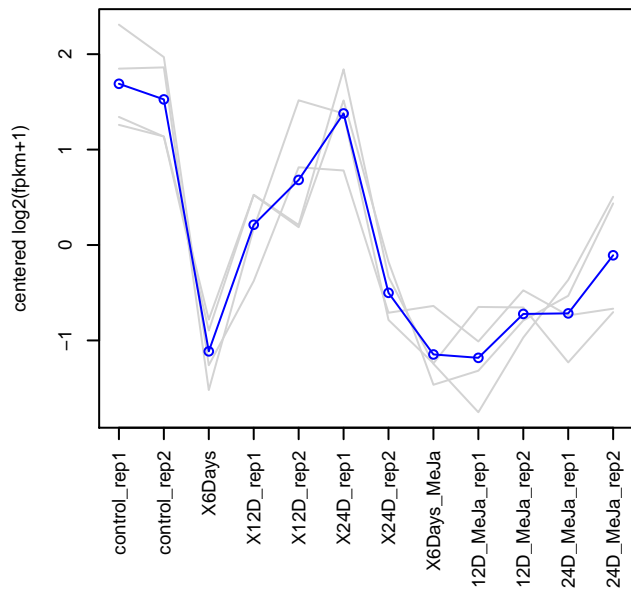



subcluster\_245\_log2\_medianCentered\_fpkm.matrix, 4 tra subcluster\_246\_log2\_medianCentered\_fpkm.matrix, 4 tra

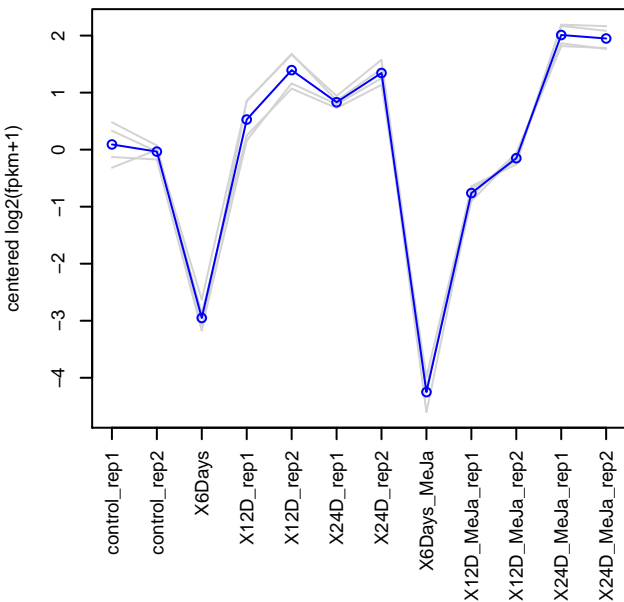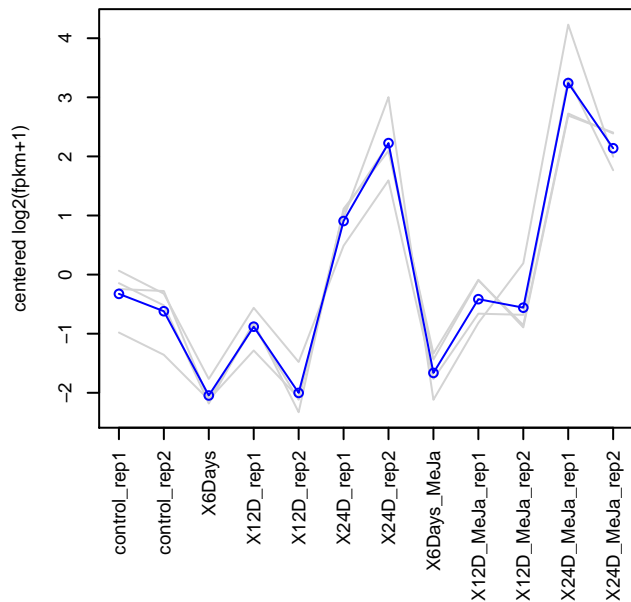

subcluster\_247\_log2\_medianCentered\_fpkm.matrix, 4 tra subcluster\_248\_log2\_medianCentered\_fpkm.matrix, 4 tra

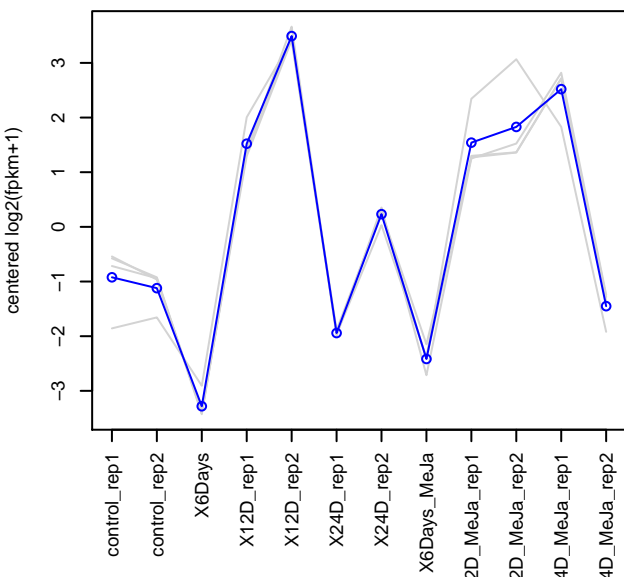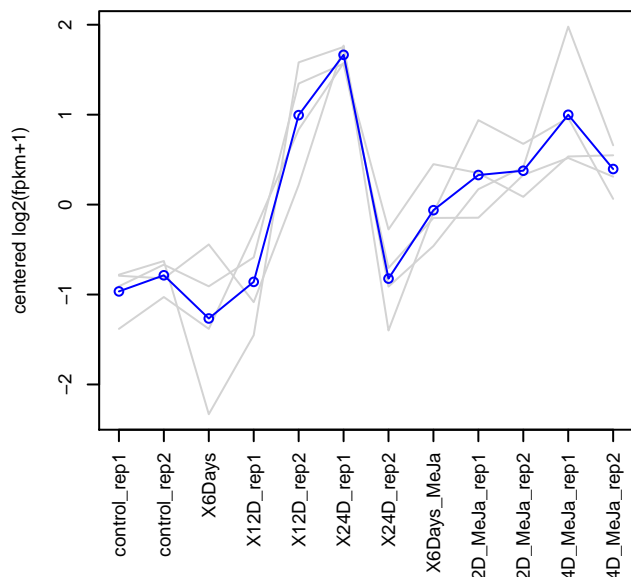

subcluster\_249\_log2\_medianCentered\_fpkm.matrix, 8 tra

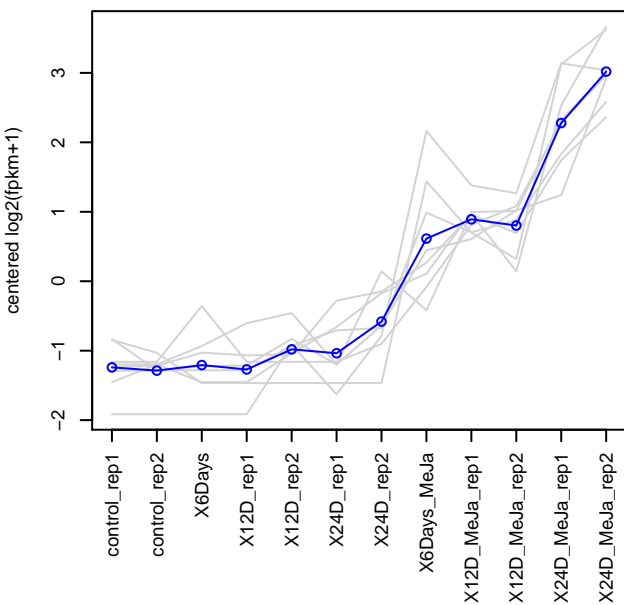

subcluster\_24\_log2\_medianCentered\_fpkm.matrix, 145 tra

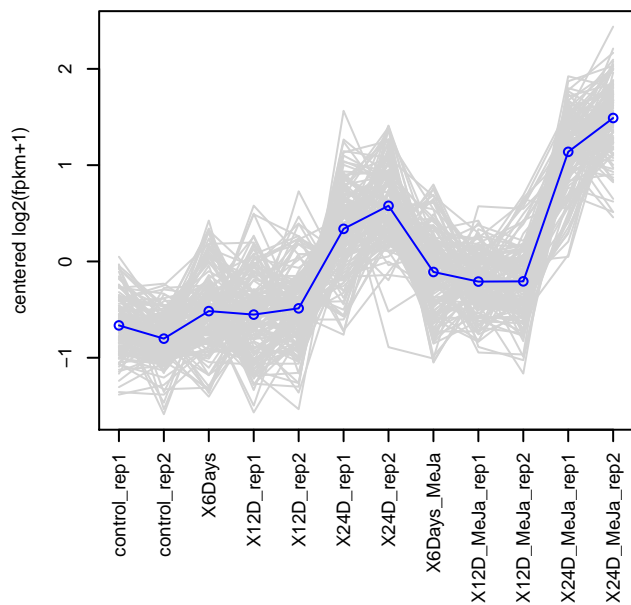

subcluster\_250\_log2\_medianCentered\_fpkm.matrix, 11 tra

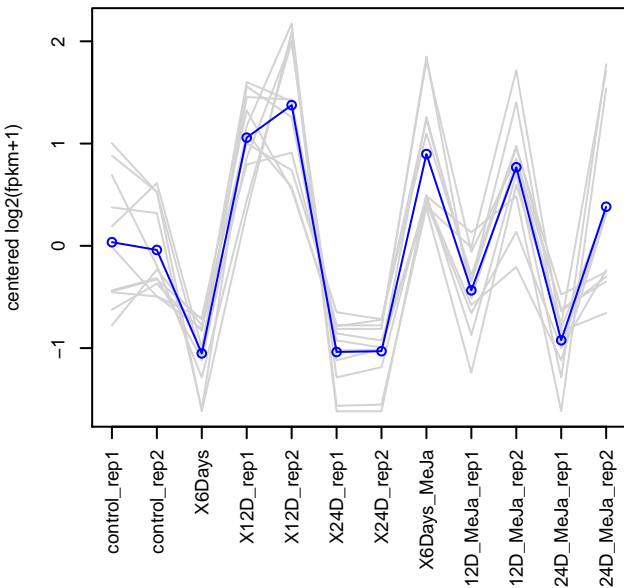

subcluster\_251\_log2\_medianCentered\_fpkm.matrix, 2 tra

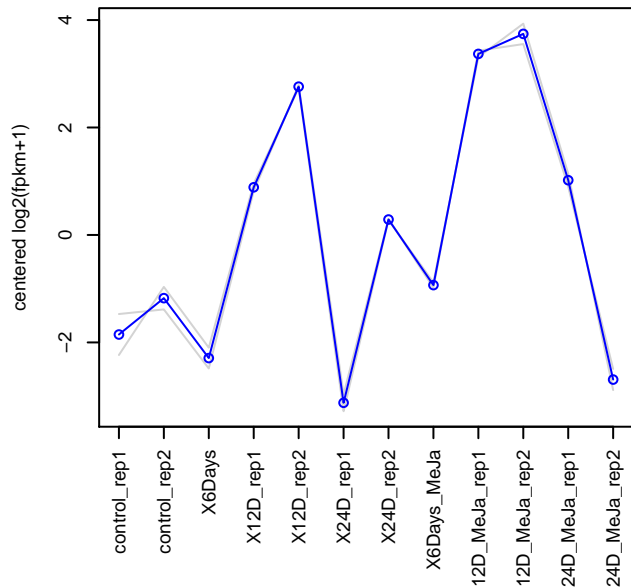

subcluster\_252\_log2\_medianCentered\_fpkm.matrix, 2 tra subcluster\_253\_log2\_medianCentered\_fpkm.matrix, 5 tra

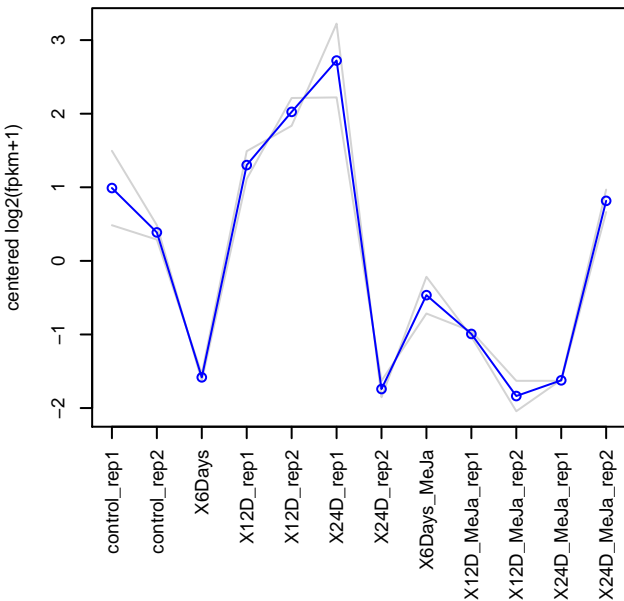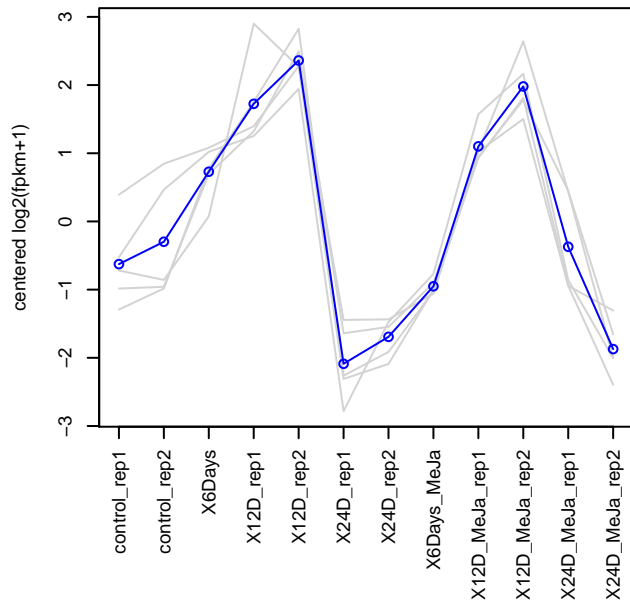

subcluster\_254\_log2\_medianCentered\_fpkm.matrix, 5 tra subcluster\_255\_log2\_medianCentered\_fpkm.matrix, 6 tra

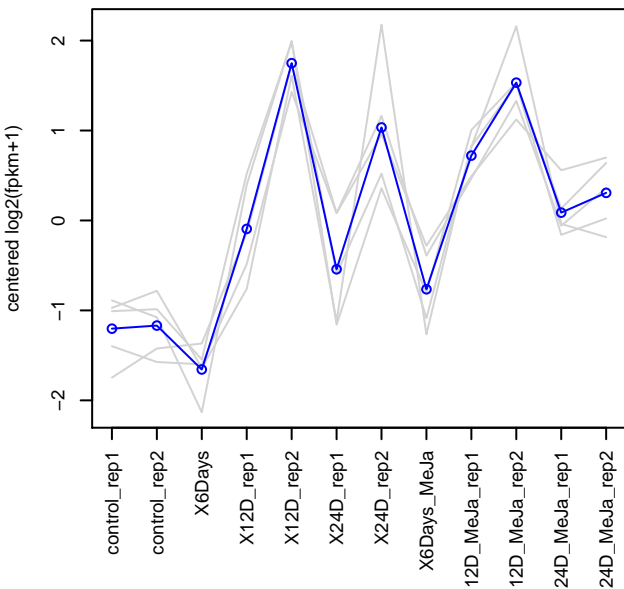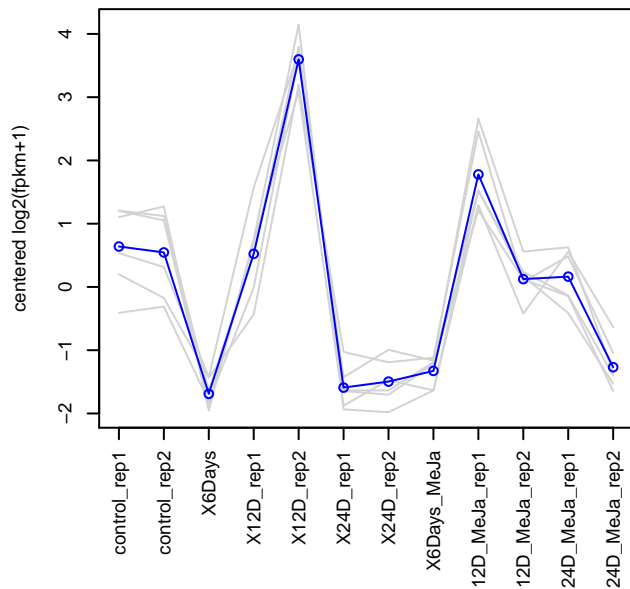

subcluster\_256\_log2\_medianCentered\_fpkm.matrix, 3 tra subcluster\_257\_log2\_medianCentered\_fpkm.matrix, 8 tra

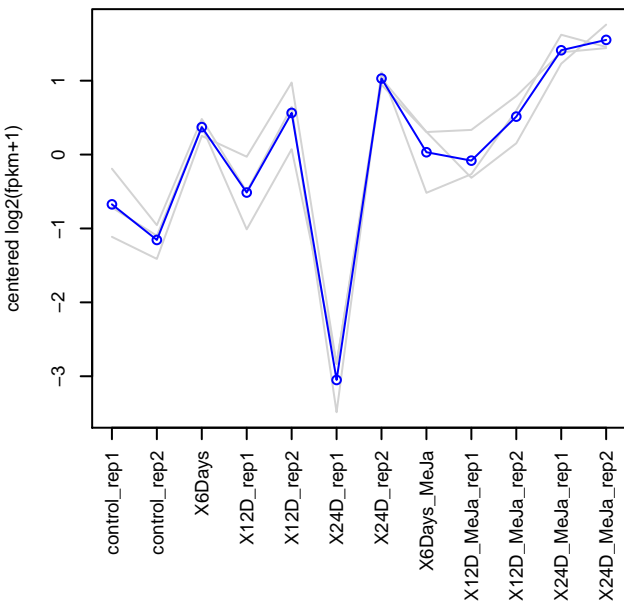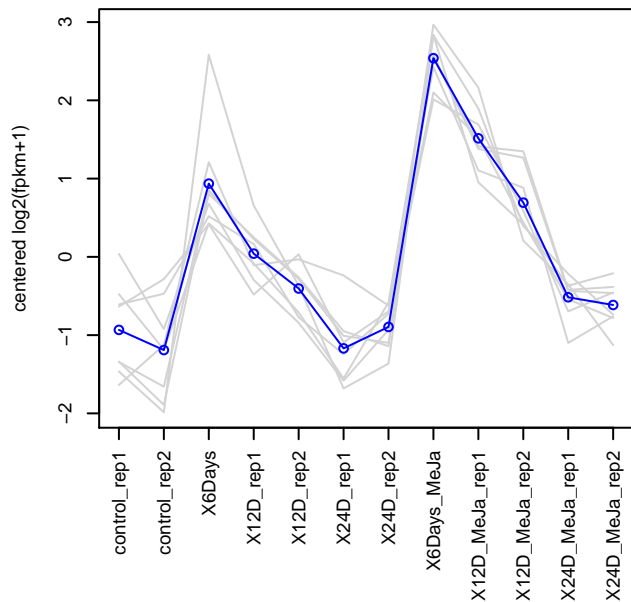

subcluster\_258\_log2\_medianCentered\_fpkm.matrix, 6 tra subcluster\_259\_log2\_medianCentered\_fpkm.matrix, 3 tra

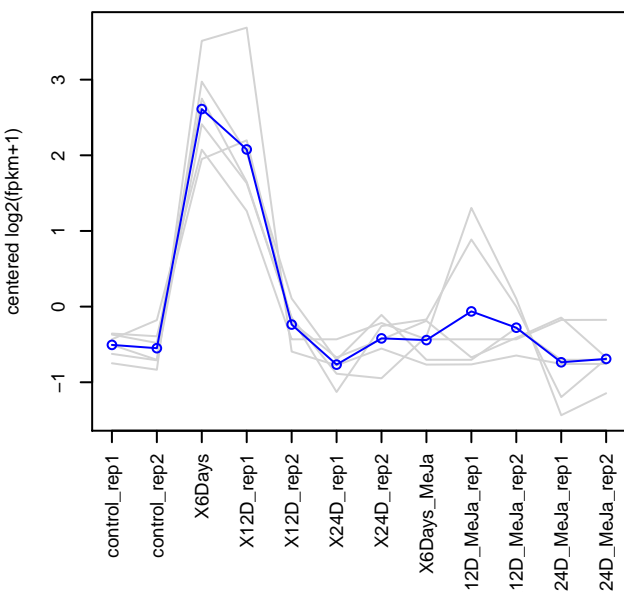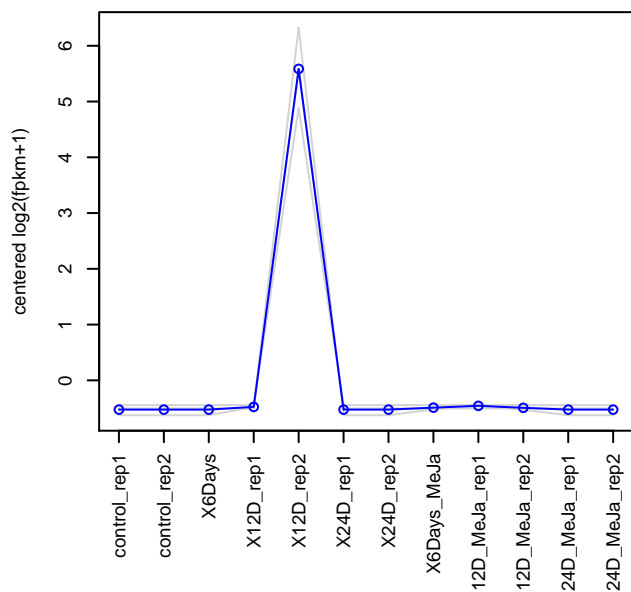

subcluster\_25\_log2\_medianCentered\_fpkm.matrix, 42 tra subcluster\_260\_log2\_medianCentered\_fpkm.matrix, 2 tra

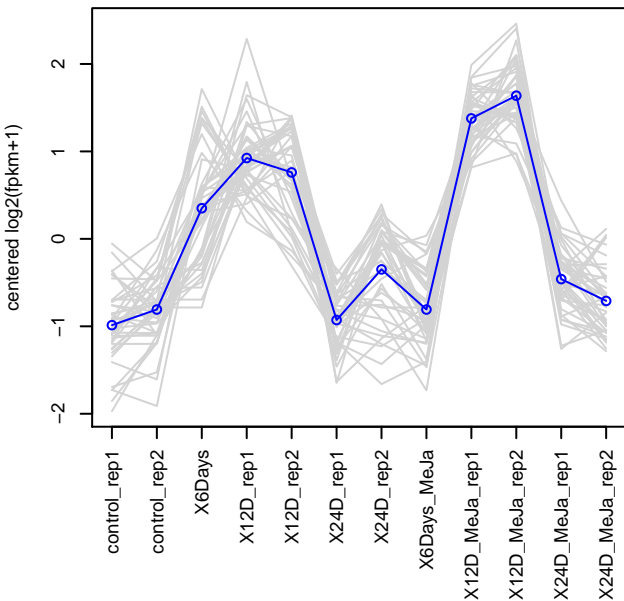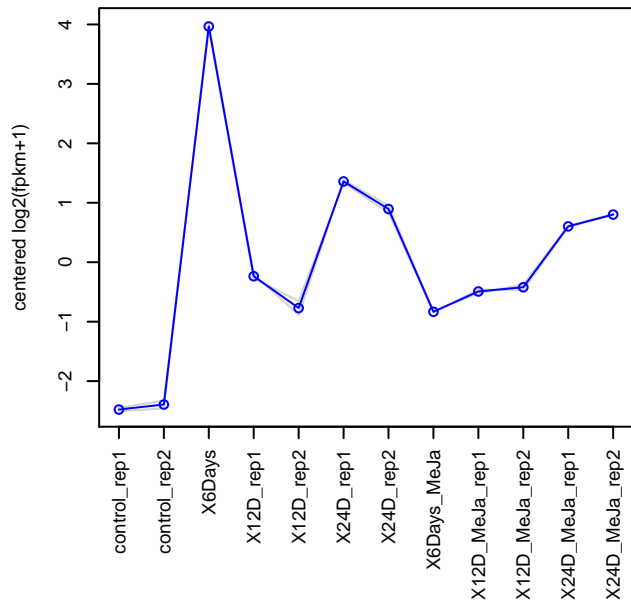

subcluster\_261\_log2\_medianCentered\_fpkm.matrix, 1 tra subcluster\_262\_log2\_medianCentered\_fpkm.matrix, 2 tra

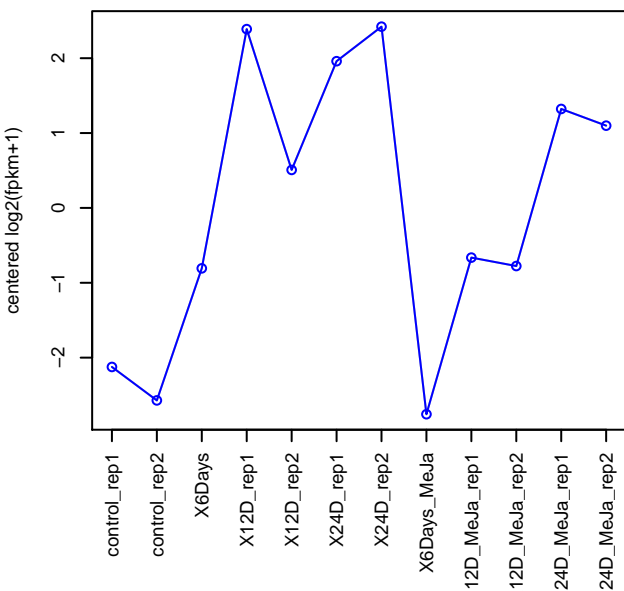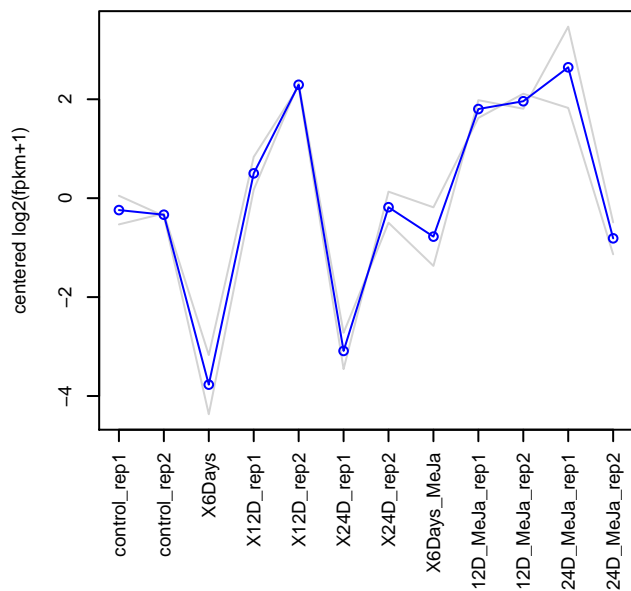

subcluster\_263\_log2\_medianCentered\_fpkm.matrix, 2 tra subcluster\_264\_log2\_medianCentered\_fpkm.matrix, 1 tra

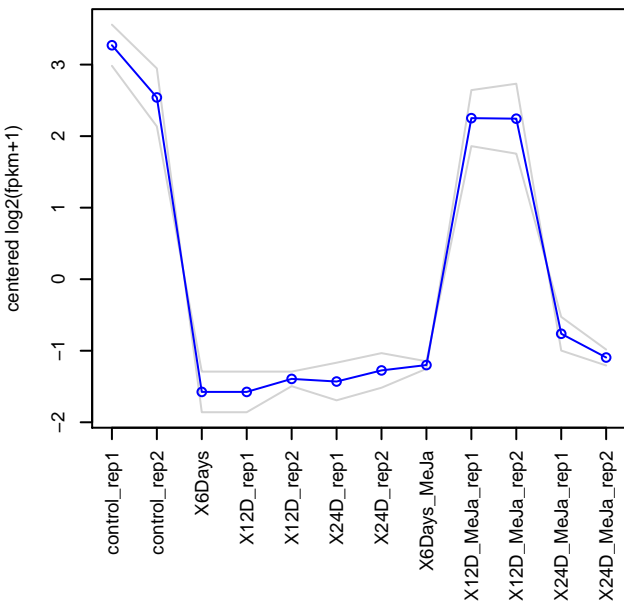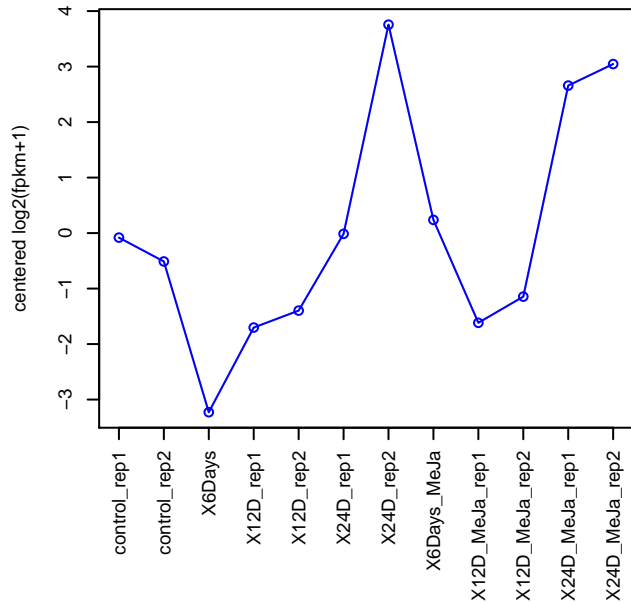

subcluster\_265\_log2\_medianCentered\_fpkm.matrix, 1 tra subcluster\_266\_log2\_medianCentered\_fpkm.matrix, 2 tra

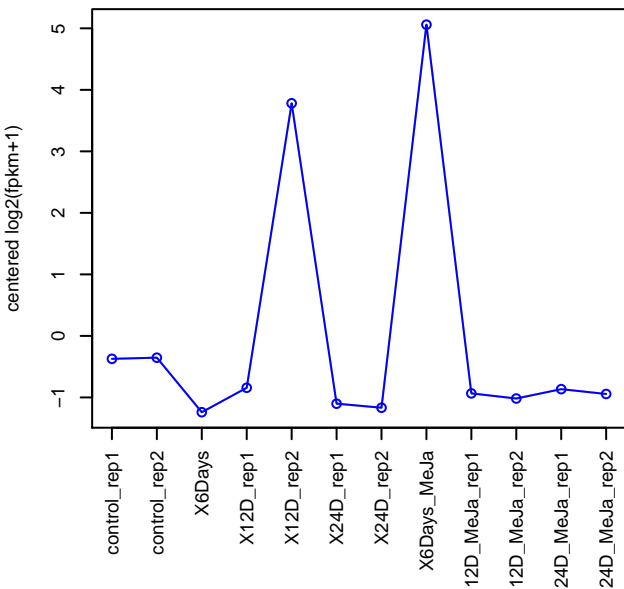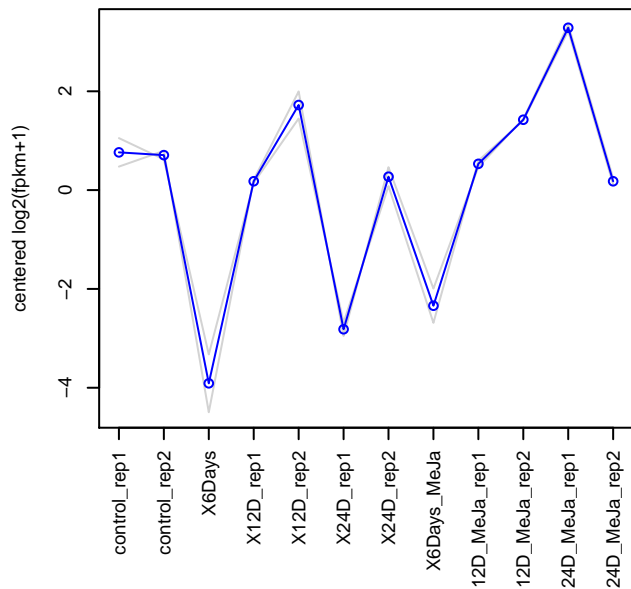

subcluster\_267\_log2\_medianCentered\_fpkm.matrix, 2 tra subcluster\_268\_log2\_medianCentered\_fpkm.matrix, 3 tra

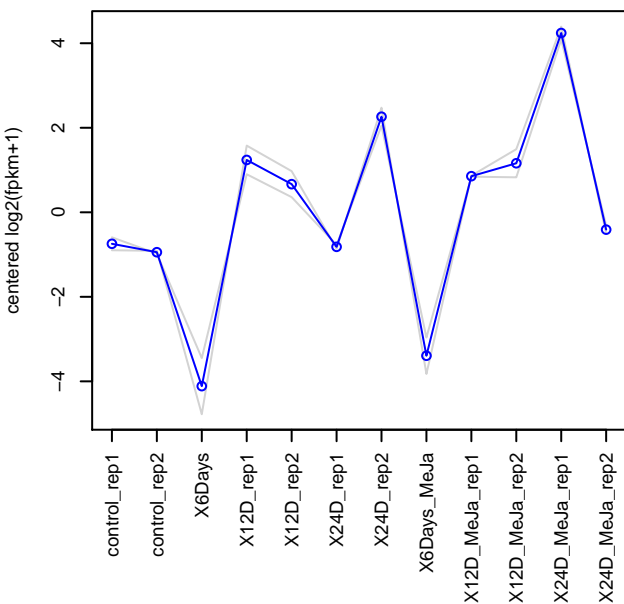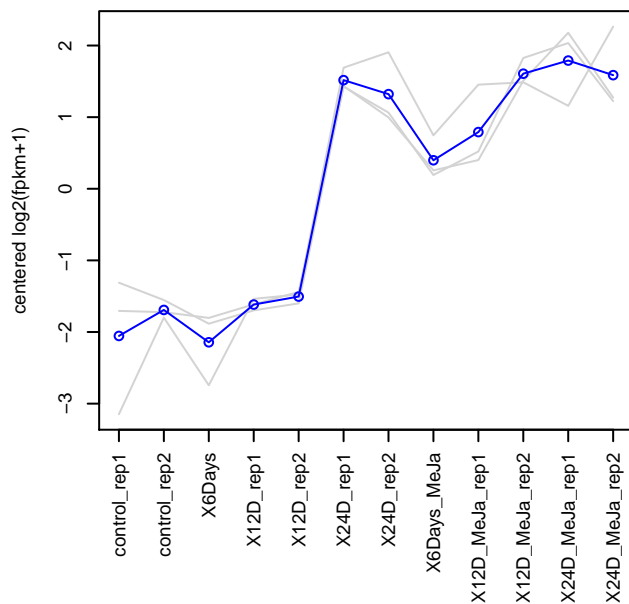

subcluster\_269\_log2\_medianCentered\_fpkm.matrix, 1 tra subcluster\_26\_log2\_medianCentered\_fpkm.matrix, 28 tra

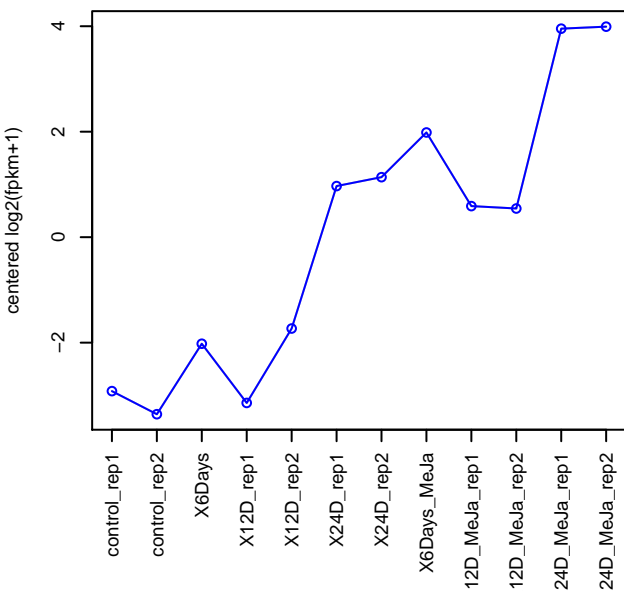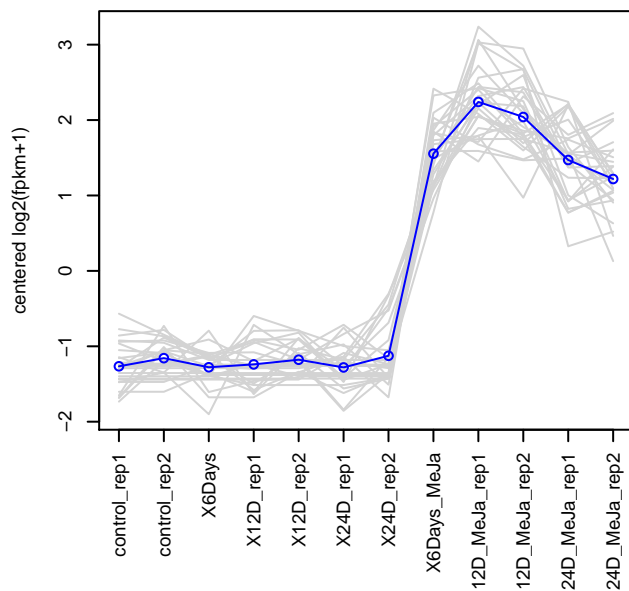

subcluster\_270\_log2\_medianCentered\_fpkm.matrix, 3 tra subcluster\_271\_log2\_medianCentered\_fpkm.matrix, 1 tra

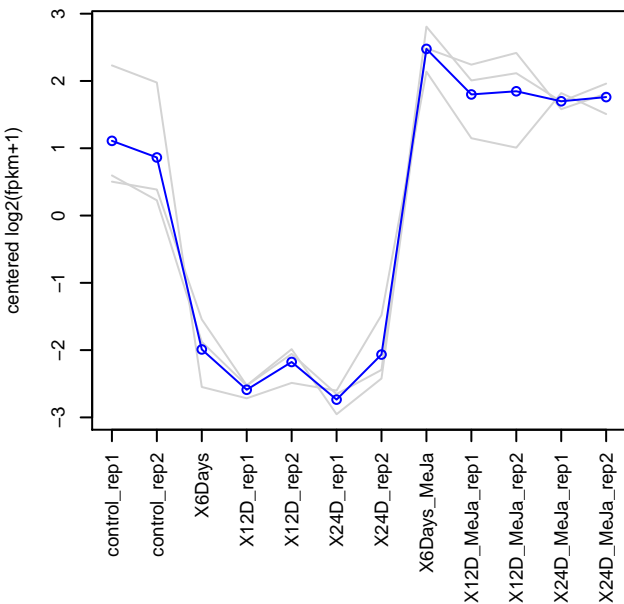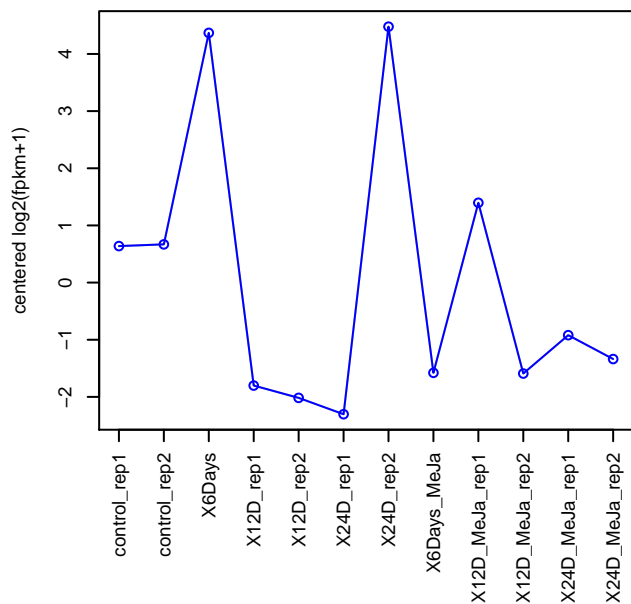

subcluster\_272\_log2\_medianCentered\_fpkm.matrix, 9 tra subcluster\_273\_log2\_medianCentered\_fpkm.matrix, 3 tra

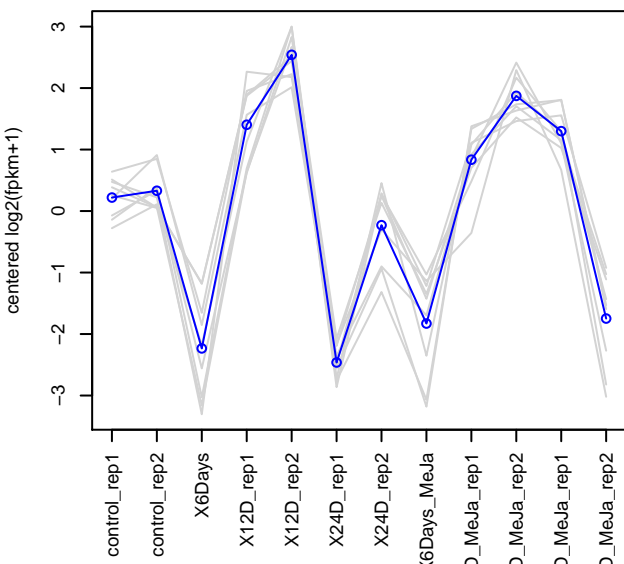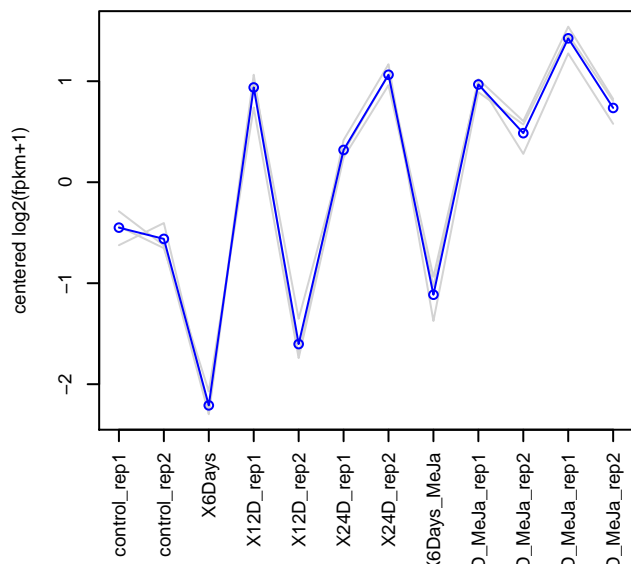



subcluster\_274\_log2\_medianCentered\_fpkm.matrix, 2 tra subcluster\_275\_log2\_medianCentered\_fpkm.matrix, 1 tra

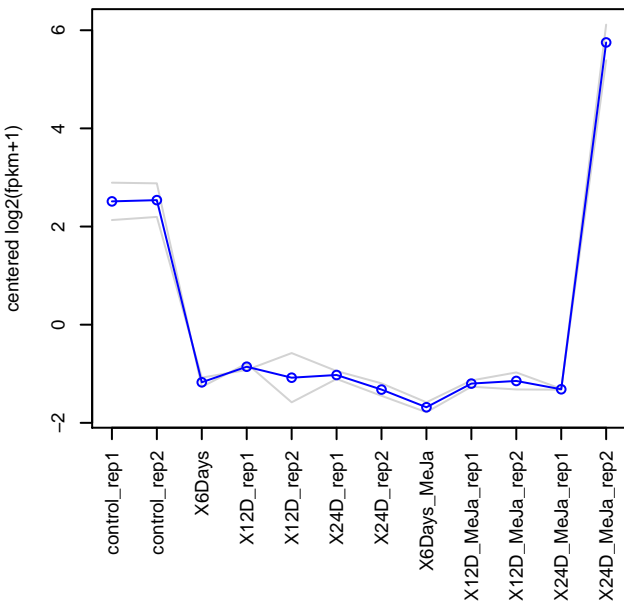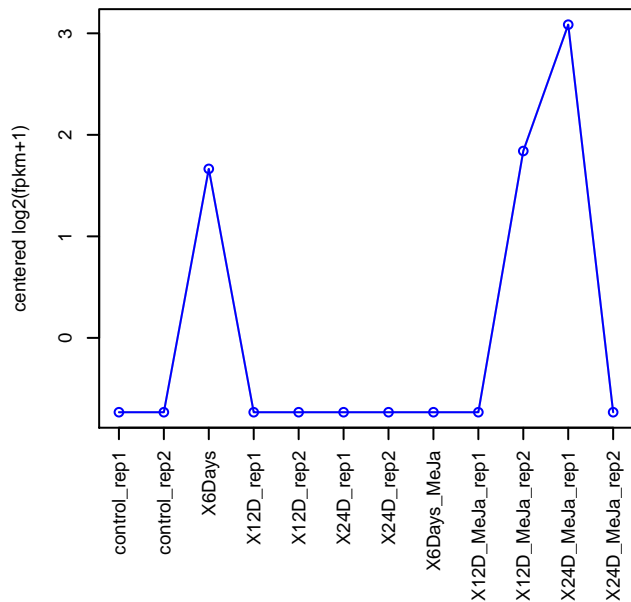

subcluster\_276\_log2\_medianCentered\_fpkm.matrix, 4 tra subcluster\_277\_log2\_medianCentered\_fpkm.matrix, 5 tra

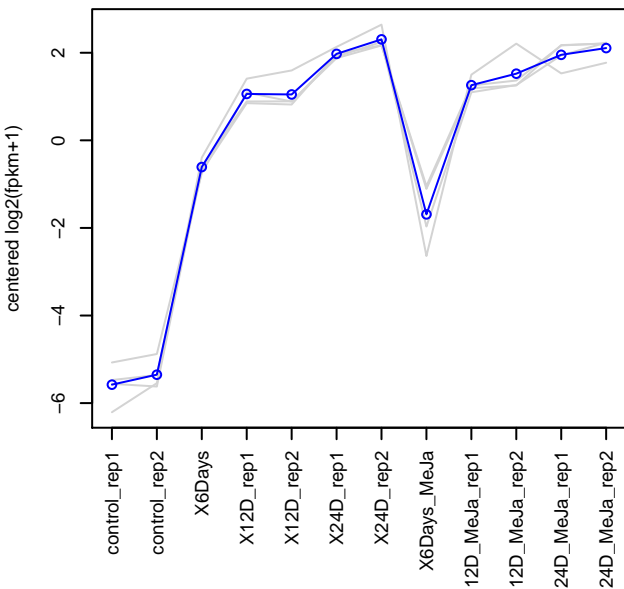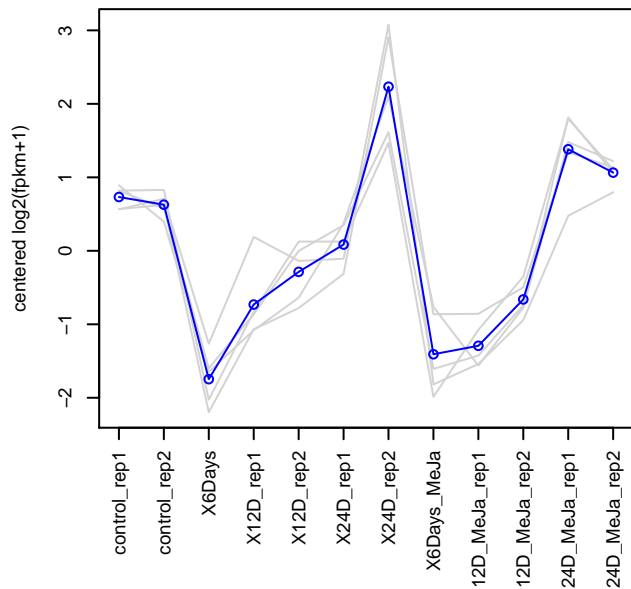

subcluster\_278\_log2\_medianCentered\_fpkm.matrix, 11 trs

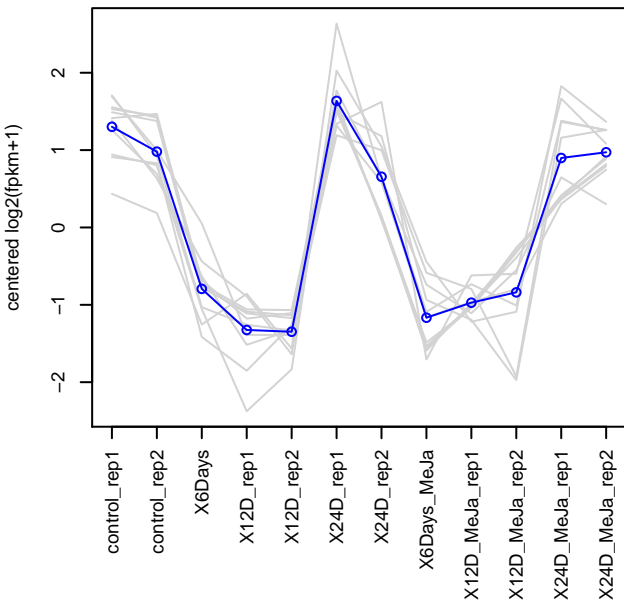

subcluster\_279\_log2\_medianCentered\_fpkm.matrix, 2 trs

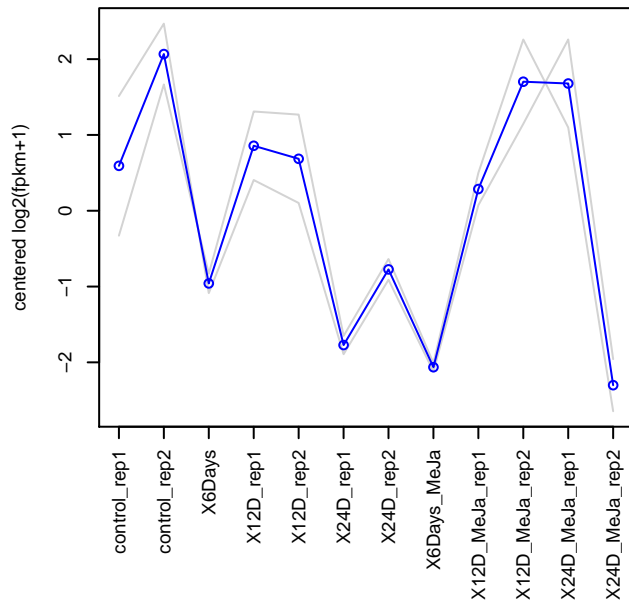

subcluster\_27\_log2\_medianCentered\_fpkm.matrix, 253 trs

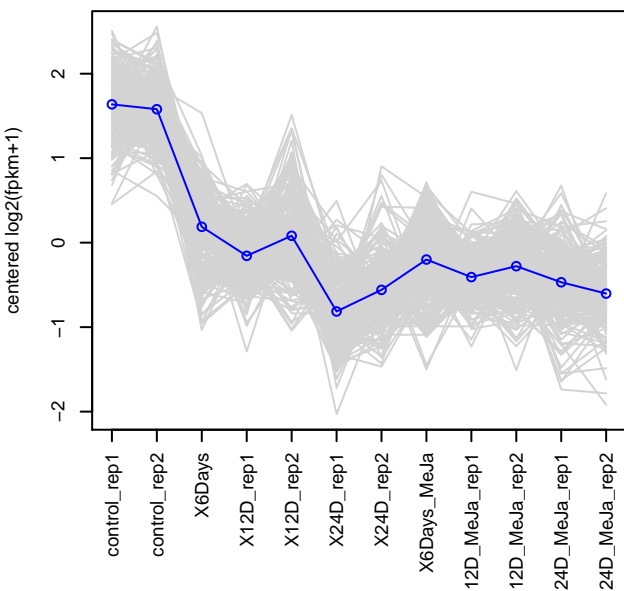

subcluster\_280\_log2\_medianCentered\_fpkm.matrix, 7 trs

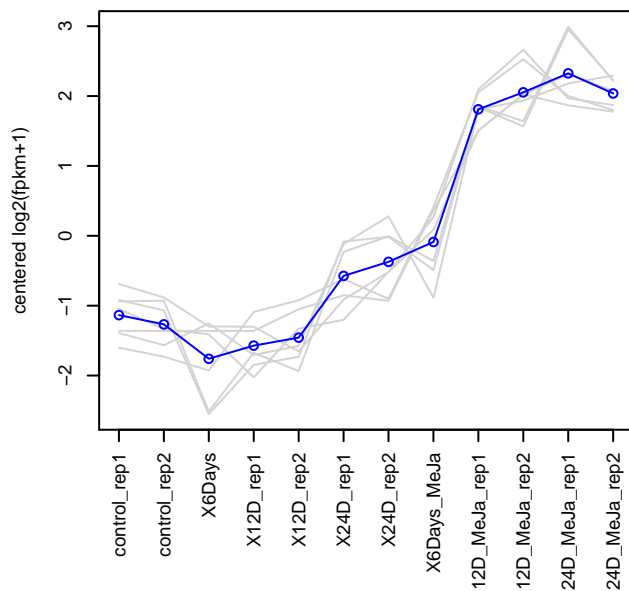

subcluster\_281\_log2\_medianCentered\_fpkm.matrix, 1 tra subcluster\_282\_log2\_medianCentered\_fpkm.matrix, 3 tra

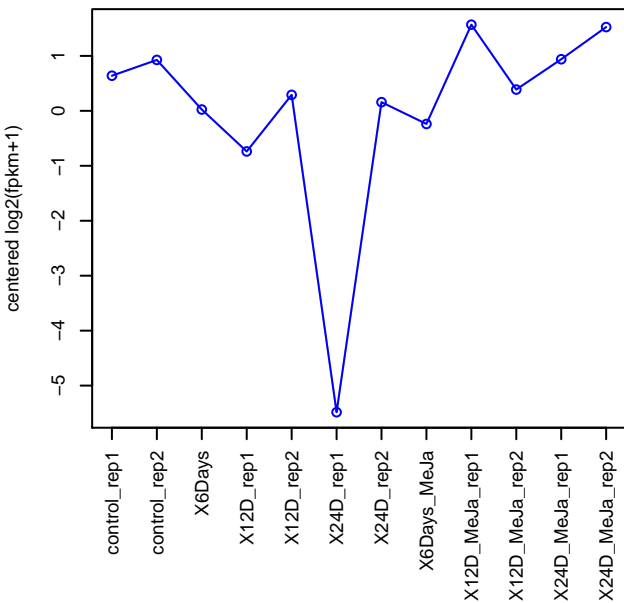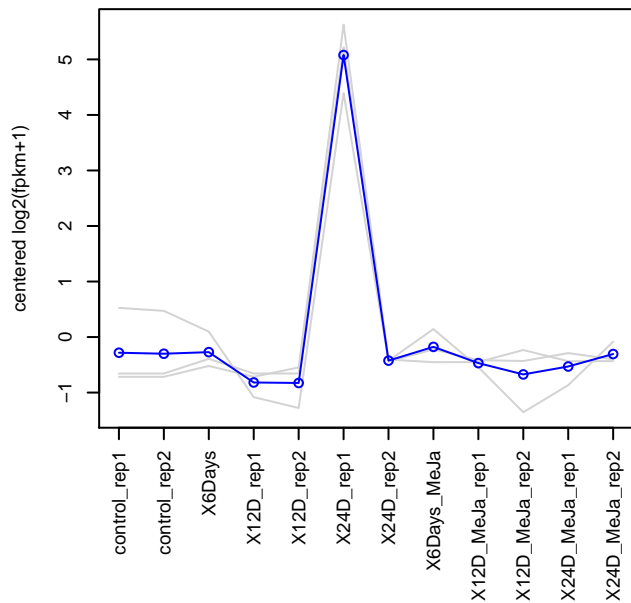

subcluster\_283\_log2\_medianCentered\_fpkm.matrix, 4 tra subcluster\_284\_log2\_medianCentered\_fpkm.matrix, 4 tra

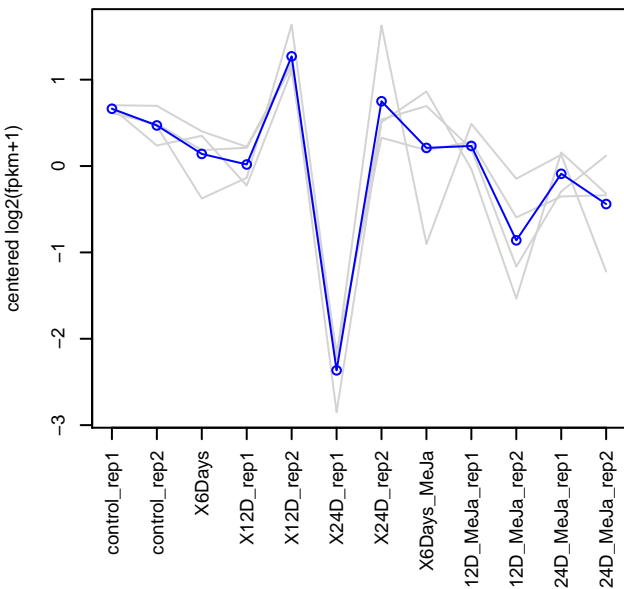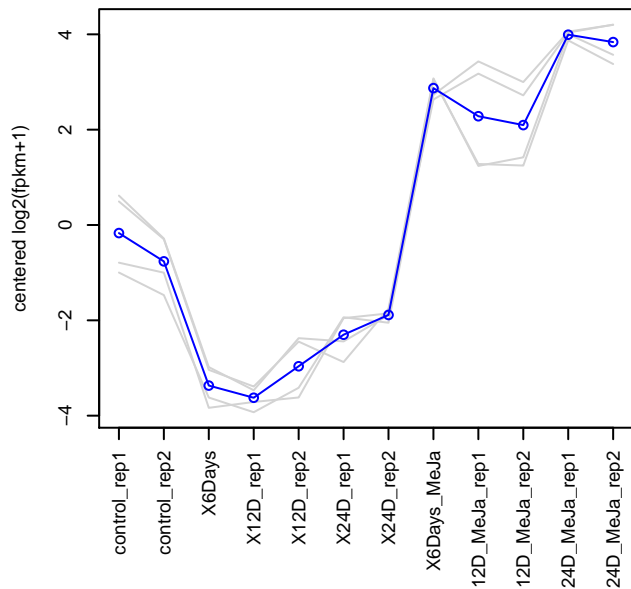

subcluster\_285\_log2\_medianCentered\_fpkm.matrix, 1 tra

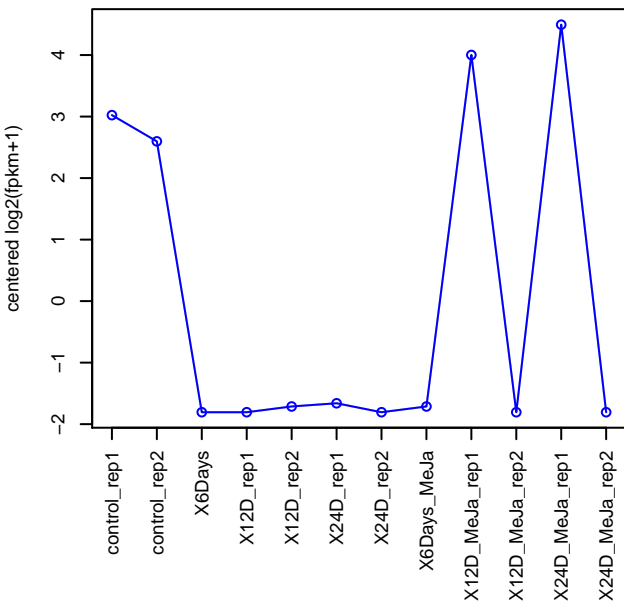

subcluster\_286\_log2\_medianCentered\_fpkm.matrix, 1 tra

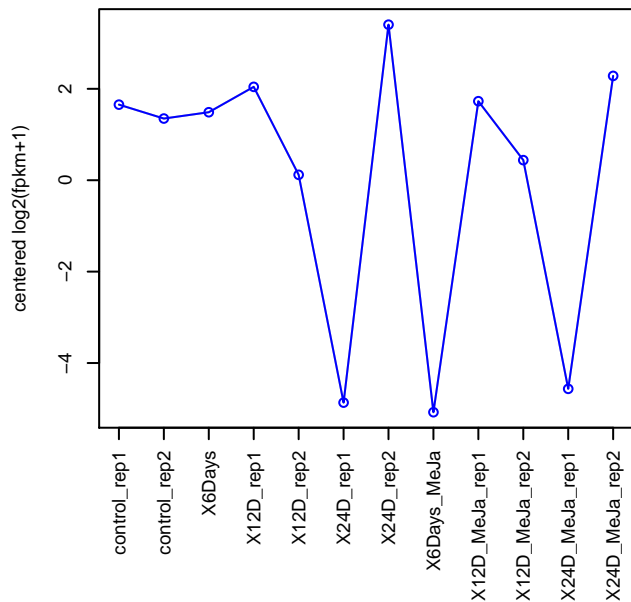

subcluster\_287\_log2\_medianCentered\_fpkm.matrix, 2 tra

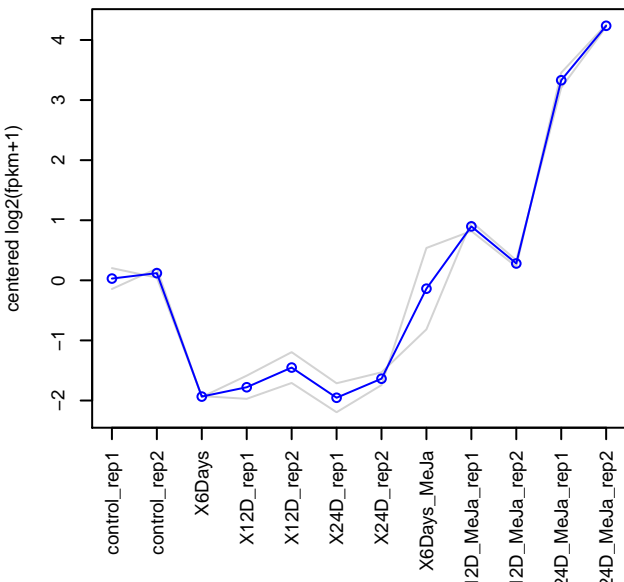

subcluster\_288\_log2\_medianCentered\_fpkm.matrix, 1 tra

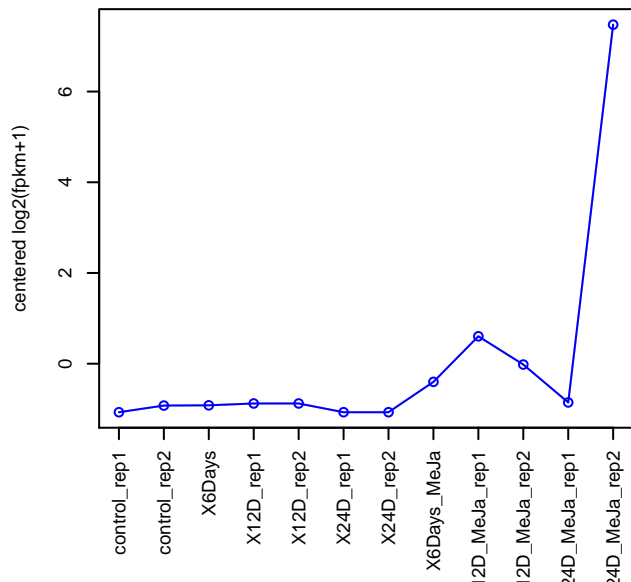

subcluster\_289\_log2\_medianCentered\_fpkm.matrix, 1 tra

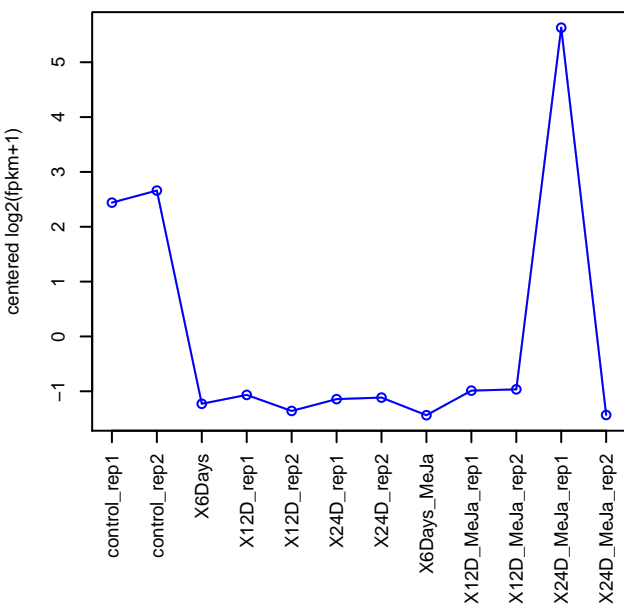

subcluster\_28\_log2\_medianCentered\_fpkm.matrix, 113 tra

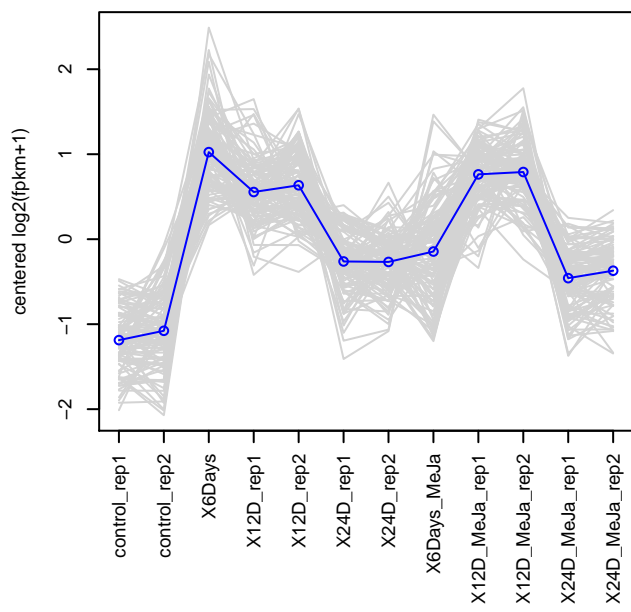

subcluster\_290\_log2\_medianCentered\_fpkm.matrix, 1 tra

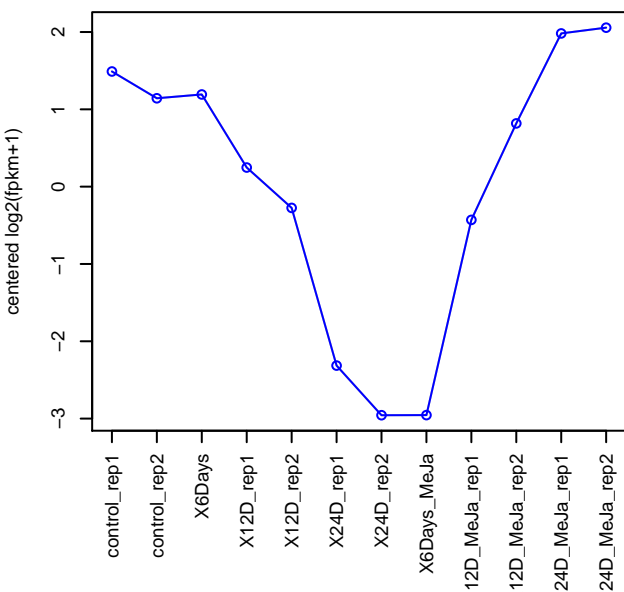

subcluster\_291\_log2\_medianCentered\_fpkm.matrix, 1 tra

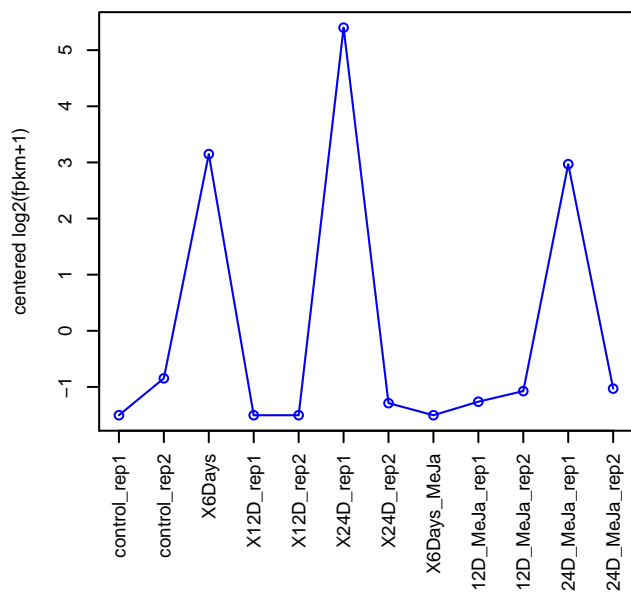

subcluster\_292\_log2\_medianCentered\_fpkm.matrix, 1 tra

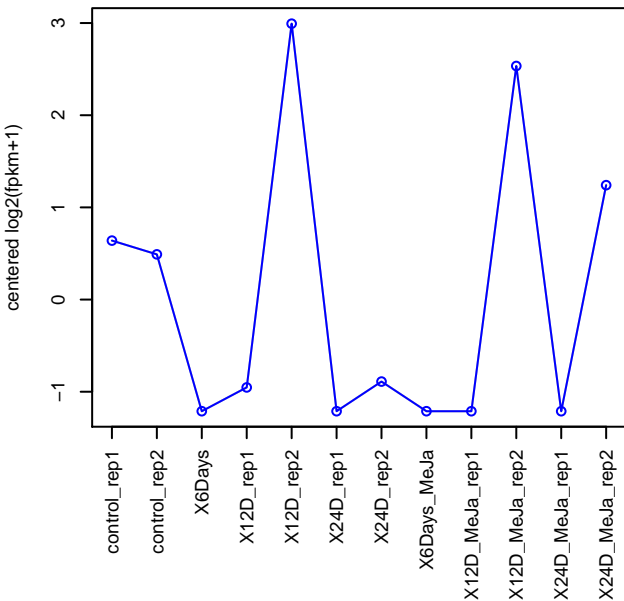

subcluster\_293\_log2\_medianCentered\_fpkm.matrix, 1 tra

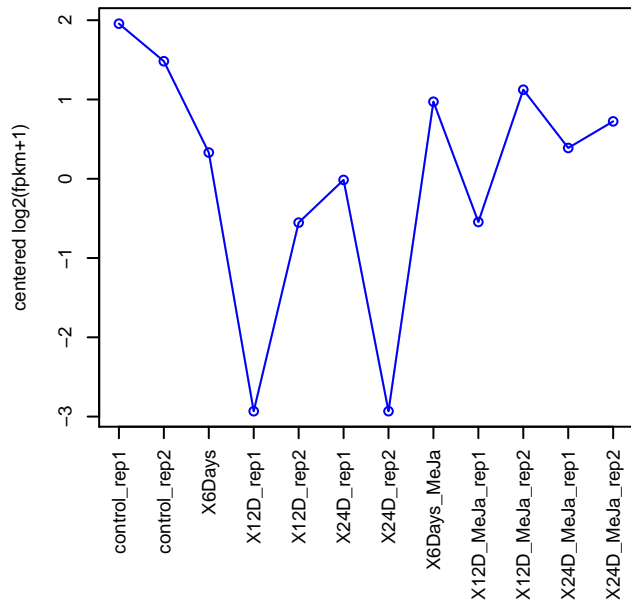

subcluster\_294\_log2\_medianCentered\_fpkm.matrix, 1 tra

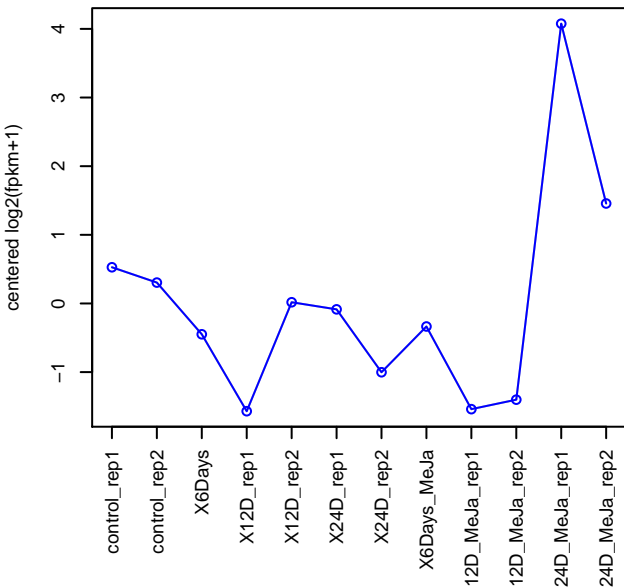

subcluster\_29\_log2\_medianCentered\_fpkm.matrix, 23 tra

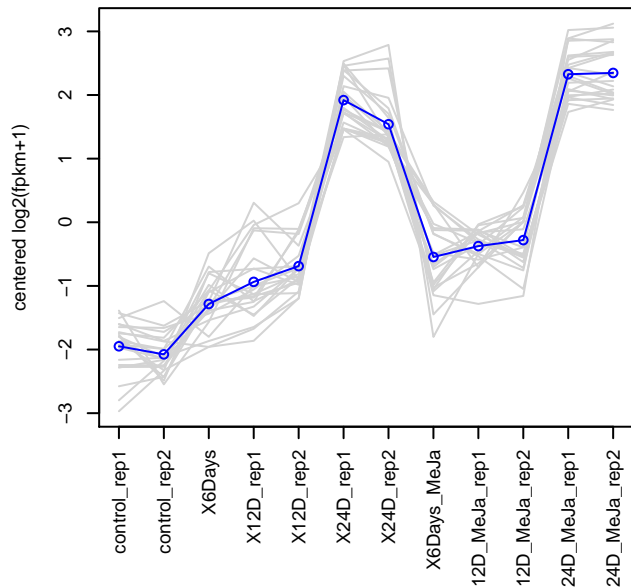

subcluster\_2\_log2\_medianCentered\_fpkm.matrix, 187 tra subcluster\_30\_log2\_medianCentered\_fpkm.matrix, 456 tra

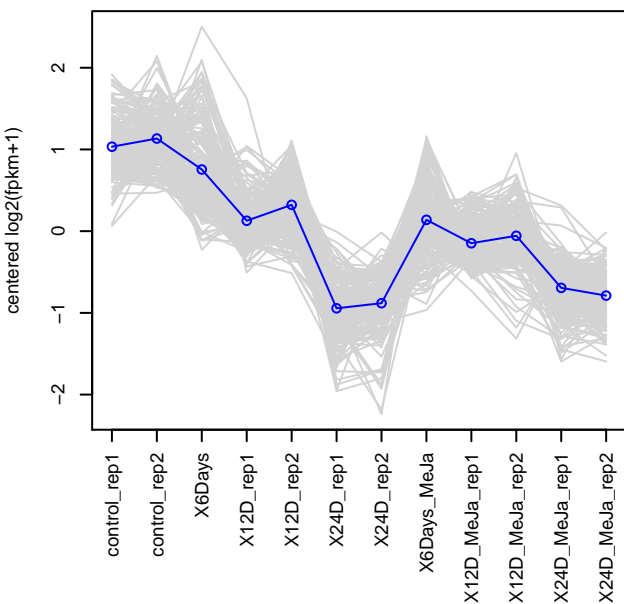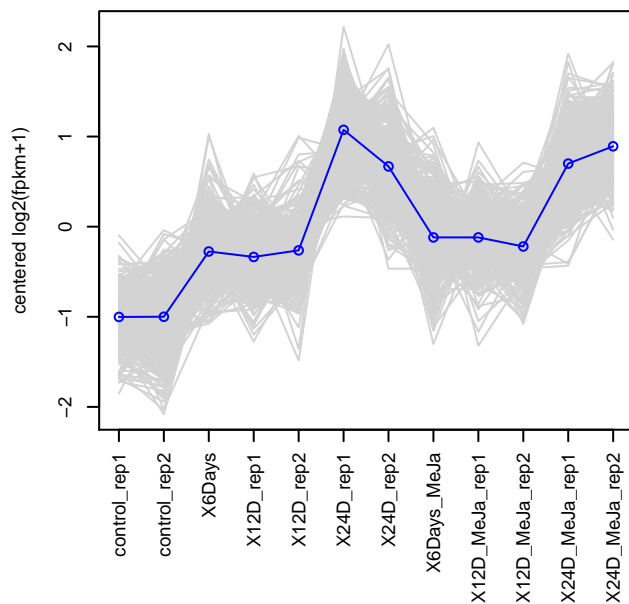

subcluster\_31\_log2\_medianCentered\_fpkm.matrix, 66 tra subcluster\_32\_log2\_medianCentered\_fpkm.matrix, 56 tra

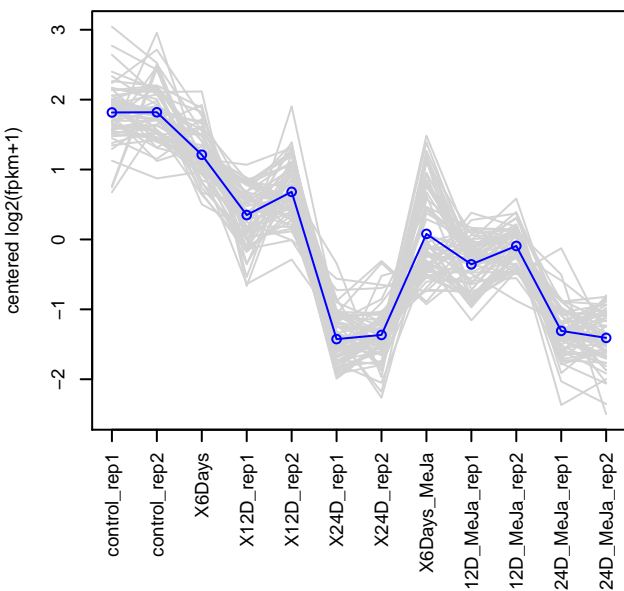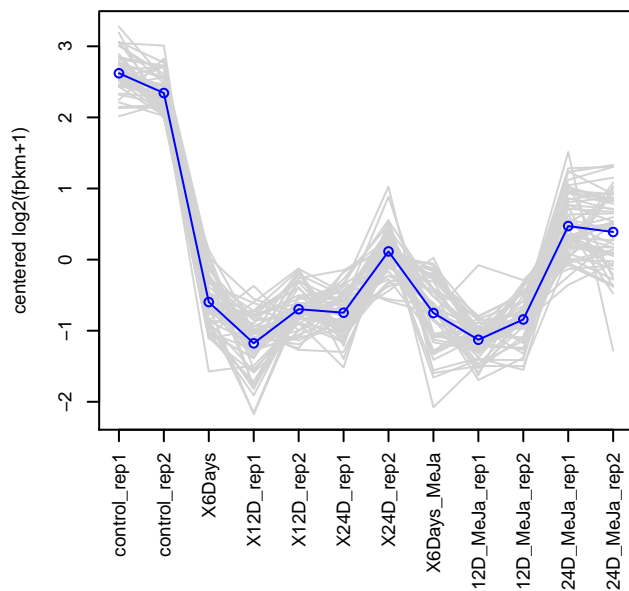

subcluster\_33\_log2\_medianCentered\_fpkm.matrix, 70 tra

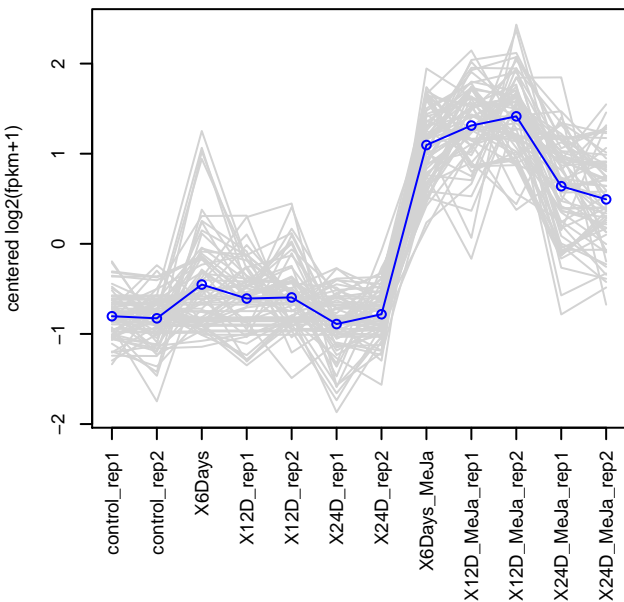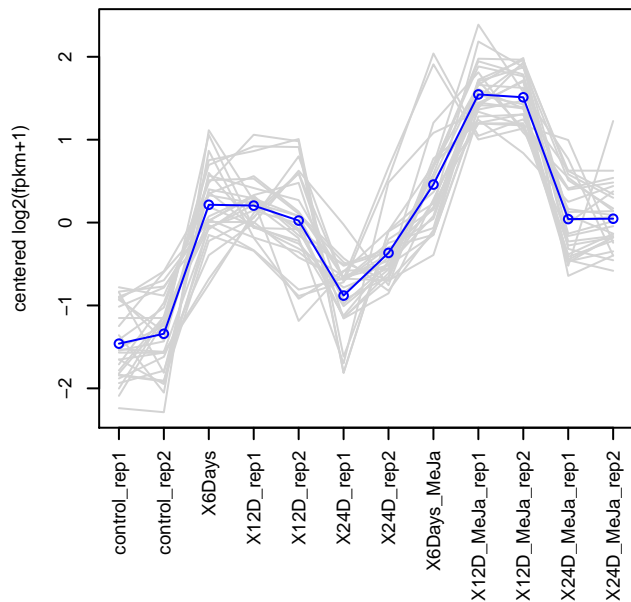

subcluster\_35\_log2\_medianCentered\_fpkm.matrix, 288 tra

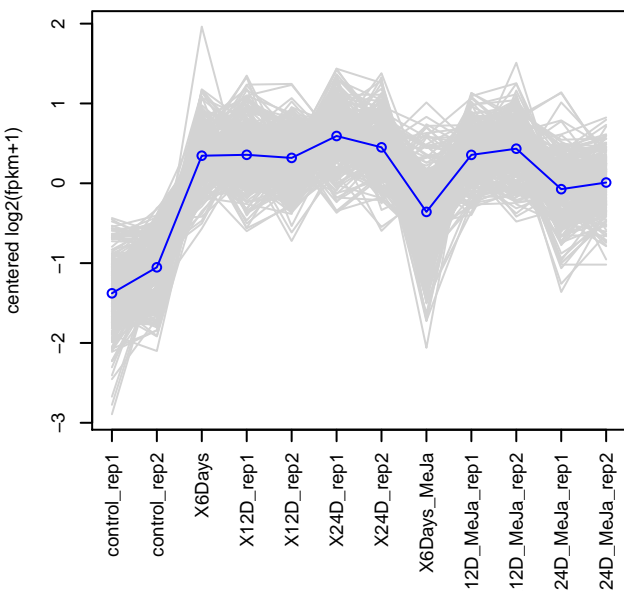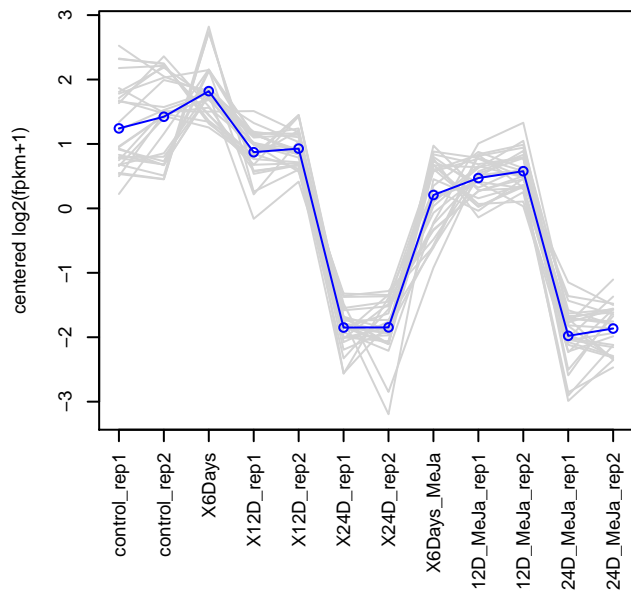



subcluster\_37\_log2\_medianCentered\_fpkm.matrix, 23 tra subcluster\_38\_log2\_medianCentered\_fpkm.matrix, 27 tra

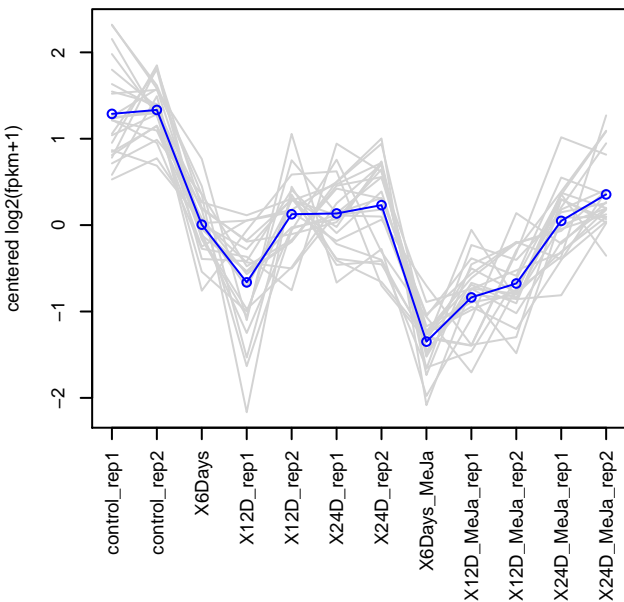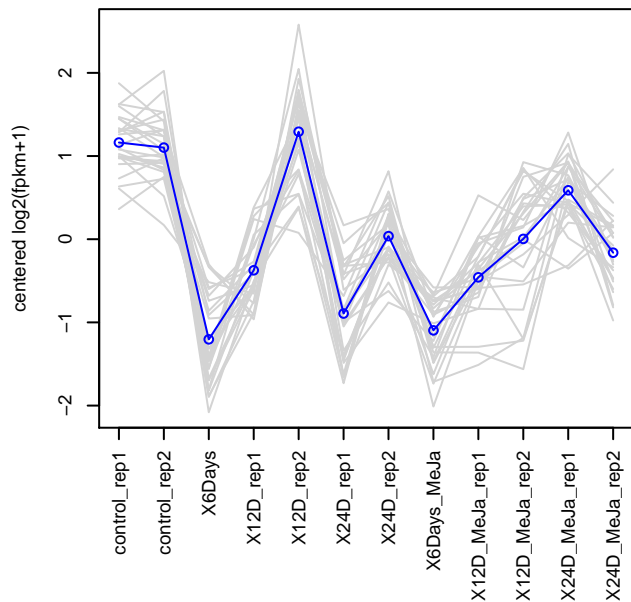

subcluster\_39\_log2\_medianCentered\_fpkm.matrix, 267 tra subcluster\_3\_log2\_medianCentered\_fpkm.matrix, 4 tra

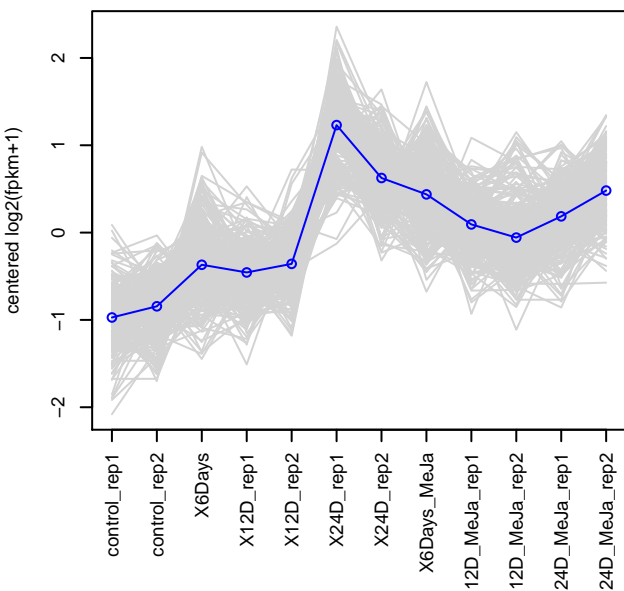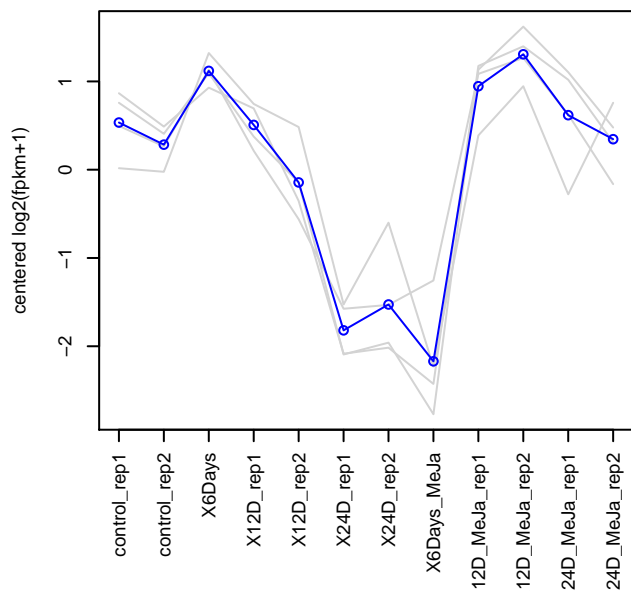

subcluster\_40\_log2\_medianCentered\_fpkm.matrix, 212 tr subcluster\_41\_log2\_medianCentered\_fpkm.matrix, 95 tr

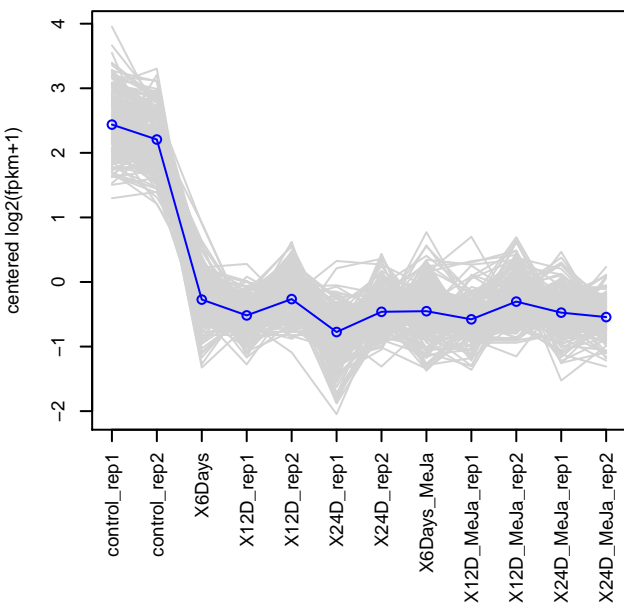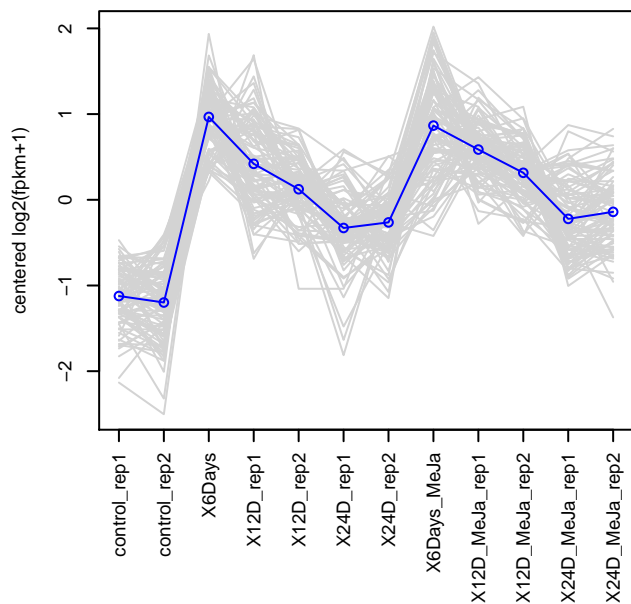

subcluster\_42\_log2\_medianCentered\_fpkm.matrix, 444 tr subcluster\_43\_log2\_medianCentered\_fpkm.matrix, 63 tr

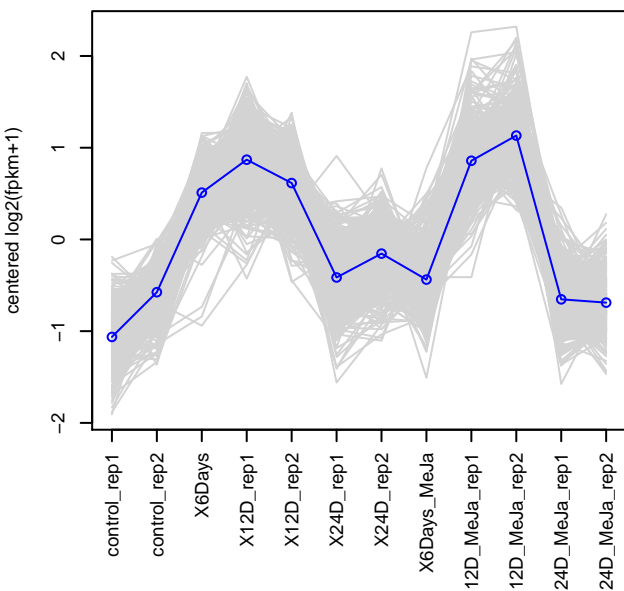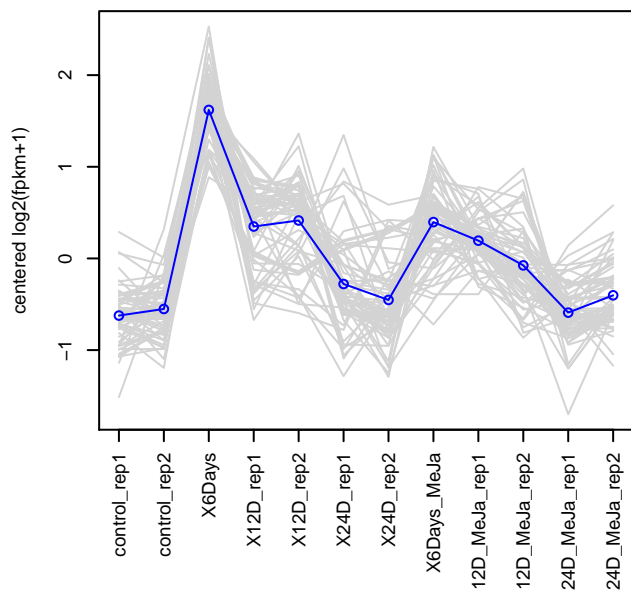

subcluster\_44\_log2\_medianCentered\_fpk.matrix, 1 tra

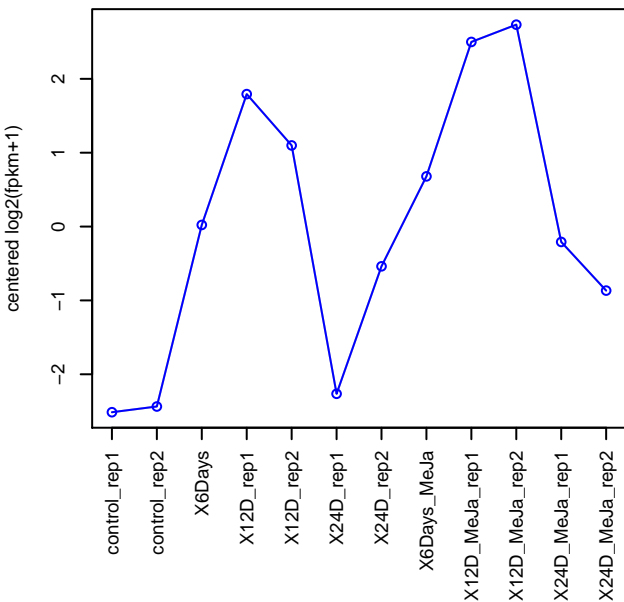

subcluster\_45\_log2\_medianCentered\_fpk.matrix, 142 tra

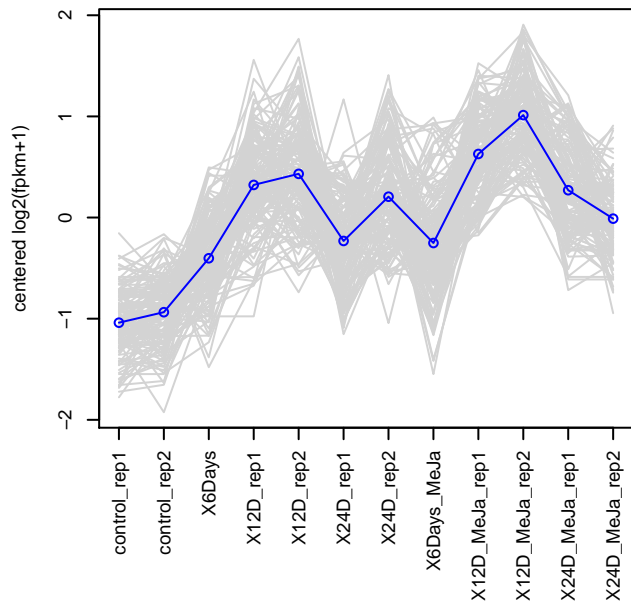

subcluster\_46\_log2\_medianCentered\_fpk.matrix, 23 tra

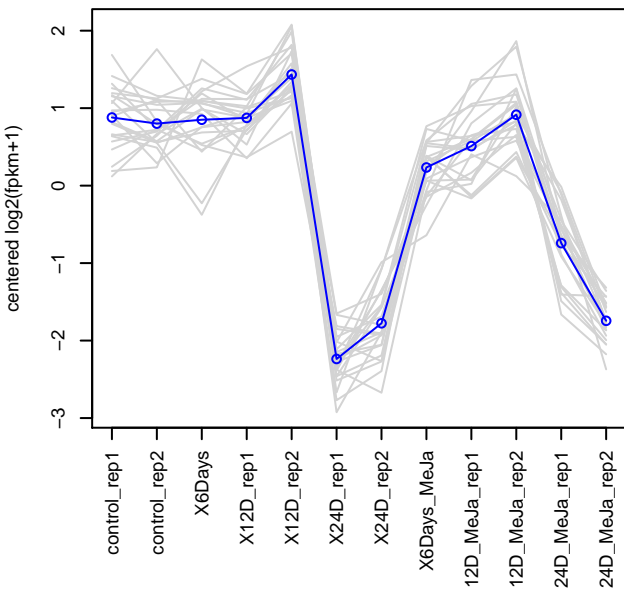

subcluster\_47\_log2\_medianCentered\_fpk.matrix, 50 tra

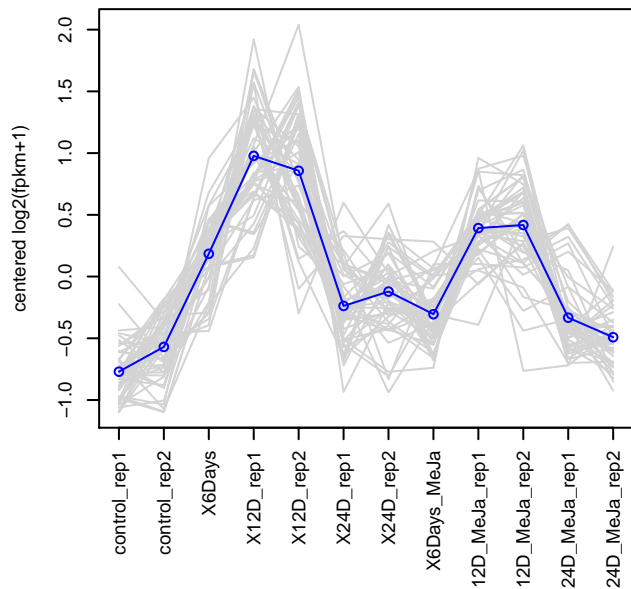

subcluster\_48\_log2\_medianCentered\_fpk.matrix, 11 tra subcluster\_49\_log2\_medianCentered\_fpk.matrix, 83 tra

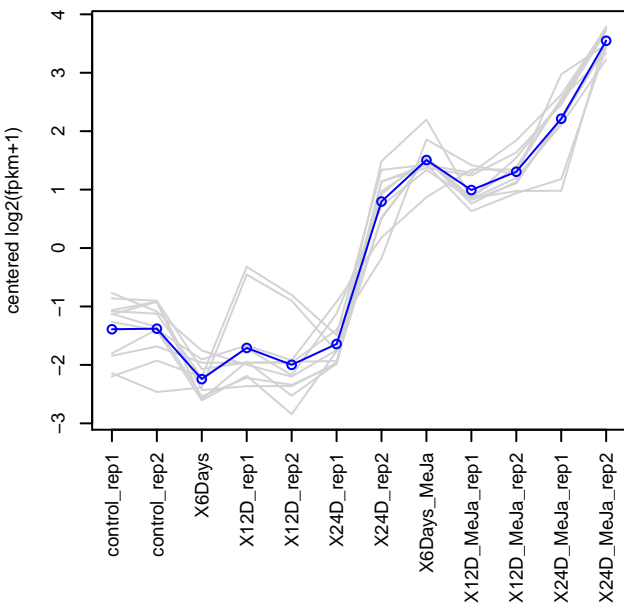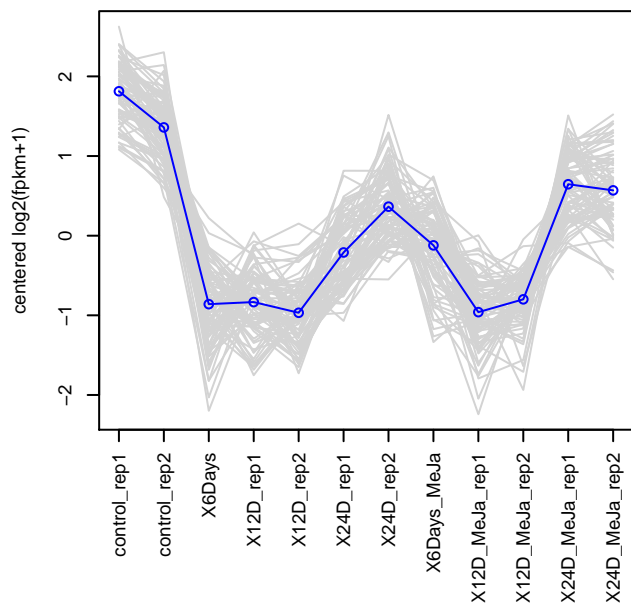

subcluster\_4\_log2\_medianCentered\_fpk.matrix, 151 tra subcluster\_50\_log2\_medianCentered\_fpk.matrix, 54 tra

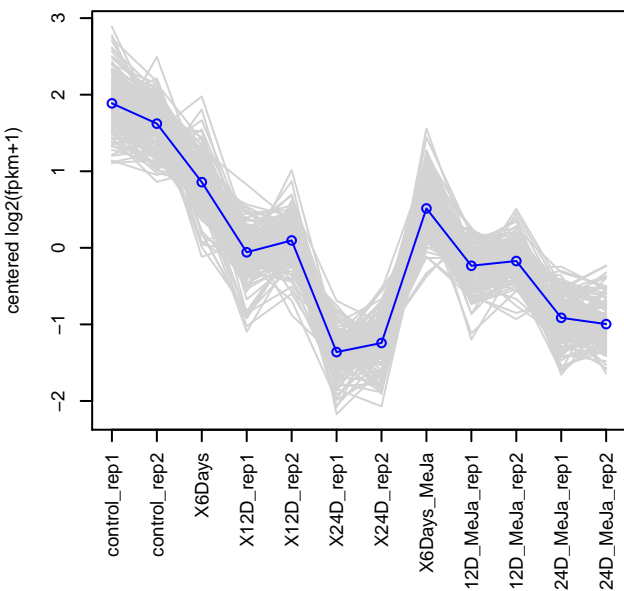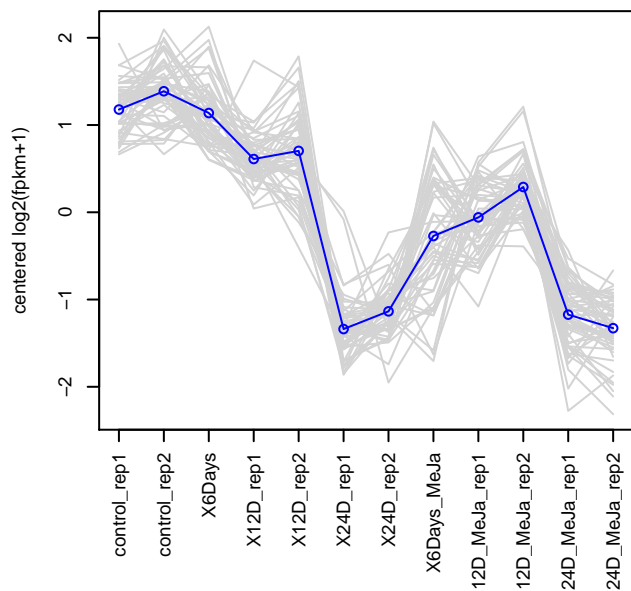

subcluster\_51\_log2\_medianCentered\_fpk.matrix, 14 tra

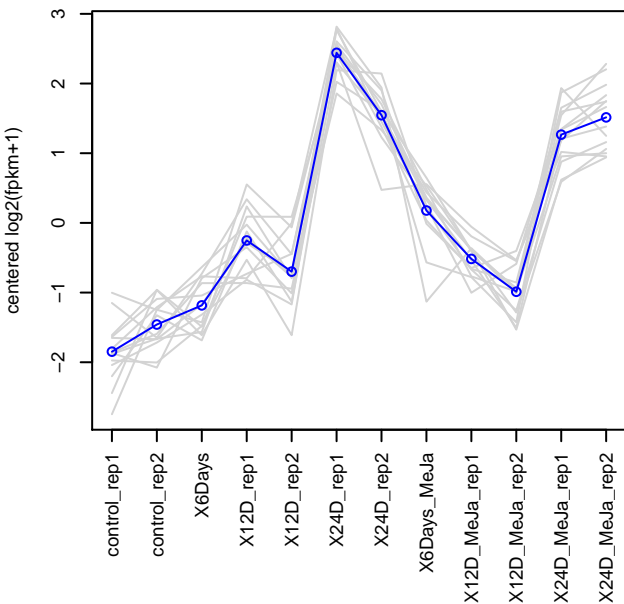

subcluster\_52\_log2\_medianCentered\_fpk.matrix, 5 tra

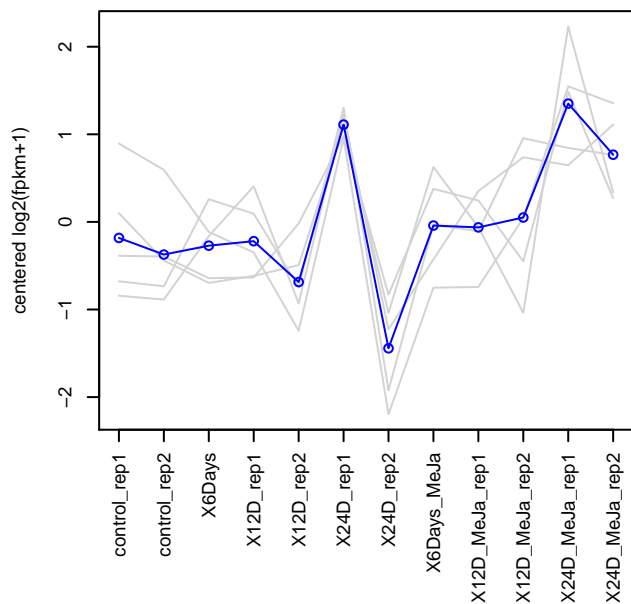

subcluster\_53\_log2\_medianCentered\_fpk.matrix, 88 tra

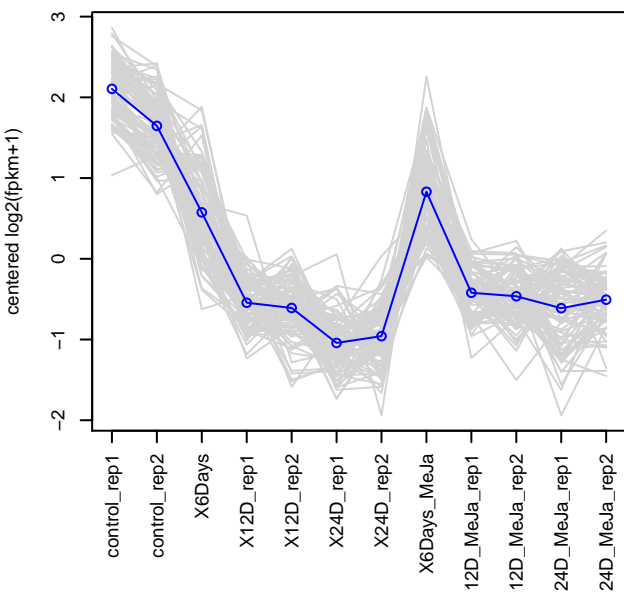

subcluster\_54\_log2\_medianCentered\_fpk.matrix, 13 tra

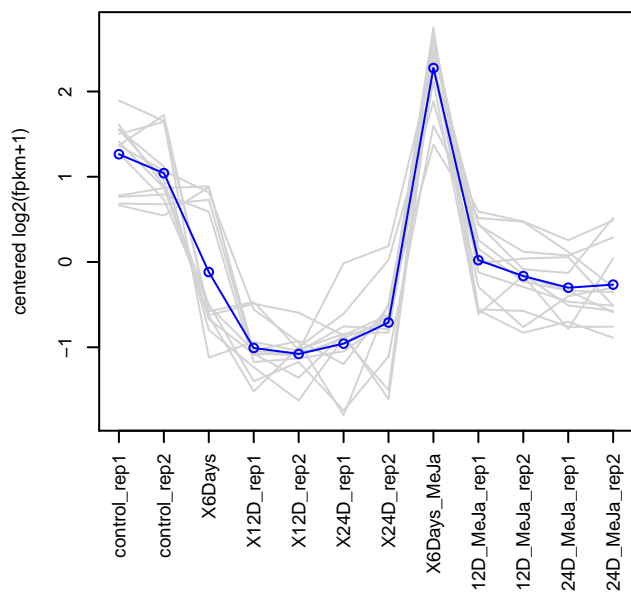

subcluster\_55\_log2\_medianCentered\_fpk.matrix, 68 tra

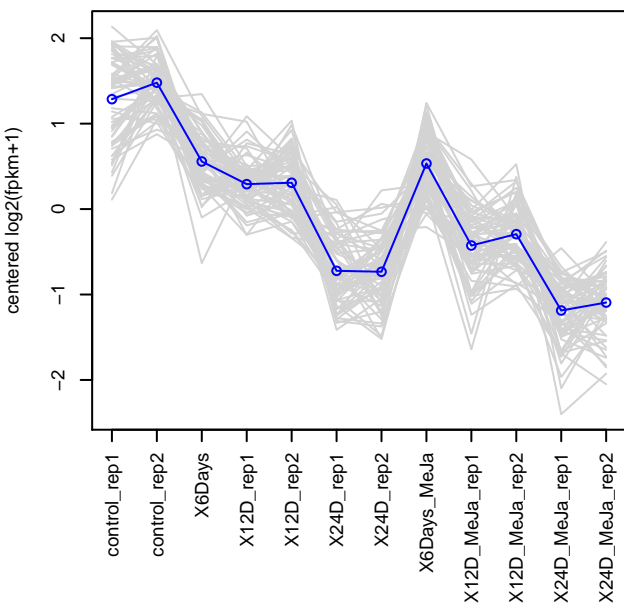

subcluster\_56\_log2\_medianCentered\_fpk.matrix, 41 tra

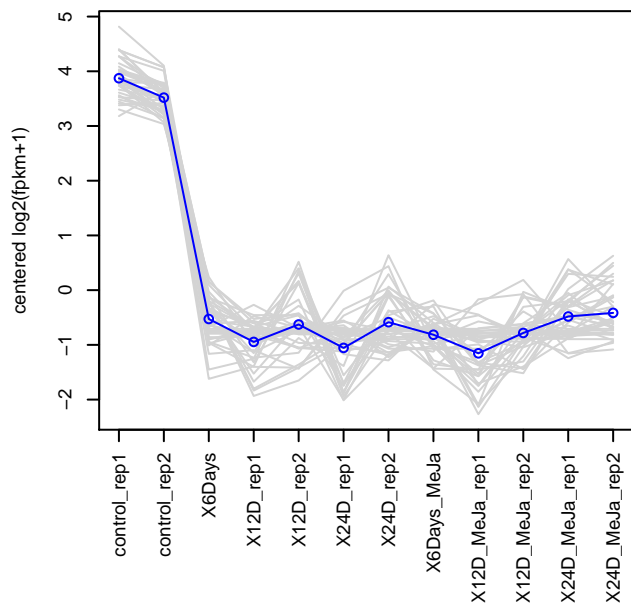

subcluster\_57\_log2\_medianCentered\_fpk.matrix, 142 tra

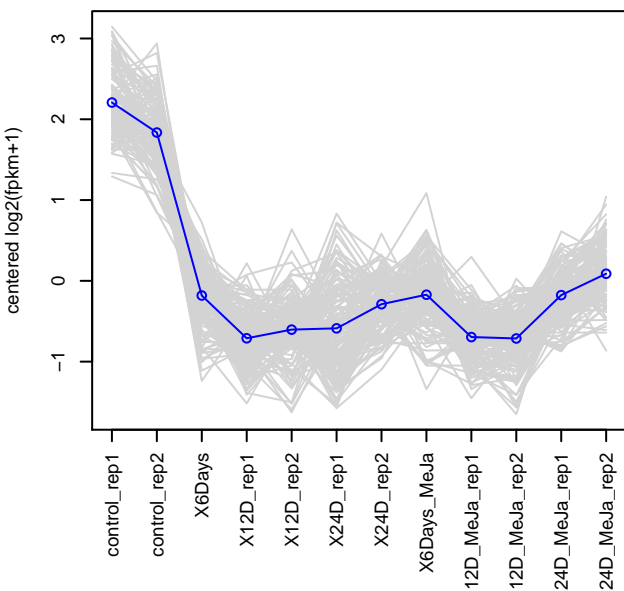

subcluster\_58\_log2\_medianCentered\_fpk.matrix, 30 tra

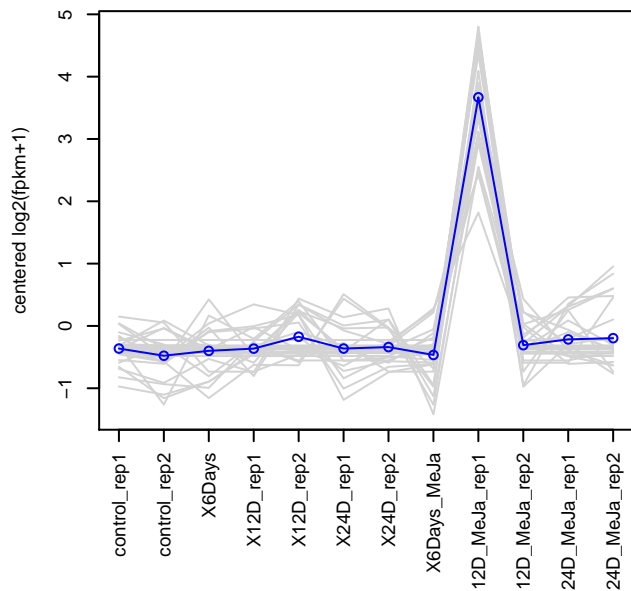

subcluster\_59\_log2\_medianCentered\_fpkm.matrix, 35 tra

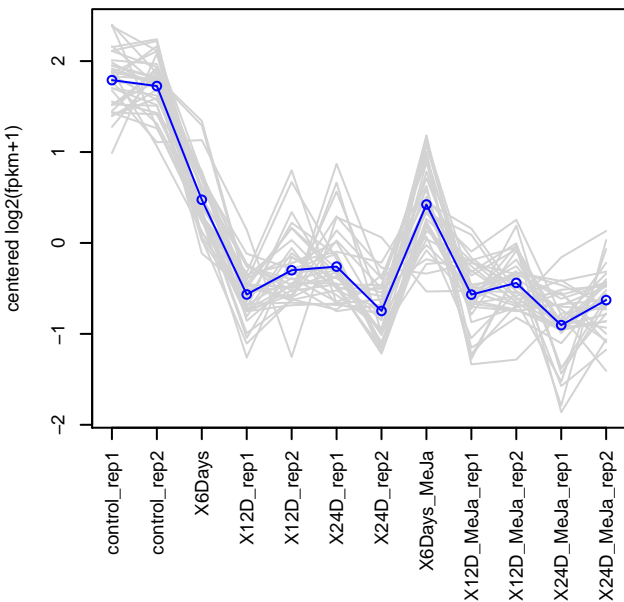

subcluster\_5\_log2\_medianCentered\_fpkm.matrix, 20 tra

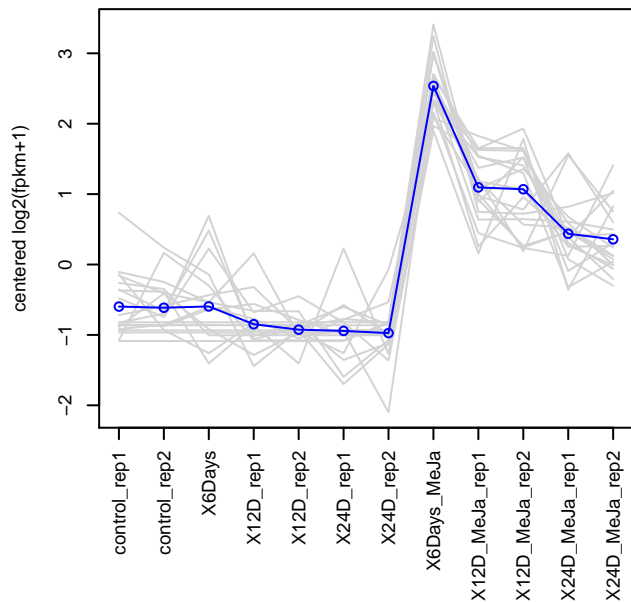

subcluster\_60\_log2\_medianCentered\_fpkm.matrix, 37 tra

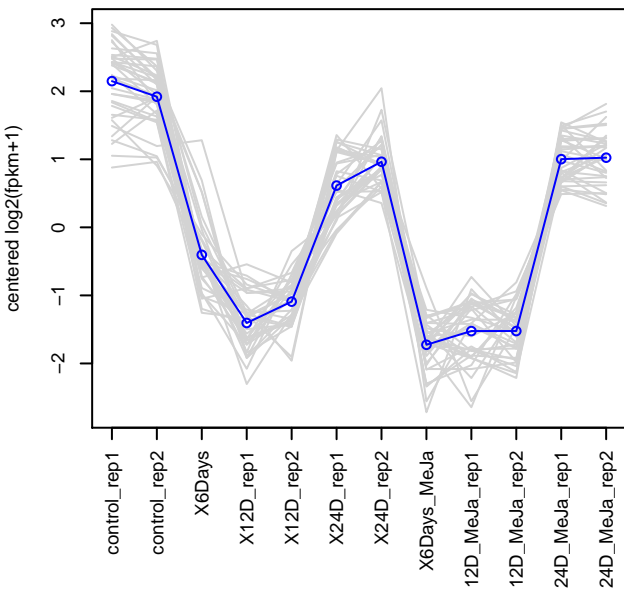

subcluster\_61\_log2\_medianCentered\_fpkm.matrix, 74 tra

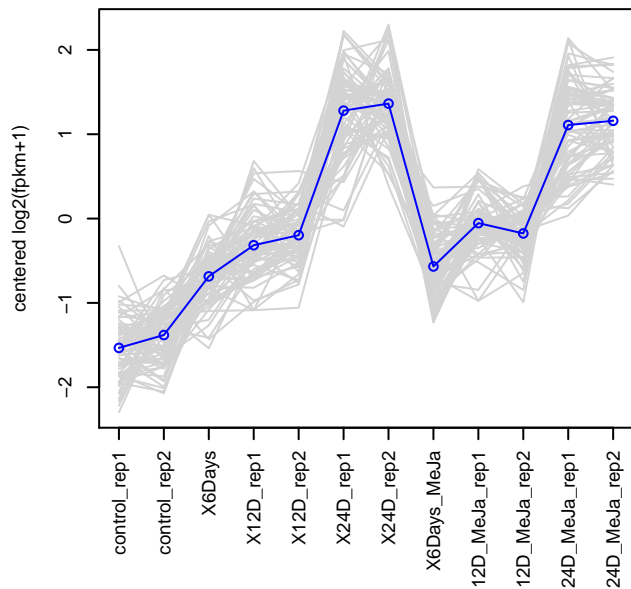

subcluster\_62\_log2\_medianCentered\_fpkkmatrix, 52 tra subcluster\_63\_log2\_medianCentered\_fpkkmatrix, 115 tra

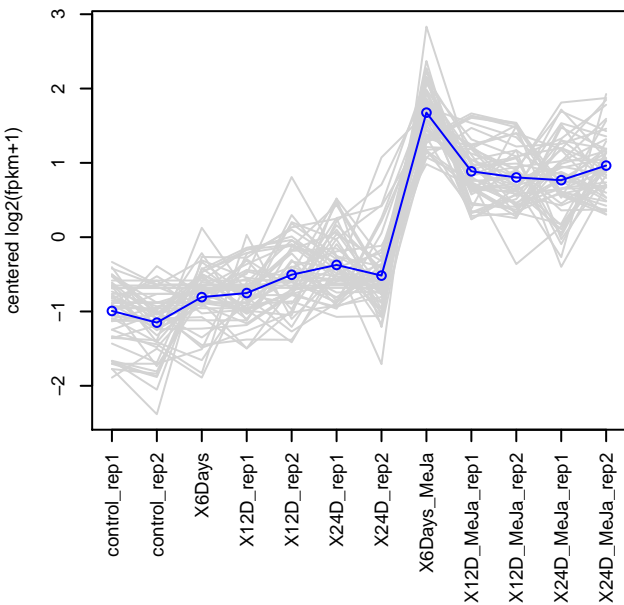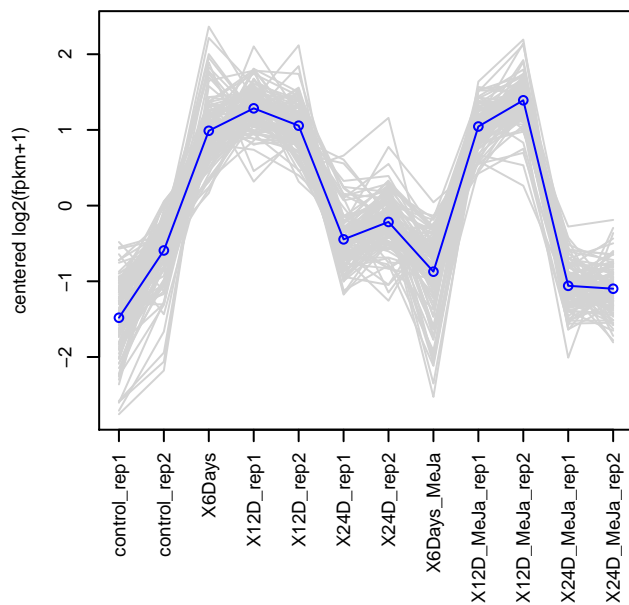

subcluster\_64\_log2\_medianCentered\_fpkkmatrix, 62 tra subcluster\_65\_log2\_medianCentered\_fpkkmatrix, 62 tra

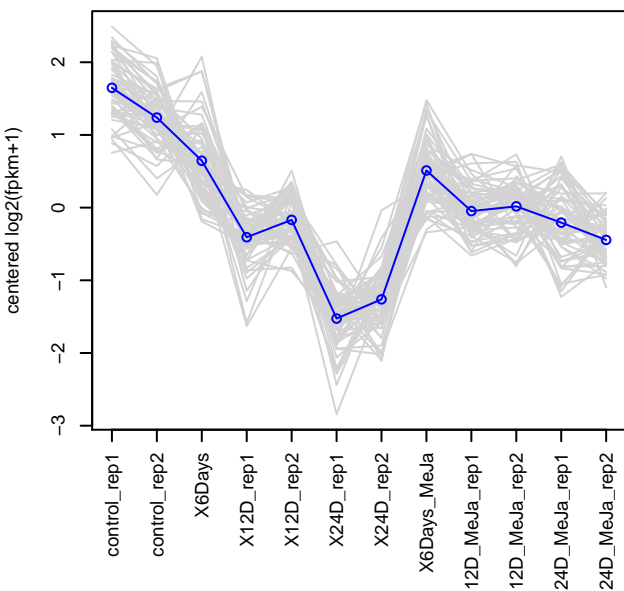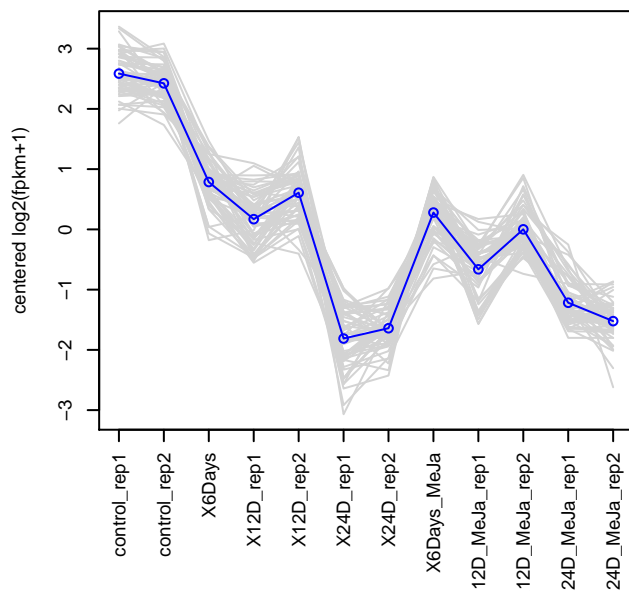



subcluster\_66\_log2\_medianCentered\_fpk.matrix, 29 tra subcluster\_67\_log2\_medianCentered\_fpk.matrix, 17 tra

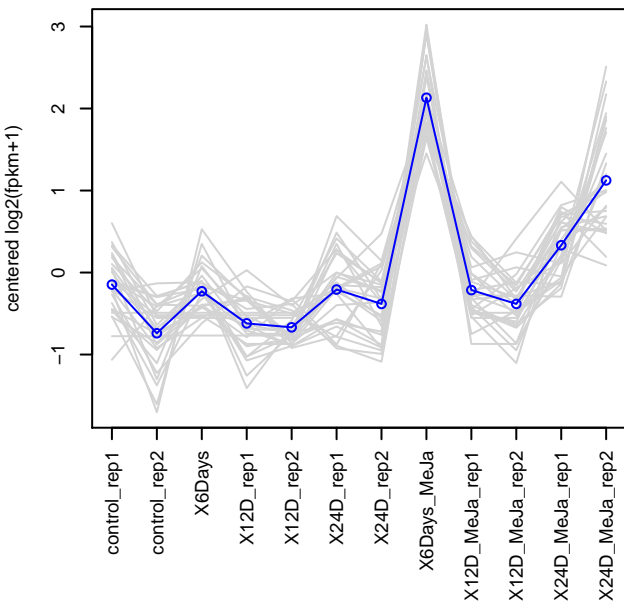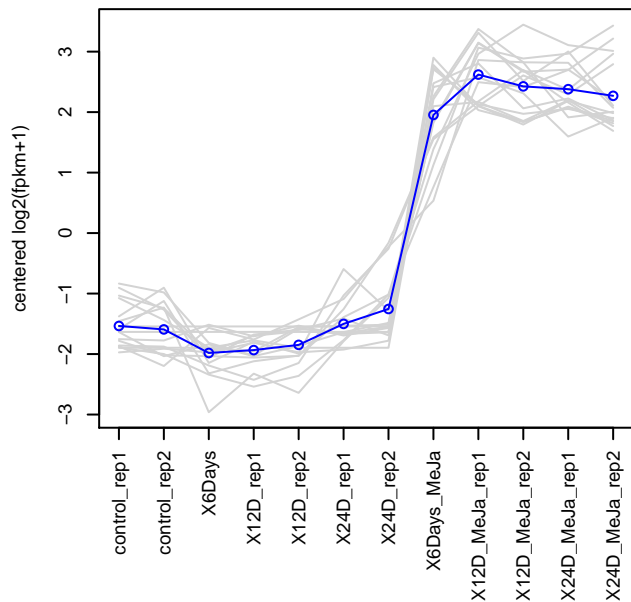

subcluster\_68\_log2\_medianCentered\_fpk.matrix, 19 tra subcluster\_69\_log2\_medianCentered\_fpk.matrix, 32 tra

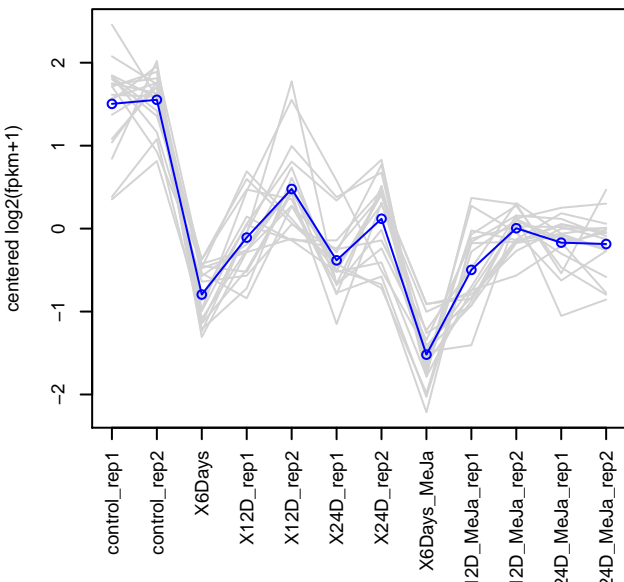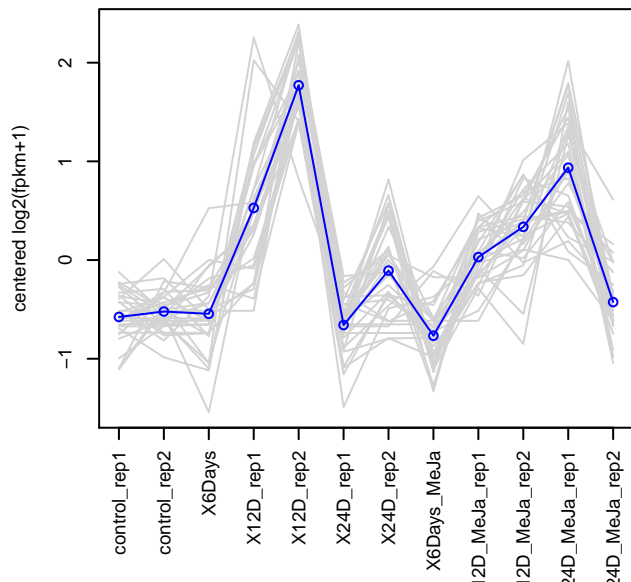

subcluster\_6\_log2\_medianCentered\_fpkm.matrix, 166 tra

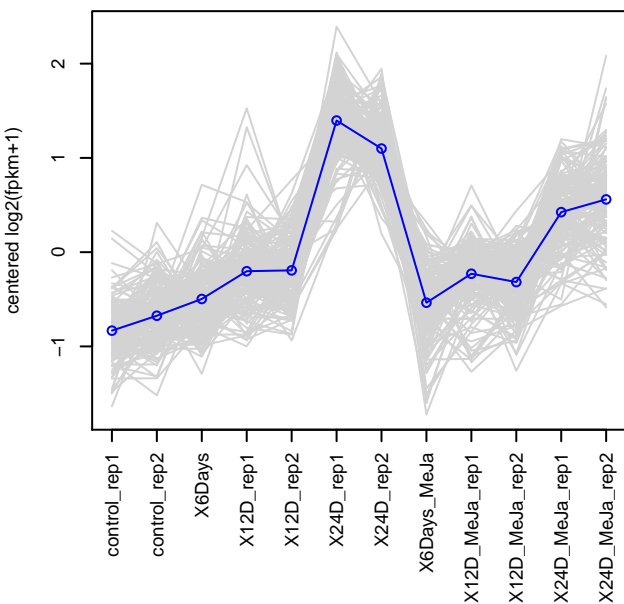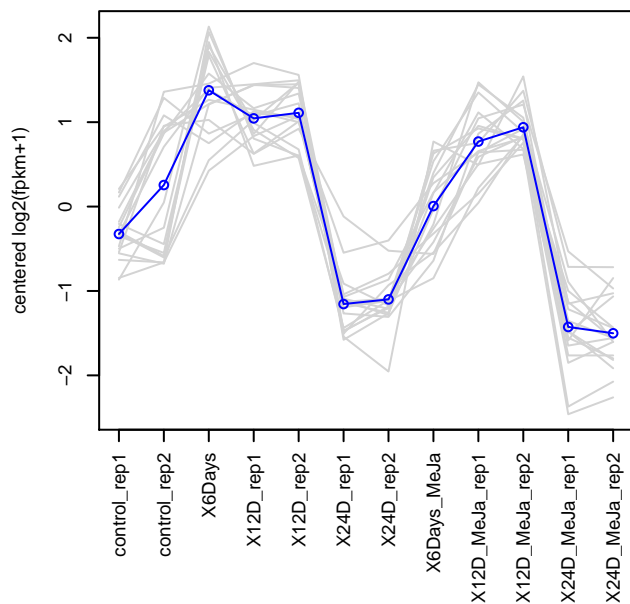

subcluster\_71\_log2\_medianCentered\_fpkm.matrix, 15 tra

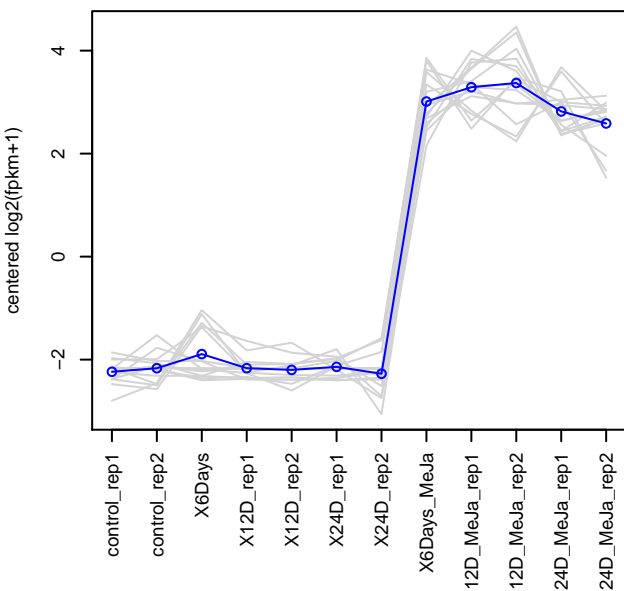

subcluster\_72\_log2\_medianCentered\_fpkm.matrix, 8 tra

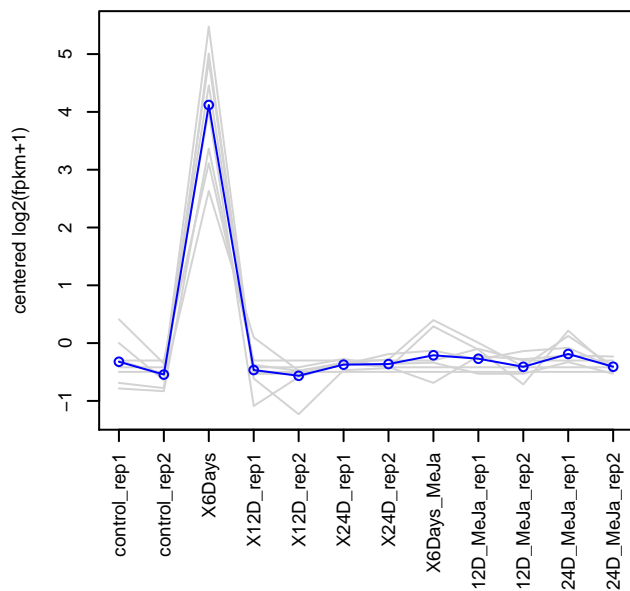

subcluster\_73\_log2\_medianCentered\_fpk.matrix, 20 tra subcluster\_74\_log2\_medianCentered\_fpk.matrix, 76 tra

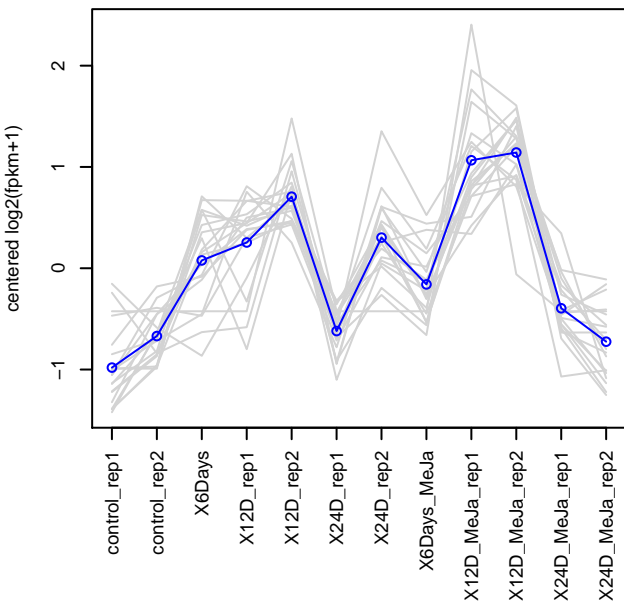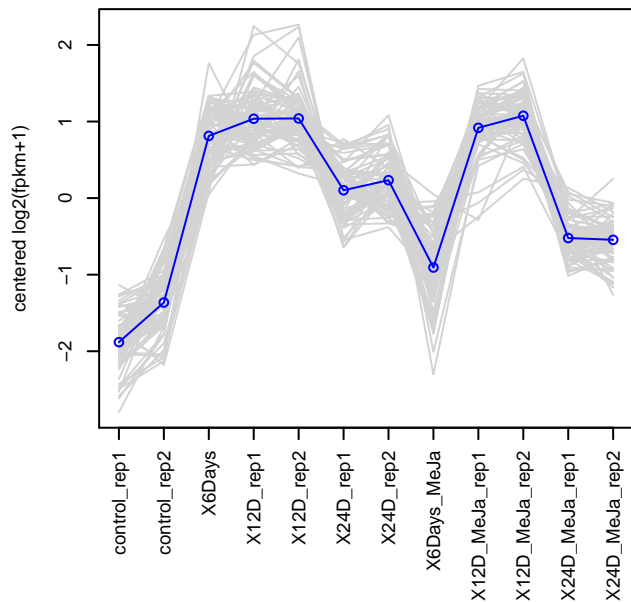

subcluster\_75\_log2\_medianCentered\_fpk.matrix, 87 tra subcluster\_76\_log2\_medianCentered\_fpk.matrix, 23 tra

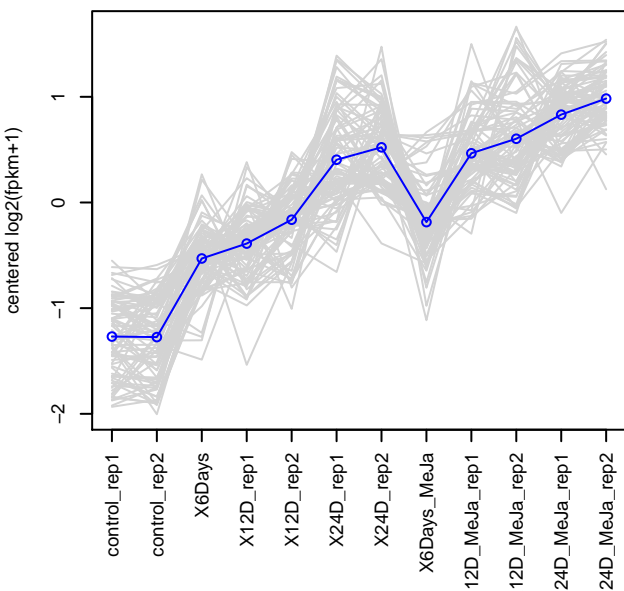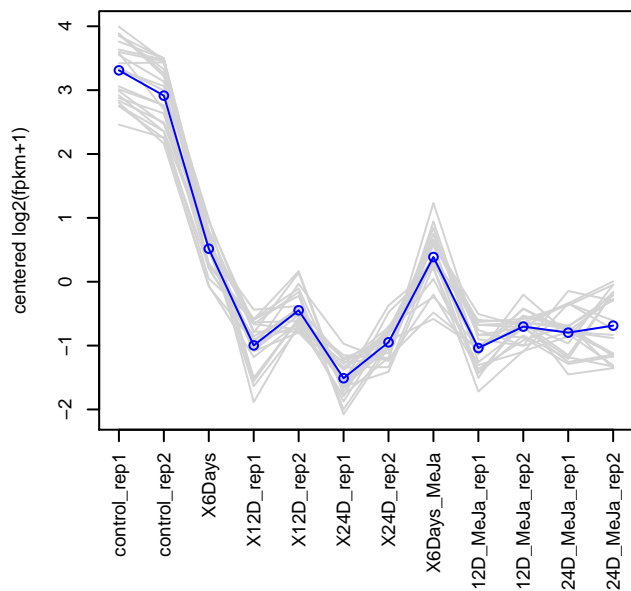

subcluster\_77\_log2\_medianCentered\_fpk.matrix, 5 tra subcluster\_78\_log2\_medianCentered\_fpk.matrix, 14 tra

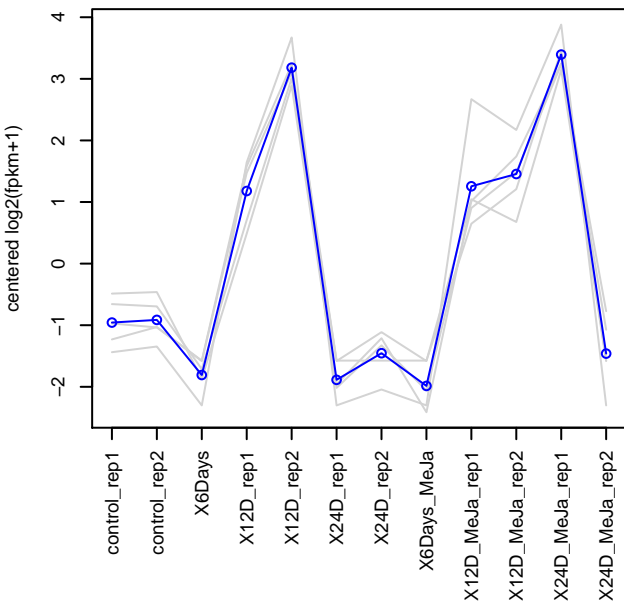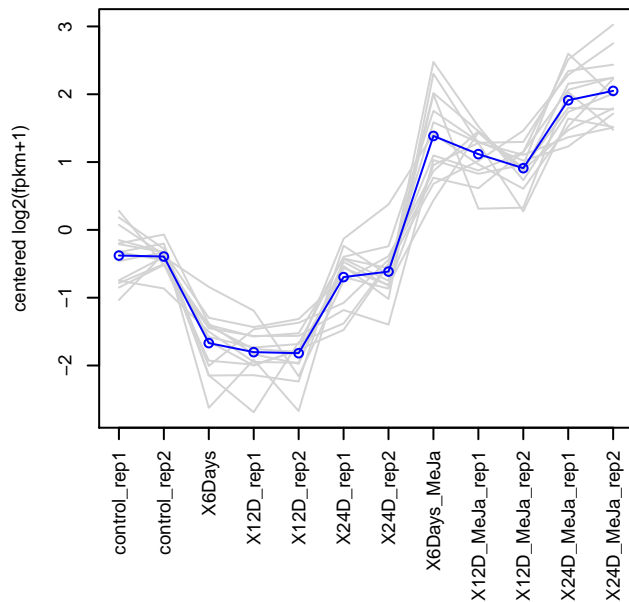

subcluster\_79\_log2\_medianCentered\_fpk.matrix, 15 tra subcluster\_7\_log2\_medianCentered\_fpk.matrix, 119 tra

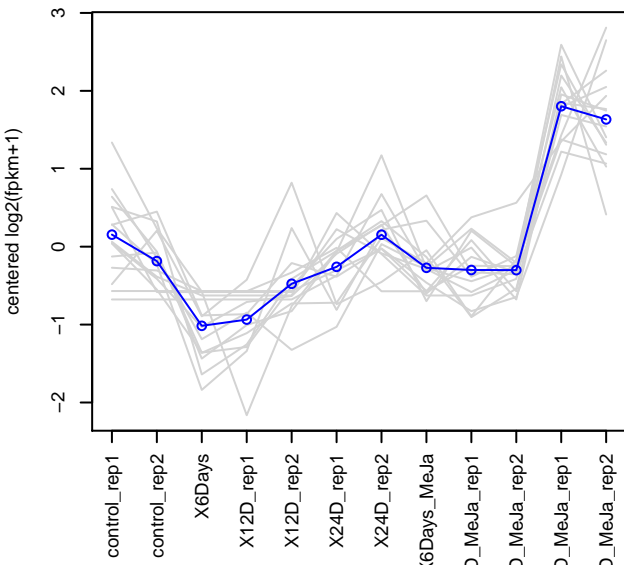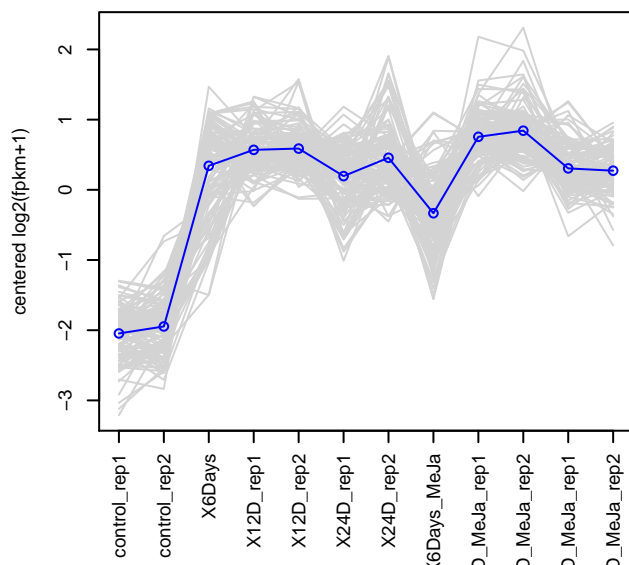

subcluster\_80\_log2\_medianCentered\_fpkm.matrix, 60 tra subcluster\_81\_log2\_medianCentered\_fpkm.matrix, 124 tra

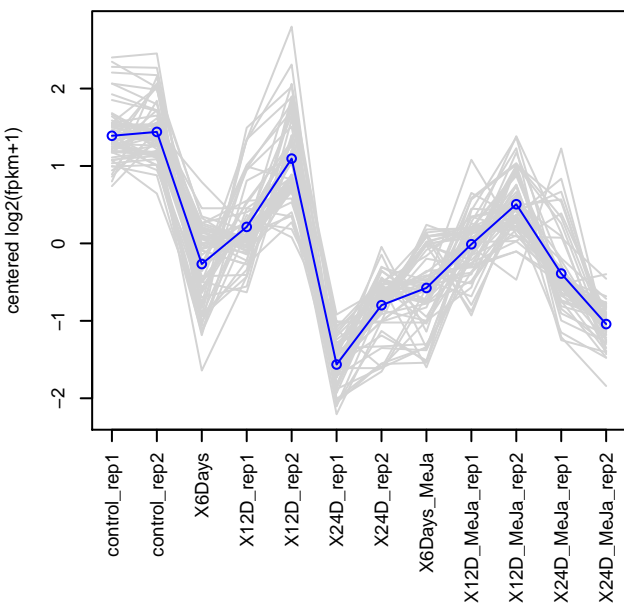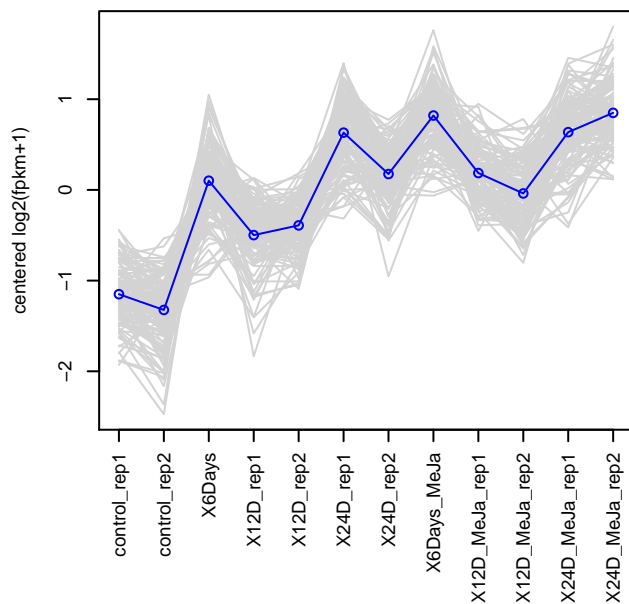

subcluster\_82\_log2\_medianCentered\_fpkm.matrix, 28 tra subcluster\_83\_log2\_medianCentered\_fpkm.matrix, 13 tra

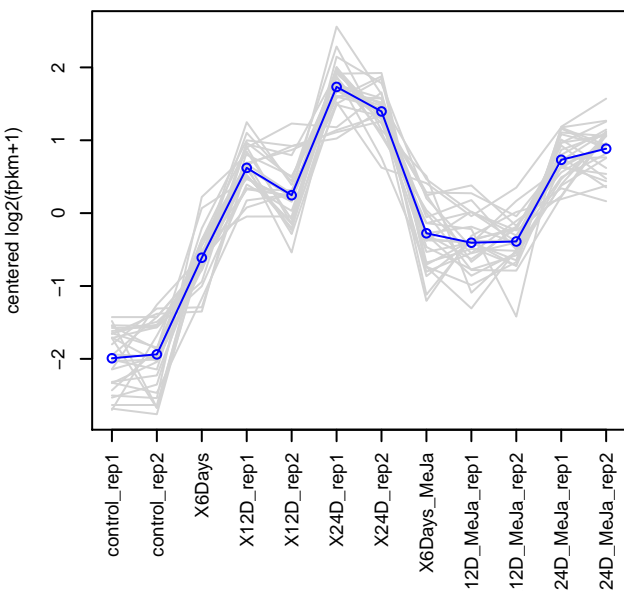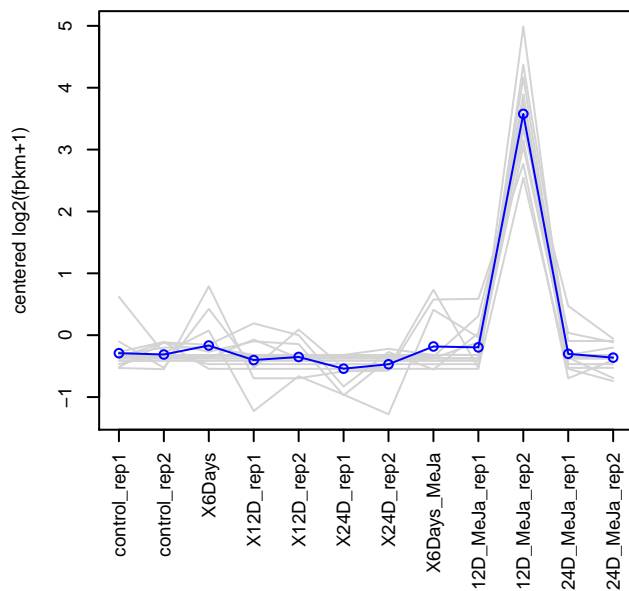

subcluster\_84\_log2\_medianCentered\_fpk.matrix, 69 tra

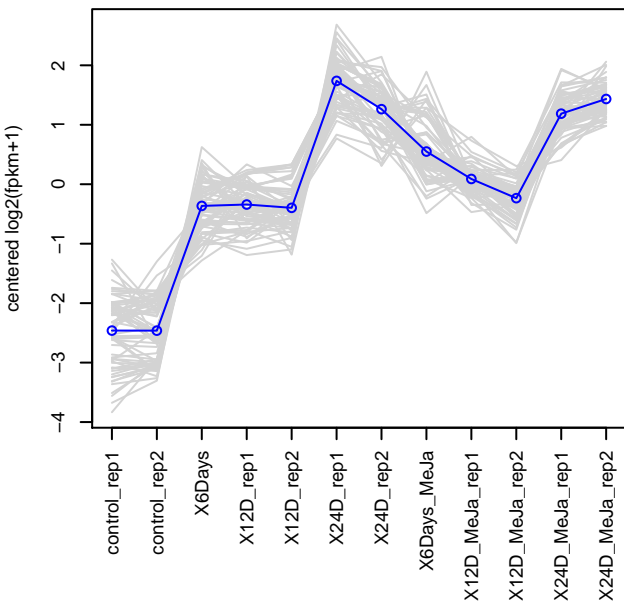

subcluster\_85\_log2\_medianCentered\_fpk.matrix, 7 tra

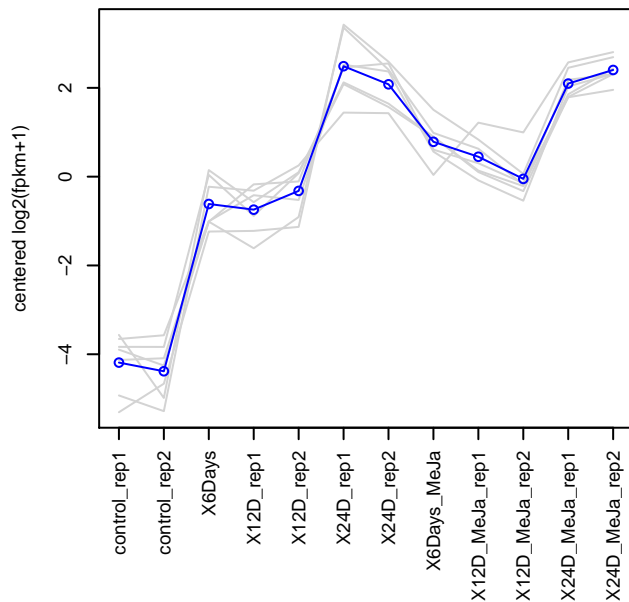

subcluster\_86\_log2\_medianCentered\_fpk.matrix, 1 tra

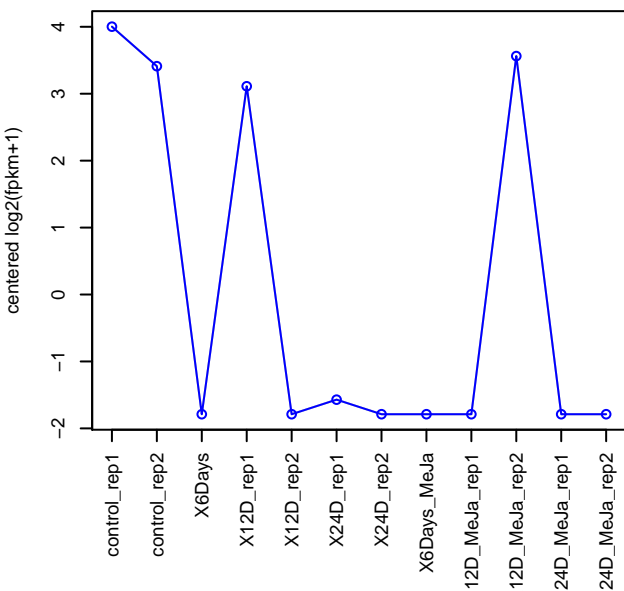

subcluster\_87\_log2\_medianCentered\_fpk.matrix, 4 tra

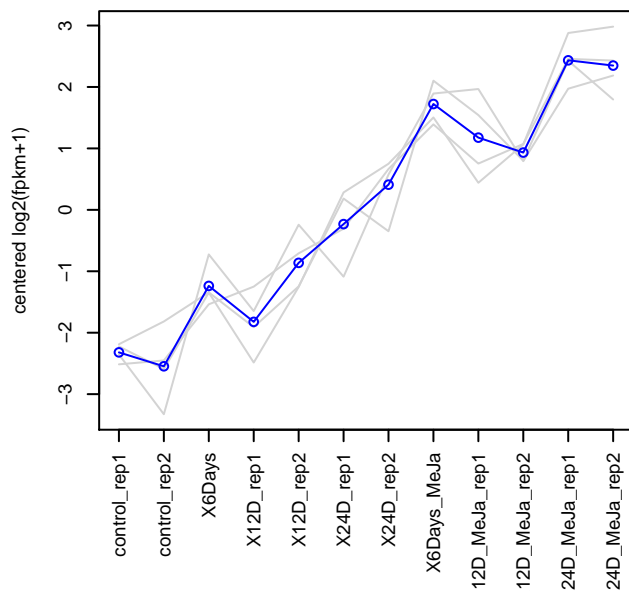

subcluster\_88\_log2\_medianCentered\_fpk.matrix, 3 trar subcluster\_89\_log2\_medianCentered\_fpk.matrix, 34 tra

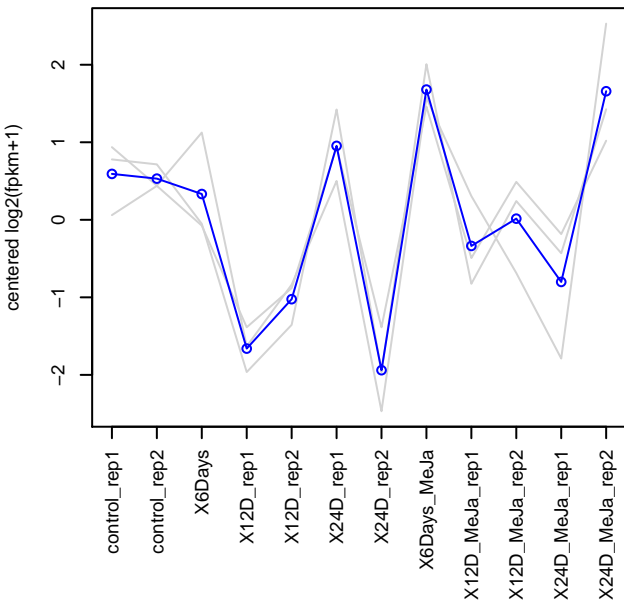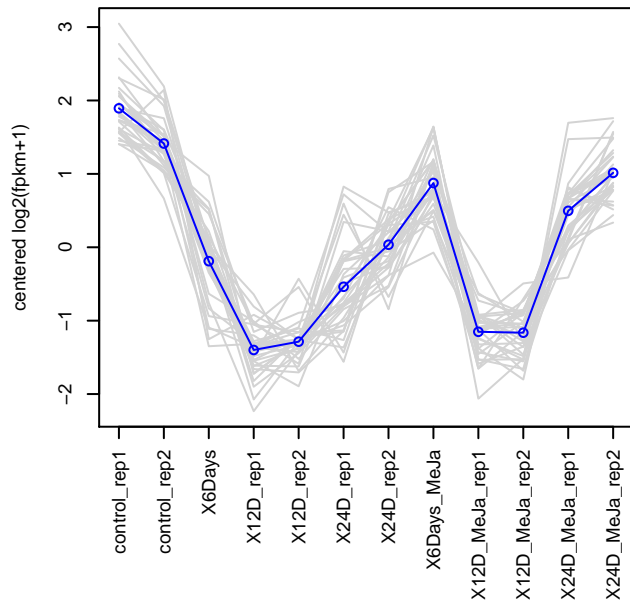

subcluster\_8\_log2\_medianCentered\_fpk.matrix, 41 trar subcluster\_90\_log2\_medianCentered\_fpk.matrix, 28 tra

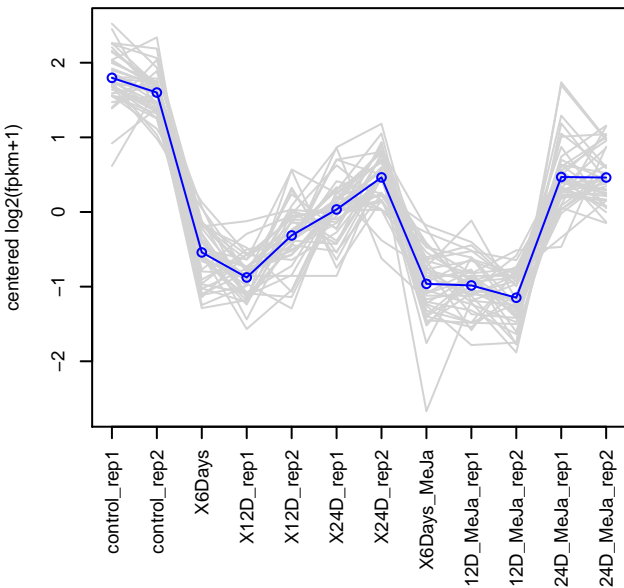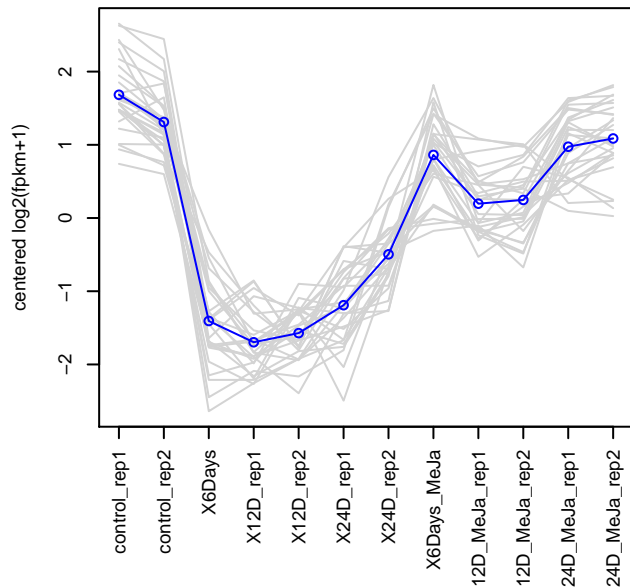

subcluster\_91\_log2\_medianCentered\_fpk.matrix, 63 tra

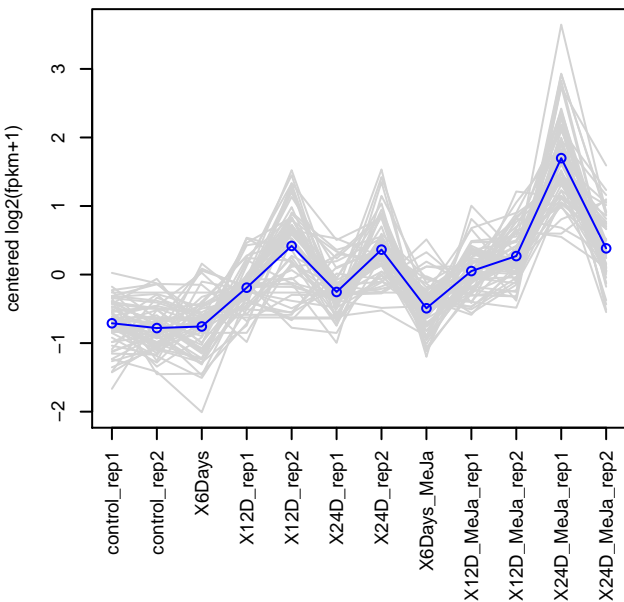

subcluster\_92\_log2\_medianCentered\_fpk.matrix, 5 tra

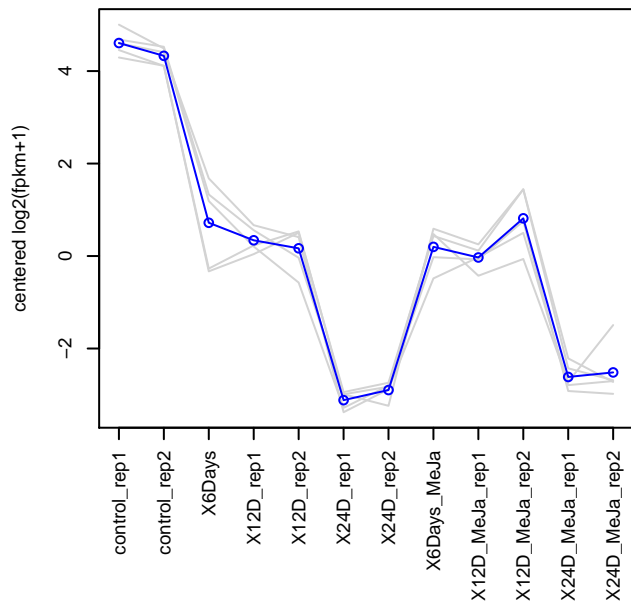

subcluster\_93\_log2\_medianCentered\_fpk.matrix, 12 tra

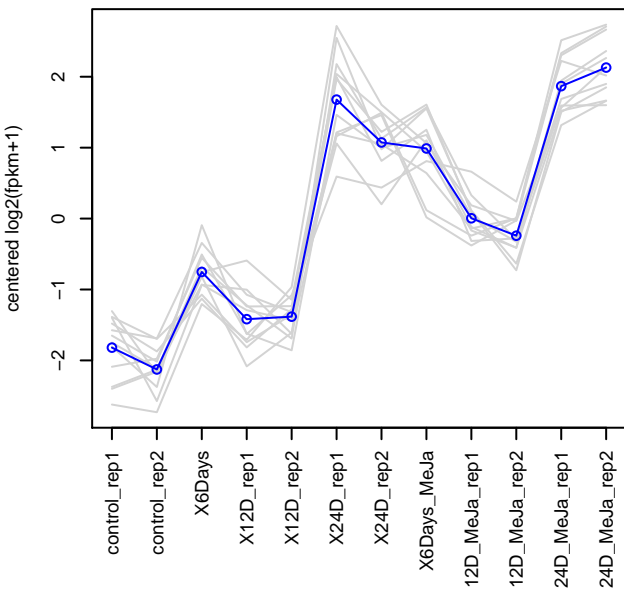

subcluster\_94\_log2\_medianCentered\_fpk.matrix, 12 tra

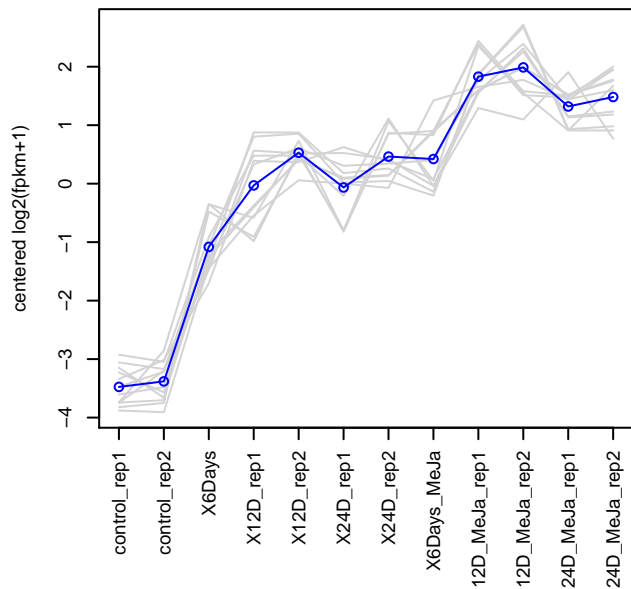



subcluster\_95\_log2\_medianCentered\_fpk.matrix, 14 tra subcluster\_96\_log2\_medianCentered\_fpk.matrix, 32 tra

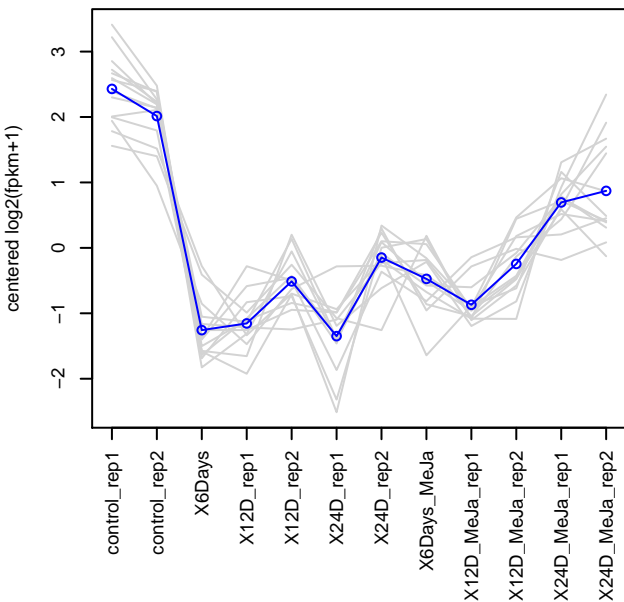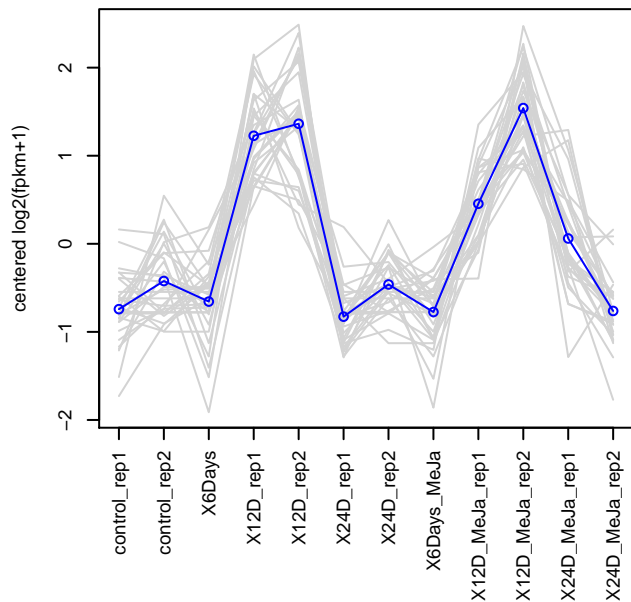

subcluster\_97\_log2\_medianCentered\_fpk.matrix, 73 tra subcluster\_98\_log2\_medianCentered\_fpk.matrix, 10 tra

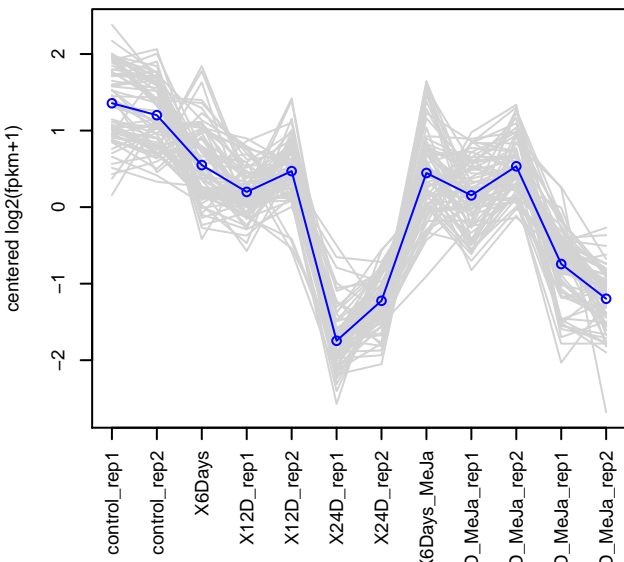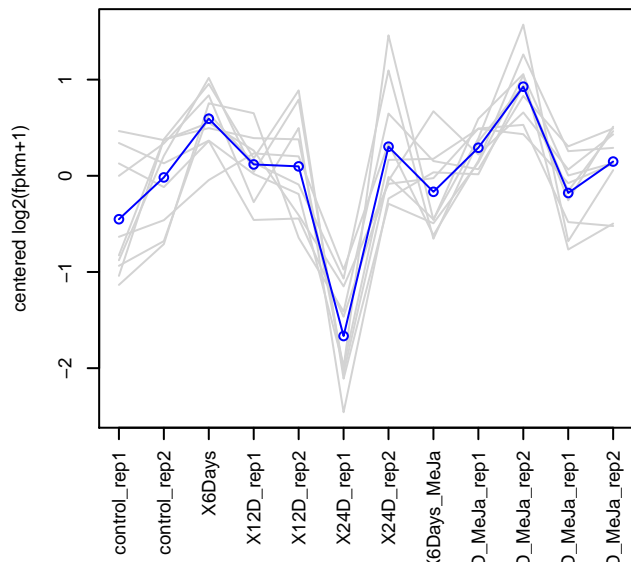

subcluster\_99\_log2\_medianCentered\_fpk.matrix, 28 tra subcluster\_9\_log2\_medianCentered\_fpk.matrix, 328 tra

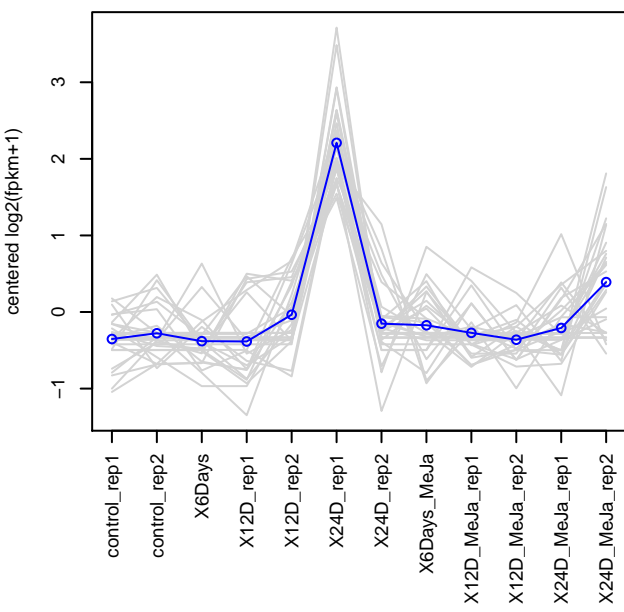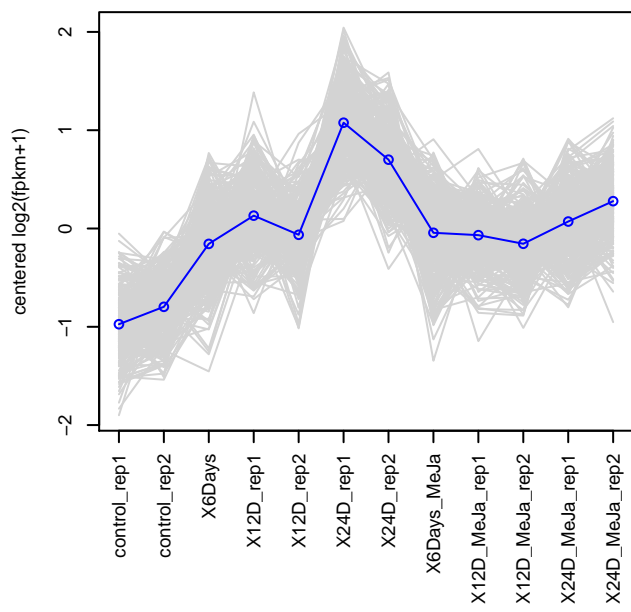

Supplement: mmc1 [file mmc1.pdf]
